# Supplementary material for: HaploGrep 2: mitochondrial haplogroup classification in the era of high-throughput sequencing
Source: PubMed Central journal article supplement — Nucleic Acids Res. 2016 Apr 15;44(Web Server issue):W58–63. doi: 10.1093/nar/gkw233 (PMC4987869; doi:10.1093/nar/gkw233), 2016-04-15
Supplement: supp_gkw233_HaploGrep2-SupplementalMaterial.pdf [file supp_gkw233_HaploGrep2-SupplementalMaterial.pdf]

# Supplemental Material: HaploGrep 2

## Contents

|                                                                                      |    |
|--------------------------------------------------------------------------------------|----|
| Algorithm 1:.....                                                                    | 1  |
| Suppl.Table 1: Mitochondrial DNA polymorphisms according Phylotree 17 .....          | 2  |
| Suppl.Table 2: Data from Li et al. (1) checked according haplogroup concordance..... | 29 |
| Suppl.Table 3: Data from the 1000G Phase 1 (2) of 1,074 samples.....                 | 32 |
| Suppl.Table 4: Data from the 1000G Phase 3 (3) of 2,534 samples.....                 | 33 |
| References .....                                                                     | 36 |

### Algorithm 1: Calculation of phylogenetic weights per variant in the new version of HaploGrep 2

Let the index set  $I$  refer to all mutations found at least once in Phylotree, and for each  $i \in I$  let  $f_i$  the absolute frequency of mutation  $i$  on the current build of Phylotree.

Let  $F = \max_i f_i$  be the maximum of all those frequencies.

For  $i \in I$  put  $w_i = 1 + (9/\ln F) \cdot [\ln F - \ln f_i] = 10 - 9 \ln f_i / \ln F$  (round to 1 decimal digit).

Conversely, given  $1 \leq w \leq 10$ , the corresponding frequency  $f$  is calculated as  $f = F^{(10-w)/9}$ .

*In particular, for the extreme 152 transition we have minimum weight 1,*

*for the next 16311 transition we get weight ~1.7,*

*for a mutation with score 2 we get weight ~8.8*

*for the score 1 mutations we finally obtain the maximum weight 10.*

Suppl. Table 1: Mitochondrial DNA polymorphisms, the phylogenetic weights according Algorithm 1 and the occurrence of the polymorphism in Phylotree 17 (<http://phylotree.org/>).

1

| Polymorphism | Weight | Occurrence | 198T    | 4.6 | 24 | 16213A  | 5.5 | 14 |
|--------------|--------|------------|---------|-----|----|---------|-----|----|
| 152C         | 1      | 197        | 16260T  | 4.7 | 23 | 16356C  | 5.5 | 14 |
| 16311C       | 1.6    | 138        | 16320T  | 4.7 | 22 | 12771A  | 5.5 | 14 |
| 146C         | 1.8    | 122        | 16148T  | 4.7 | 22 | 7337A   | 5.5 | 14 |
| 195C         | 2      | 113        | 16292T  | 4.8 | 21 | 4216C   | 5.5 | 14 |
| 16189C       | 2      | 110        | 16399G  | 4.8 | 21 | 12007A  | 5.5 | 14 |
| 16362C       | 2.5    | 81         | 16357C  | 4.9 | 20 | 961C    | 5.5 | 14 |
| 16129A       | 2.6    | 76         | 10398G  | 4.9 | 20 | 15244G  | 5.5 | 14 |
| 150T         | 2.7    | 74         | 153G    | 5   | 19 | 5773A   | 5.5 | 14 |
| 709A         | 3      | 60         | 13105G  | 5   | 19 | 15930A  | 5.5 | 14 |
| 16172C       | 3.2    | 55         | 513A    | 5   | 19 | 16300G  | 5.5 | 14 |
| 16093C       | 3.2    | 55         | 9254G   | 5   | 19 | 5585A   | 5.5 | 14 |
| 16278T       | 3.4    | 49         | 8281d   | 5   | 19 | 16301T  | 5.5 | 14 |
| 11914A       | 3.4    | 48         | 8282d   | 5   | 19 | 12406A  | 5.5 | 14 |
| 207A         | 3.4    | 48         | 8283d   | 5   | 19 | 16192T! | 5.5 | 14 |
| 204C         | 3.6    | 44         | 8284d   | 5   | 19 | 15314A  | 5.6 | 13 |
| 16291T       | 3.6    | 42         | 8285d   | 5   | 19 | 16235G  | 5.6 | 13 |
| 199C         | 3.7    | 41         | 8286d   | 5   | 19 | 16193T  | 5.6 | 13 |
| 189G         | 3.7    | 40         | 8287d   | 5   | 19 | 73G     | 5.6 | 13 |
| 13708A       | 3.8    | 39         | 8288d   | 5   | 19 | 1438G!  | 5.6 | 13 |
| 16319A       | 3.8    | 39         | 8289d   | 5   | 19 | 14560A  | 5.6 | 13 |
| 16256T       | 3.8    | 38         | 6620C   | 5.1 | 18 | 1888A   | 5.6 | 13 |
| 151T         | 3.8    | 38         | 15884A  | 5.1 | 18 | 16368C  | 5.6 | 13 |
| 16145A       | 3.9    | 37         | 16218T  | 5.1 | 18 | 16153A  | 5.6 | 13 |
| 5460A        | 3.9    | 36         | 16239T  | 5.1 | 18 | 16168T  | 5.6 | 13 |
| 16234T       | 3.9    | 36         | 16527T  | 5.1 | 18 | 16288C  | 5.6 | 13 |
| 16274A       | 3.9    | 35         | 16126C  | 5.1 | 18 | 3591A   | 5.6 | 13 |
| 16390A       | 4      | 33         | 16169T  | 5.1 | 18 | 15172A  | 5.6 | 13 |
| 573.XC       | 4.1    | 32         | 64T     | 5.2 | 17 | 12358G  | 5.6 | 13 |
| 16086C       | 4.1    | 32         | 16295T  | 5.2 | 17 | 15236G  | 5.6 | 13 |
| 15924G       | 4.2    | 31         | 13759A  | 5.2 | 17 | 10084C  | 5.6 | 13 |
| 16261T       | 4.2    | 31         | 11016A  | 5.2 | 17 | 13135A  | 5.6 | 13 |
| 16209C       | 4.3    | 29         | 16184T  | 5.2 | 17 | 7853A   | 5.6 | 13 |
| 143A         | 4.3    | 29         | 16129A! | 5.2 | 17 | 16324C  | 5.6 | 13 |
| 16294T       | 4.3    | 28         | 16290T  | 5.3 | 16 | 16179T  | 5.6 | 13 |
| 1719A        | 4.4    | 27         | 16176T  | 5.3 | 16 | 234G    | 5.6 | 13 |
| 152C!        | 4.5    | 26         | 15758G  | 5.3 | 16 | 16293G  | 5.8 | 12 |
| 16355T       | 4.5    | 26         | 16270T  | 5.3 | 16 | 1462A   | 5.8 | 12 |
| 16325C       | 4.5    | 26         | 16287T  | 5.3 | 16 | 3316A   | 5.8 | 12 |
| 200G         | 4.5    | 26         | 16092C  | 5.3 | 16 | 12346T  | 5.8 | 12 |
| 16249C       | 4.5    | 26         | 1598A   | 5.3 | 16 | 14053G  | 5.8 | 12 |
| 16223T!      | 4.5    | 26         | 3834A   | 5.4 | 15 | 4688C   | 5.8 | 12 |
| 16051G       | 4.5    | 25         | 249d    | 5.4 | 15 | 9966A   | 5.8 | 12 |
| 93G          | 4.5    | 25         | 194T    | 5.4 | 15 | 16242T  | 5.8 | 12 |
| 8251A        | 4.5    | 25         | 3010A   | 5.4 | 15 | 9055A   | 5.8 | 12 |
| 16192T       | 4.5    | 25         | 10685A  | 5.4 | 15 | 16243C  | 5.8 | 12 |
| 185A         | 4.5    | 25         | 14569A  | 5.4 | 15 | 16298C  | 5.8 | 12 |
| 16266T       | 4.6    | 24         | 16140C  | 5.4 | 15 | 228A    | 5.8 | 12 |
| 5147A        | 4.6    | 24         | 14470C  | 5.4 | 15 | 14364A  | 5.8 | 12 |
| 16111T       | 4.6    | 24         | 195C!   | 5.4 | 15 | 10373A  | 5.8 | 12 |
| 16304C       | 4.6    | 24         | 5899.XC | 5.5 | 14 | 13145A  | 5.8 | 12 |

|        |     |    |         |     |   |         |     |   |
|--------|-----|----|---------|-----|---|---------|-----|---|
| 14323A | 5.8 | 12 | 9554A   | 6.3 | 9 | 14040A  | 6.5 | 8 |
| 16187T | 5.8 | 12 | 9300A   | 6.3 | 9 | 16265C  | 6.5 | 8 |
| 16136C | 5.8 | 12 | 8856A   | 6.3 | 9 | 12630A  | 6.5 | 8 |
| 16526A | 5.8 | 12 | 5231A   | 6.3 | 9 | 13827G  | 6.5 | 8 |
| 263G!  | 5.8 | 12 | 12940A  | 6.3 | 9 | 15466A  | 6.5 | 8 |
| 14305A | 5.9 | 11 | 5054A   | 6.3 | 9 | 5108C   | 6.5 | 8 |
| 16114T | 5.9 | 11 | 11084G  | 6.3 | 9 | 6164T   | 6.5 | 8 |
| 4823C  | 5.9 | 11 | 5471A   | 6.3 | 9 | 5263T   | 6.5 | 8 |
| 183G   | 5.9 | 11 | 6293C   | 6.3 | 9 | 14016A  | 6.5 | 8 |
| 8473C  | 5.9 | 11 | 593C    | 6.3 | 9 | 10143A  | 6.5 | 8 |
| 13590A | 5.9 | 11 | 13434G  | 6.3 | 9 | 5237A   | 6.5 | 8 |
| 12172G | 5.9 | 11 | 3705A   | 6.3 | 9 | 12612G  | 6.5 | 8 |
| 16248T | 5.9 | 11 | 7805A   | 6.3 | 9 | 13879C  | 6.5 | 8 |
| 13194A | 5.9 | 11 | 13359A  | 6.3 | 9 | 3394C   | 6.5 | 8 |
| 8020A  | 5.9 | 11 | 6962A   | 6.3 | 9 | 15514C  | 6.5 | 8 |
| 16265G | 5.9 | 11 | 14587G  | 6.3 | 9 | 14905A  | 6.5 | 8 |
| 15670C | 5.9 | 11 | 9548A   | 6.3 | 9 | 214G    | 6.5 | 8 |
| 12397G | 5.9 | 11 | 9545G   | 6.3 | 9 | 13966G  | 6.5 | 8 |
| 8994A  | 5.9 | 11 | 12810G  | 6.3 | 9 | 9180G   | 6.5 | 8 |
| 9932A  | 5.9 | 11 | 16188T  | 6.3 | 9 | 11176A  | 6.5 | 8 |
| 15784C | 5.9 | 11 | 16245T  | 6.3 | 9 | 499A    | 6.5 | 8 |
| 13368A | 5.9 | 11 | 8277C   | 6.3 | 9 | 8155A   | 6.5 | 8 |
| 16271C | 5.9 | 11 | 16214T  | 6.3 | 9 | 16286T  | 6.5 | 8 |
| 16224C | 5.9 | 11 | 930A    | 6.3 | 9 | 1442A   | 6.5 | 8 |
| 16185T | 5.9 | 11 | 16311C! | 6.3 | 9 | 15326G! | 6.5 | 8 |
| 16264T | 5.9 | 11 | 4655A   | 6.3 | 9 | 3027C   | 6.5 | 8 |
| 6260A  | 6.1 | 10 | 3438A   | 6.3 | 9 | 5894G   | 6.5 | 8 |
| 13934T | 6.1 | 10 | 5492C   | 6.3 | 9 | 16497G  | 6.5 | 8 |
| 16167T | 6.1 | 10 | 8790A   | 6.3 | 9 | 94A     | 6.5 | 8 |
| 6261A  | 6.1 | 10 | 16147T  | 6.3 | 9 | 3693A   | 6.5 | 8 |
| 16263C | 6.1 | 10 | 2706G!  | 6.3 | 9 | 13651G  | 6.5 | 8 |
| 3531A  | 6.1 | 10 | 14182C  | 6.3 | 9 | 15106A  | 6.5 | 8 |
| 8705C  | 6.1 | 10 | 9438A   | 6.3 | 9 | 3777C   | 6.5 | 8 |
| 3915A  | 6.1 | 10 | 1709A   | 6.3 | 9 | 153G!   | 6.5 | 8 |
| 182T   | 6.1 | 10 | 5580C   | 6.3 | 9 | 16187T! | 6.5 | 8 |
| 10915C | 6.1 | 10 | 12618A  | 6.3 | 9 | 16166G  | 6.7 | 7 |
| 11440A | 6.1 | 10 | 318C    | 6.3 | 9 | 14693G  | 6.7 | 7 |
| 7521A  | 6.1 | 10 | 146C!   | 6.3 | 9 | 1842G   | 6.7 | 7 |
| 16284G | 6.1 | 10 | 310C    | 6.3 | 9 | 7961C   | 6.7 | 7 |
| 11314G | 6.1 | 10 | 14110C  | 6.3 | 9 | 16259T  | 6.7 | 7 |
| 15217A | 6.1 | 10 | 12414C  | 6.3 | 9 | 16360T  | 6.7 | 7 |
| 7598A  | 6.1 | 10 | 16400T  | 6.5 | 8 | 16066G  | 6.7 | 7 |
| 13500C | 6.1 | 10 | 16124C  | 6.5 | 8 | 14148G  | 6.7 | 7 |
| 15110A | 6.1 | 10 | 16465T  | 6.5 | 8 | 4454C   | 6.7 | 7 |
| 7861C  | 6.1 | 10 | 11893G  | 6.5 | 8 | 471C    | 6.7 | 7 |
| 16309G | 6.1 | 10 | 9380A   | 6.5 | 8 | 10750G  | 6.7 | 7 |
| 235G   | 6.1 | 10 | 6216C   | 6.5 | 8 | 13768C  | 6.7 | 7 |
| 15148A | 6.1 | 10 | 2626C   | 6.5 | 8 | 11377A  | 6.7 | 7 |
| 13928C | 6.1 | 10 | 15941C  | 6.5 | 8 | 4924A   | 6.7 | 7 |
| 6221C  | 6.1 | 10 | 7765G   | 6.5 | 8 | 11204C  | 6.7 | 7 |
| 12501A | 6.1 | 10 | 3666A   | 6.5 | 8 | 14687G  | 6.7 | 7 |
| 16354T | 6.3 | 9  | 14861A  | 6.5 | 8 | 217C    | 6.7 | 7 |
| 3396C  | 6.3 | 9  | 10325A  | 6.5 | 8 | 4025T   | 6.7 | 7 |
| 8843C  | 6.3 | 9  | 11002G  | 6.5 | 8 | 16222T  | 6.7 | 7 |
| 9053A  | 6.3 | 9  | 10454C  | 6.5 | 8 | 2352C   | 6.7 | 7 |
| 16316G | 6.3 | 9  | 11944C  | 6.5 | 8 | 8269A   | 6.7 | 7 |
| 9377G  | 6.3 | 9  | 12372A  | 6.5 | 8 | 482C    | 6.7 | 7 |
| 4562G  | 6.3 | 9  | 8188G   | 6.5 | 8 | 456T    | 6.7 | 7 |

|        |     |   |         |   |   |         |     |   |
|--------|-----|---|---------|---|---|---------|-----|---|
| 710C   | 6.7 | 7 | 15497A  | 7 | 6 | 6392C   | 7   | 6 |
| 8557A  | 6.7 | 7 | 16240G  | 7 | 6 | 2833G   | 7   | 6 |
| 5821A  | 6.7 | 7 | 8572A   | 7 | 6 | 16318G  | 7   | 6 |
| 1005C  | 6.7 | 7 | 3483A   | 7 | 6 | 11299C  | 7   | 6 |
| 15883A | 6.7 | 7 | 11696A  | 7 | 6 | 15479C  | 7   | 6 |
| 827G   | 6.7 | 7 | 12507G  | 7 | 6 | 15629C  | 7   | 6 |
| 11167G | 6.7 | 7 | 14133G  | 7 | 6 | 10978G  | 7   | 6 |
| 16342C | 6.7 | 7 | 11809C  | 7 | 6 | 4093G   | 7   | 6 |
| 13830C | 6.7 | 7 | 7403G   | 7 | 6 | 6719C   | 7   | 6 |
| 10101C | 6.7 | 7 | 12373G  | 7 | 6 | 2416C   | 7   | 6 |
| 16207G | 6.7 | 7 | 16217C  | 7 | 6 | 16189C! | 7   | 6 |
| 14502C | 6.7 | 7 | 12957C  | 7 | 6 | 15301A  | 7   | 6 |
| 12696C | 6.7 | 7 | 15470C  | 7 | 6 | 12234G  | 7   | 6 |
| 15721C | 6.7 | 7 | 16104T  | 7 | 6 | 16318T  | 7   | 6 |
| 15927A | 6.7 | 7 | 12236A  | 7 | 6 | 16463G  | 7   | 6 |
| 12477C | 6.7 | 7 | 10410C  | 7 | 6 | 16327T  | 7   | 6 |
| 3421A  | 6.7 | 7 | 7859A   | 7 | 6 | 13656C  | 7   | 6 |
| 6023A  | 6.7 | 7 | 5319G   | 7 | 6 | 16114A  | 7   | 6 |
| 9950C  | 6.7 | 7 | 10754G  | 7 | 6 | 723G    | 7   | 6 |
| 16069T | 6.7 | 7 | 373G    | 7 | 6 | 16362C! | 7   | 6 |
| 6755A  | 6.7 | 7 | 7202G   | 7 | 6 | 6680C   | 7   | 6 |
| 9266A  | 6.7 | 7 | 15928A  | 7 | 6 | 16017C  | 7   | 6 |
| 4703C  | 6.7 | 7 | 15940C  | 7 | 6 | 6752G   | 7   | 6 |
| 8772C  | 6.7 | 7 | 11887A  | 7 | 6 | 225A!   | 7   | 6 |
| 15067C | 6.7 | 7 | 6152C   | 7 | 6 | 951A    | 7.3 | 5 |
| 4991A  | 6.7 | 7 | 114T    | 7 | 6 | 13395G  | 7.3 | 5 |
| 15043A | 6.7 | 7 | 4646C   | 7 | 6 | 127C    | 7.3 | 5 |
| 6383A  | 6.7 | 7 | 16344T  | 7 | 6 | 10810C  | 7.3 | 5 |
| 9755A  | 6.7 | 7 | 533G    | 7 | 6 | 3796G   | 7.3 | 5 |
| 3398C  | 6.7 | 7 | 13542G  | 7 | 6 | 7960G   | 7.3 | 5 |
| 4491A  | 6.7 | 7 | 6182A   | 7 | 6 | 6629G   | 7.3 | 5 |
| 215G   | 6.7 | 7 | 6253C   | 7 | 6 | 960.XC  | 7.3 | 5 |
| 13722G | 6.7 | 7 | 5442C   | 7 | 6 | 3849A   | 7.3 | 5 |
| 10172A | 6.7 | 7 | 16298C! | 7 | 6 | 316A    | 7.3 | 5 |
| 1503A  | 6.7 | 7 | 5656G   | 7 | 6 | 10256C  | 7.3 | 5 |
| 385G   | 6.7 | 7 | 131C    | 7 | 6 | 14178C  | 7.3 | 5 |
| 6815C  | 6.7 | 7 | 15115C  | 7 | 6 | 5483C   | 7.3 | 5 |
| 8440G  | 6.7 | 7 | 12879C  | 7 | 6 | 16037G  | 7.3 | 5 |
| 15734A | 6.7 | 7 | 3290C   | 7 | 6 | 15553A  | 7.3 | 5 |
| 4820A  | 6.7 | 7 | 14544A  | 7 | 6 | 6734A   | 7.3 | 5 |
| 15355A | 6.7 | 7 | 9128C   | 7 | 6 | 980C    | 7.3 | 5 |
| 6366A  | 6.7 | 7 | 3918A   | 7 | 6 | 12136C  | 7.3 | 5 |
| 16223T | 6.7 | 7 | 15613G  | 7 | 6 | 8701G   | 7.3 | 5 |
| 4048A  | 6.7 | 7 | 7424G   | 7 | 6 | 485C    | 7.3 | 5 |
| 455.1T | 6.7 | 7 | 11151T  | 7 | 6 | 1811G   | 7.3 | 5 |
| 8614C  | 6.7 | 7 | 188G    | 7 | 6 | 5558G   | 7.3 | 5 |
| 8027A  | 6.7 | 7 | 8865A   | 7 | 6 | 12681C  | 7.3 | 5 |
| 6297C  | 6.7 | 7 | 4232C   | 7 | 6 | 789C    | 7.3 | 5 |
| 16381C | 6.7 | 7 | 8149G   | 7 | 6 | 11590G  | 7.3 | 5 |
| 182T!  | 6.7 | 7 | 7364G   | 7 | 6 | 10589A  | 7.3 | 5 |
| 12127A | 7   | 6 | 13681G  | 7 | 6 | 15530C  | 7.3 | 5 |
| 210G   | 7   | 6 | 8152A   | 7 | 6 | 2156.1A | 7.3 | 5 |
| 16075C | 7   | 6 | 7789A   | 7 | 6 | 8383C   | 7.3 | 5 |
| 2887C  | 7   | 6 | 9899C   | 7 | 6 | 8563G   | 7.3 | 5 |
| 7299G  | 7   | 6 | 73G!    | 7 | 6 | 769A    | 7.3 | 5 |
| 6267A  | 7   | 6 | 7269A   | 7 | 6 | 11969A  | 7.3 | 5 |
| 14581C | 7   | 6 | 6026A   | 7 | 6 | 10463C  | 7.3 | 5 |
| 9181G  | 7   | 6 | 9233C   | 7 | 6 | 44.1C   | 7.3 | 5 |

|        |     |   |         |     |   |        |     |   |
|--------|-----|---|---------|-----|---|--------|-----|---|
| 9329A  | 7.3 | 5 | 6446A   | 7.3 | 5 | 72C    | 7.6 | 4 |
| 14831A | 7.3 | 5 | 14002G  | 7.3 | 5 | 257G   | 7.6 | 4 |
| 15412C | 7.3 | 5 | 466C    | 7.3 | 5 | 16219G | 7.6 | 4 |
| 8842G  | 7.3 | 5 | 10586A  | 7.3 | 5 | 8730G  | 7.6 | 4 |
| 9449T  | 7.3 | 5 | 3434G   | 7.3 | 5 | 4767G  | 7.6 | 4 |
| 12651A | 7.3 | 5 | 12950G  | 7.3 | 5 | 13326C | 7.6 | 4 |
| 4011T  | 7.3 | 5 | 12468C  | 7.3 | 5 | 3548C  | 7.6 | 4 |
| 15218G | 7.3 | 5 | 16255A  | 7.3 | 5 | 5746A  | 7.6 | 4 |
| 15109C | 7.3 | 5 | 7389C   | 7.3 | 5 | 12026G | 7.6 | 4 |
| 5261A  | 7.3 | 5 | 15061G  | 7.3 | 5 | 11864C | 7.6 | 4 |
| 9156G  | 7.3 | 5 | 16154C  | 7.3 | 5 | 15323A | 7.6 | 4 |
| 15519C | 7.3 | 5 | 11353C  | 7.3 | 5 | 11339C | 7.6 | 4 |
| 11150A | 7.3 | 5 | 9682C   | 7.3 | 5 | 16468C | 7.6 | 4 |
| 16299G | 7.3 | 5 | 8567C   | 7.3 | 5 | 13470G | 7.6 | 4 |
| 7444A  | 7.3 | 5 | 4937C   | 7.3 | 5 | 16212G | 7.6 | 4 |
| 14118G | 7.3 | 5 | 11465C  | 7.3 | 5 | 6722A  | 7.6 | 4 |
| 9758C  | 7.3 | 5 | 12361G  | 7.3 | 5 | 8618C  | 7.6 | 4 |
| 10646A | 7.3 | 5 | 249G    | 7.3 | 5 | 5393C  | 7.6 | 4 |
| 10283G | 7.3 | 5 | 8167C   | 7.3 | 5 | 8410T  | 7.6 | 4 |
| 8387A  | 7.3 | 5 | 236C    | 7.3 | 5 | 16302G | 7.6 | 4 |
| 13269G | 7.3 | 5 | 5899.1C | 7.3 | 5 | 1664A  | 7.6 | 4 |
| 14793G | 7.3 | 5 | 16166d  | 7.3 | 5 | 7762A  | 7.6 | 4 |
| 5250C  | 7.3 | 5 | 3552C   | 7.3 | 5 | 10295G | 7.6 | 4 |
| 15346A | 7.3 | 5 | 16134T  | 7.3 | 5 | 3221G  | 7.6 | 4 |
| 8584A  | 7.3 | 5 | 10700G  | 7.3 | 5 | 13404C | 7.6 | 4 |
| 6413C  | 7.3 | 5 | 4113A   | 7.3 | 5 | 1211A  | 7.6 | 4 |
| 15454C | 7.3 | 5 | 15944d  | 7.3 | 5 | 15769G | 7.6 | 4 |
| 4047C  | 7.3 | 5 | 16173T  | 7.3 | 5 | 13967T | 7.6 | 4 |
| 16335G | 7.3 | 5 | 2483C   | 7.3 | 5 | 408A   | 7.6 | 4 |
| 5153G  | 7.3 | 5 | 13710G  | 7.3 | 5 | 12441C | 7.6 | 4 |
| 11365C | 7.3 | 5 | 16048A  | 7.3 | 5 | 15204C | 7.6 | 4 |
| 3397G  | 7.3 | 5 | 16293C  | 7.3 | 5 | 10310A | 7.6 | 4 |
| 4917G  | 7.3 | 5 | 13437C  | 7.3 | 5 | 5004C  | 7.6 | 4 |
| 6671C  | 7.3 | 5 | 5046A   | 7.3 | 5 | 9123A  | 7.6 | 4 |
| 9861C  | 7.3 | 5 | 1243C   | 7.3 | 5 | 14325C | 7.6 | 4 |
| 5964C  | 7.3 | 5 | 3505G   | 7.3 | 5 | 9615C  | 7.6 | 4 |
| 9667G  | 7.3 | 5 | 14668T  | 7.3 | 5 | 7581C  | 7.6 | 4 |
| 8222C  | 7.3 | 5 | 106d    | 7.3 | 5 | 10166C | 7.6 | 4 |
| 14798C | 7.3 | 5 | 107d    | 7.3 | 5 | 9386C  | 7.6 | 4 |
| 13281C | 7.3 | 5 | 108d    | 7.3 | 5 | 14488C | 7.6 | 4 |
| 16163G | 7.3 | 5 | 109d    | 7.3 | 5 | 5082C  | 7.6 | 4 |
| 12561A | 7.3 | 5 | 110d    | 7.3 | 5 | 5302C  | 7.6 | 4 |
| 5262A  | 7.3 | 5 | 6378C   | 7.3 | 5 | 239C   | 7.6 | 4 |
| 16231C | 7.3 | 5 | 151T!   | 7.3 | 5 | 11611A | 7.6 | 4 |
| 16241G | 7.3 | 5 | 8701G!  | 7.3 | 5 | 10237C | 7.6 | 4 |
| 14769G | 7.3 | 5 | 16289G  | 7.3 | 5 | 6185C  | 7.6 | 4 |
| 16195C | 7.3 | 5 | 4080C   | 7.6 | 4 | 1393A  | 7.6 | 4 |
| 4959A  | 7.3 | 5 | 5978G   | 7.6 | 4 | 15862C | 7.6 | 4 |
| 14233G | 7.3 | 5 | 2442C   | 7.6 | 4 | 15459T | 7.6 | 4 |
| 3882A  | 7.3 | 5 | 16183G  | 7.6 | 4 | 11992C | 7.6 | 4 |
| 3826C  | 7.3 | 5 | 8598C   | 7.6 | 4 | 13032G | 7.6 | 4 |
| 5426C  | 7.3 | 5 | 4639C   | 7.6 | 4 | 291.1A | 7.6 | 4 |
| 8838A  | 7.3 | 5 | 10993A  | 7.6 | 4 | 11827C | 7.6 | 4 |
| 10289G | 7.3 | 5 | 534T    | 7.6 | 4 | 15040T | 7.6 | 4 |
| 247A   | 7.3 | 5 | 459d    | 7.6 | 4 | 7645C  | 7.6 | 4 |
| 16240C | 7.3 | 5 | 14212C  | 7.6 | 4 | 13020C | 7.6 | 4 |
| 13635C | 7.3 | 5 | 15766G  | 7.6 | 4 | 2772T  | 7.6 | 4 |
| 3105G  | 7.3 | 5 | 15299C  | 7.6 | 4 | 15287C | 7.6 | 4 |

|         |     |   |        |     |   |         |     |   |
|---------|-----|---|--------|-----|---|---------|-----|---|
| 16272G  | 7.6 | 4 | 12557T | 7.6 | 4 | 16174T  | 7.6 | 4 |
| 7830A   | 7.6 | 4 | 7897A  | 7.6 | 4 | 10654T  | 7.6 | 4 |
| 14239T  | 7.6 | 4 | 279C   | 7.6 | 4 | 14577C  | 7.6 | 4 |
| 6827C   | 7.6 | 4 | 12408C | 7.6 | 4 | 13637G  | 7.6 | 4 |
| 8206A   | 7.6 | 4 | 14605G | 7.6 | 4 | 6899A   | 7.6 | 4 |
| 16352C  | 7.6 | 4 | 8270T  | 7.6 | 4 | 11653G  | 7.6 | 4 |
| 3197C   | 7.6 | 4 | 16257T | 7.6 | 4 | 4775G   | 7.6 | 4 |
| 11143T  | 7.6 | 4 | 1406C  | 7.6 | 4 | 14034C  | 7.6 | 4 |
| 3847C   | 7.6 | 4 | 4225G  | 7.6 | 4 | 15626T  | 7.6 | 4 |
| 15562G  | 7.6 | 4 | 2755G  | 7.6 | 4 | 6359G   | 7.6 | 4 |
| 9101C   | 7.6 | 4 | 13215C | 7.6 | 4 | 7642A   | 7.6 | 4 |
| 3507T   | 7.6 | 4 | 9716C  | 7.6 | 4 | 3714G   | 7.6 | 4 |
| 12192A  | 7.6 | 4 | 6131G  | 7.6 | 4 | 16278T! | 7.6 | 4 |
| 4164G   | 7.6 | 4 | 11050C | 7.6 | 4 | 10397G  | 7.6 | 4 |
| 12753G  | 7.6 | 4 | 13212T | 7.6 | 4 | 5081C   | 7.6 | 4 |
| 14180C  | 7.6 | 4 | 2392C  | 7.6 | 4 | 16343G  | 7.6 | 4 |
| 12438C  | 7.6 | 4 | 16108T | 7.6 | 4 | 334C    | 7.6 | 4 |
| 13350G  | 7.6 | 4 | 14476A | 7.6 | 4 | 12609C  | 7.6 | 4 |
| 7270C   | 7.6 | 4 | 11065G | 7.6 | 4 | 10819G  | 7.6 | 4 |
| 508G    | 7.6 | 4 | 14971C | 7.6 | 4 | 8260C   | 7.6 | 4 |
| 15431A  | 7.6 | 4 | 9947A  | 7.6 | 4 | 14094C  | 7.6 | 4 |
| 16067T  | 7.6 | 4 | 13602C | 7.6 | 4 | 7055G   | 7.6 | 4 |
| 4596A   | 7.6 | 4 | 10031C | 7.6 | 4 | 11025C  | 7.6 | 4 |
| 7664A   | 7.6 | 4 | 11061T | 7.6 | 4 | 8005C   | 7.6 | 4 |
| 2308G   | 7.6 | 4 | 150T!  | 7.6 | 4 | 11017C  | 7.6 | 4 |
| 13650T  | 7.6 | 4 | 3391A  | 7.6 | 4 | 9938C   | 7.6 | 4 |
| 11935C  | 7.6 | 4 | 1692G  | 7.6 | 4 | 63C     | 7.6 | 4 |
| 7843G   | 7.6 | 4 | 4742C  | 7.6 | 4 | 14308C  | 7.6 | 4 |
| 11101G  | 7.6 | 4 | 10876G | 7.6 | 4 | 14384A  | 7.6 | 4 |
| 95C     | 7.6 | 4 | 12732C | 7.6 | 4 | 4856C   | 7.6 | 4 |
| 9647C   | 7.6 | 4 | 4814T  | 7.6 | 4 | 8485A   | 7.6 | 4 |
| 3644C   | 7.6 | 4 | 9098C  | 7.6 | 4 | 10790C  | 7.6 | 4 |
| 5557C   | 7.6 | 4 | 14063C | 7.6 | 4 | 5581G   | 7.6 | 4 |
| 5378G   | 7.6 | 4 | 16164G | 7.6 | 4 | 15663C  | 7.6 | 4 |
| 4769G!  | 7.6 | 4 | 4129G  | 7.6 | 4 | 1415A   | 7.6 | 4 |
| 12519C  | 7.6 | 4 | 9575A  | 7.6 | 4 | 8503C   | 7.6 | 4 |
| 9494G   | 7.6 | 4 | 3537G  | 7.6 | 4 | 15313C  | 7.6 | 4 |
| 11287C  | 7.6 | 4 | 16262T | 7.6 | 4 | 4541A   | 7.6 | 4 |
| 15511C  | 7.6 | 4 | 103A   | 7.6 | 4 | 8158G   | 7.6 | 4 |
| 8404C   | 7.6 | 4 | 11437C | 7.6 | 4 | 14371C  | 7.6 | 4 |
| 12311C  | 7.6 | 4 | 204C!  | 7.6 | 4 | 8093C   | 7.6 | 4 |
| 3866C   | 7.6 | 4 | 203A   | 7.6 | 4 | 8047C   | 7.6 | 4 |
| 8659G   | 7.6 | 4 | 3565G  | 7.6 | 4 | 9064A   | 7.6 | 4 |
| 9120G   | 7.6 | 4 | 11404G | 7.6 | 4 | 8389G   | 7.6 | 4 |
| 2387C   | 7.6 | 4 | 9077C  | 7.6 | 4 | 8793C   | 7.6 | 4 |
| 6249A   | 7.6 | 4 | 15458C | 7.6 | 4 | 16215G  | 7.6 | 4 |
| 10398G! | 7.6 | 4 | 7158G  | 7.6 | 4 | 1048T   | 7.6 | 4 |
| 4853A   | 7.6 | 4 | 11009C | 7.6 | 4 | 9299G   | 8.1 | 3 |
| 3447G   | 7.6 | 4 | 14000A | 7.6 | 4 | 6632C   | 8.1 | 3 |
| 15672C  | 7.6 | 4 | 16233G | 7.6 | 4 | 12954C  | 8.1 | 3 |
| 10966C  | 7.6 | 4 | 125C   | 7.6 | 4 | 72G     | 8.1 | 3 |
| 16438A  | 7.6 | 4 | 5460A! | 7.6 | 4 | 575T    | 8.1 | 3 |
| 10321C  | 7.6 | 4 | 6881G  | 7.6 | 4 | 4715G   | 8.1 | 3 |
| 9111C   | 7.6 | 4 | 4561C  | 7.6 | 4 | 4659A   | 8.1 | 3 |
| 14284T  | 7.6 | 4 | 9477A  | 7.6 | 4 | 4592C   | 8.1 | 3 |
| 16304C! | 7.6 | 4 | 15289C | 7.6 | 4 | 16162G  | 8.1 | 3 |
| 5201C   | 7.6 | 4 | 16144C | 7.6 | 4 | 14978G  | 8.1 | 3 |
| 5836G   | 7.6 | 4 | 1822C  | 7.6 | 4 | 8839A   | 8.1 | 3 |

|        |     |   |        |     |   |         |     |   |
|--------|-----|---|--------|-----|---|---------|-----|---|
| 5747G  | 8.1 | 3 | 8718G  | 8.1 | 3 | 15223T  | 8.1 | 3 |
| 12130C | 8.1 | 3 | 9325C  | 8.1 | 3 | 4654T   | 8.1 | 3 |
| 4452C  | 8.1 | 3 | 16170G | 8.1 | 3 | 11641G  | 8.1 | 3 |
| 9230C  | 8.1 | 3 | 10034C | 8.1 | 3 | 14344G  | 8.1 | 3 |
| 3504C  | 8.1 | 3 | 10007C | 8.1 | 3 | 9033G   | 8.1 | 3 |
| 9007G  | 8.1 | 3 | 7870C  | 8.1 | 3 | 6647G   | 8.1 | 3 |
| 8764A  | 8.1 | 3 | 6040G  | 8.1 | 3 | 13785T  | 8.1 | 3 |
| 5979A  | 8.1 | 3 | 7356A  | 8.1 | 3 | 2361A   | 8.1 | 3 |
| 10679G | 8.1 | 3 | 4336C  | 8.1 | 3 | 2056A   | 8.1 | 3 |
| 14902T | 8.1 | 3 | 721C   | 8.1 | 3 | 1809C   | 8.1 | 3 |
| 5301G  | 8.1 | 3 | 11719A | 8.1 | 3 | 6932G   | 8.1 | 3 |
| 8023C  | 8.1 | 3 | 12864C | 8.1 | 3 | 14025C  | 8.1 | 3 |
| 3745A  | 8.1 | 3 | 4916G  | 8.1 | 3 | 8812G   | 8.1 | 3 |
| 3511G  | 8.1 | 3 | 3753C  | 8.1 | 3 | 8869G   | 8.1 | 3 |
| 13050G | 8.1 | 3 | 1520C  | 8.1 | 3 | 227G    | 8.1 | 3 |
| 11087C | 8.1 | 3 | 3819T  | 8.1 | 3 | 9210G   | 8.1 | 3 |
| 9653C  | 8.1 | 3 | 13614G | 8.1 | 3 | 11899C  | 8.1 | 3 |
| 6353G  | 8.1 | 3 | 16391A | 8.1 | 3 | 10609C  | 8.1 | 3 |
| 9468G  | 8.1 | 3 | 10595C | 8.1 | 3 | 16327A  | 8.1 | 3 |
| 13431T | 8.1 | 3 | 11253C | 8.1 | 3 | 13933G  | 8.1 | 3 |
| 14221C | 8.1 | 3 | 41T    | 8.1 | 3 | 11476T  | 8.1 | 3 |
| 12366G | 8.1 | 3 | 15942C | 8.1 | 3 | 12279G  | 8.1 | 3 |
| 4313C  | 8.1 | 3 | 11020G | 8.1 | 3 | 739T    | 8.1 | 3 |
| 9148C  | 8.1 | 3 | 2283T  | 8.1 | 3 | 2758A   | 8.1 | 3 |
| 8470G  | 8.1 | 3 | 8573A  | 8.1 | 3 | 8545A   | 8.1 | 3 |
| 8723A  | 8.1 | 3 | 3145G  | 8.1 | 3 | 11257T  | 8.1 | 3 |
| 9078C  | 8.1 | 3 | 16525G | 8.1 | 3 | 3972G   | 8.1 | 3 |
| 4137T  | 8.1 | 3 | 4310G  | 8.1 | 3 | 12741T  | 8.1 | 3 |
| 14869A | 8.1 | 3 | 12153T | 8.1 | 3 | 7256T   | 8.1 | 3 |
| 6272G  | 8.1 | 3 | 16221T | 8.1 | 3 | 16184A  | 8.1 | 3 |
| 8950A  | 8.1 | 3 | 5918C  | 8.1 | 3 | 1391C   | 8.1 | 3 |
| 13386C | 8.1 | 3 | 13680T | 8.1 | 3 | 8887G   | 8.1 | 3 |
| 460C   | 8.1 | 3 | 15712G | 8.1 | 3 | 7657C   | 8.1 | 3 |
| 5054C  | 8.1 | 3 | 3744G  | 8.1 | 3 | 12654G  | 8.1 | 3 |
| 9708C  | 8.1 | 3 | 12662G | 8.1 | 3 | 13914A  | 8.1 | 3 |
| 8308G  | 8.1 | 3 | 11485C | 8.1 | 3 | 489C    | 8.1 | 3 |
| 7849T  | 8.1 | 3 | 10202T | 8.1 | 3 | 2158C   | 8.1 | 3 |
| 16220C | 8.1 | 3 | 12870T | 8.1 | 3 | 12396C  | 8.1 | 3 |
| 8164T  | 8.1 | 3 | 8296G  | 8.1 | 3 | 4772C   | 8.1 | 3 |
| 10316G | 8.1 | 3 | 8227C  | 8.1 | 3 | 15442G  | 8.1 | 3 |
| 14914G | 8.1 | 3 | 57C    | 8.1 | 3 | 2707C   | 8.1 | 3 |
| 9581C  | 8.1 | 3 | 14953T | 8.1 | 3 | 8460G   | 8.1 | 3 |
| 6776C  | 8.1 | 3 | 16366T | 8.1 | 3 | 10274C  | 8.1 | 3 |
| 3992T  | 8.1 | 3 | 8592A  | 8.1 | 3 | 9192A   | 8.1 | 3 |
| 735G   | 8.1 | 3 | 16258C | 8.1 | 3 | 8853G   | 8.1 | 3 |
| 9196A  | 8.1 | 3 | 14968C | 8.1 | 3 | 15119A  | 8.1 | 3 |
| 417A   | 8.1 | 3 | 16227G | 8.1 | 3 | 11177T  | 8.1 | 3 |
| 5911T  | 8.1 | 3 | 14203G | 8.1 | 3 | 16186T  | 8.1 | 3 |
| 6425C  | 8.1 | 3 | 8715C  | 8.1 | 3 | 7711C   | 8.1 | 3 |
| 12811C | 8.1 | 3 | 5495C  | 8.1 | 3 | 10598G  | 8.1 | 3 |
| 3345C  | 8.1 | 3 | 5582G  | 8.1 | 3 | 10345C  | 8.1 | 3 |
| 9117C  | 8.1 | 3 | 8200C  | 8.1 | 3 | 15262C  | 8.1 | 3 |
| 5999C  | 8.1 | 3 | 12133T | 8.1 | 3 | 12634G  | 8.1 | 3 |
| 8937C  | 8.1 | 3 | 15617A | 8.1 | 3 | 16126C! | 8.1 | 3 |
| 5480G  | 8.1 | 3 | 5498G  | 8.1 | 3 | 1007A   | 8.1 | 3 |
| 10535C | 8.1 | 3 | 9039A  | 8.1 | 3 | 13392C  | 8.1 | 3 |
| 4386C  | 8.1 | 3 | 11560G | 8.1 | 3 | 5774C   | 8.1 | 3 |
| 10724C | 8.1 | 3 | 9612A  | 8.1 | 3 | 15257A  | 8.1 | 3 |

|         |     |   |         |     |   |         |     |   |
|---------|-----|---|---------|-----|---|---------|-----|---|
| 15191C  | 8.1 | 3 | 14290C  | 8.1 | 3 | 10203A  | 8.1 | 3 |
| 15596A  | 8.1 | 3 | 5539G   | 8.1 | 3 | 1700C   | 8.1 | 3 |
| 13753C  | 8.1 | 3 | 11928G  | 8.1 | 3 | 4553C   | 8.1 | 3 |
| 12171G  | 8.1 | 3 | 89C     | 8.1 | 3 | 8119C   | 8.1 | 3 |
| 13015C  | 8.1 | 3 | 15661T  | 8.1 | 3 | 1303A   | 8.1 | 3 |
| 7076G   | 8.1 | 3 | 16317G  | 8.1 | 3 | 11984C  | 8.1 | 3 |
| 15812A  | 8.1 | 3 | 4203G   | 8.1 | 3 | 7912A   | 8.1 | 3 |
| 15662G  | 8.1 | 3 | 4218C   | 8.1 | 3 | 6527G   | 8.1 | 3 |
| 159C    | 8.1 | 3 | 4907C   | 8.1 | 3 | 14927G  | 8.1 | 3 |
| 8697A   | 8.1 | 3 | 15777A  | 8.1 | 3 | 750G!   | 8.1 | 3 |
| 15607G  | 8.1 | 3 | 14518G  | 8.1 | 3 | 4936T   | 8.1 | 3 |
| 14281T  | 8.1 | 3 | 5093C   | 8.1 | 3 | 3337A   | 8.1 | 3 |
| 2380T   | 8.1 | 3 | 4977C   | 8.1 | 3 | 6407C   | 8.1 | 3 |
| 11647T  | 8.1 | 3 | 14766T! | 8.1 | 3 | 1193C   | 8.1 | 3 |
| 7310C   | 8.1 | 3 | 11884G  | 8.1 | 3 | 16230G  | 8.1 | 3 |
| 16296T  | 8.1 | 3 | 11569C  | 8.1 | 3 | 6956C   | 8.1 | 3 |
| 13965C  | 8.1 | 3 | 16353T  | 8.1 | 3 | 3720G   | 8.1 | 3 |
| 15935G  | 8.1 | 3 | 7822G   | 8.1 | 3 | 5390G   | 8.1 | 3 |
| 6524C   | 8.1 | 3 | 498d    | 8.1 | 3 | 16181G  | 8.1 | 3 |
| 9948A   | 8.1 | 3 | 3996T   | 8.1 | 3 | 9656C   | 8.1 | 3 |
| 3338C   | 8.1 | 3 | 7340A   | 8.1 | 3 | 12720G  | 8.1 | 3 |
| 16297C  | 8.1 | 3 | 11875C  | 8.1 | 3 | 965.XC  | 8.1 | 3 |
| 8419C   | 8.1 | 3 | 15077A  | 8.1 | 3 | 1189C   | 8.1 | 3 |
| 16146G  | 8.1 | 3 | 12616C  | 8.1 | 3 | 6929G   | 8.1 | 3 |
| 15601C  | 8.1 | 3 | 11389T  | 8.1 | 3 | 2083C   | 8.1 | 3 |
| 7283C   | 8.1 | 3 | 3480G   | 8.1 | 3 | 629C    | 8.1 | 3 |
| 13260C  | 8.1 | 3 | 2831A   | 8.1 | 3 | 13111C  | 8.1 | 3 |
| 3203G   | 8.1 | 3 | 4117C   | 8.1 | 3 | 15799G  | 8.1 | 3 |
| 13834G  | 8.1 | 3 | 9305A   | 8.1 | 3 | 11470G  | 8.1 | 3 |
| 16294T! | 8.1 | 3 | 2836T   | 8.1 | 3 | 6528T   | 8.1 | 3 |
| 4695C   | 8.1 | 3 | 1452C   | 8.1 | 3 | 1694C   | 8.1 | 3 |
| 11383C  | 8.1 | 3 | 16193d  | 8.1 | 3 | 7775A   | 8.1 | 3 |
| 16524G  | 8.1 | 3 | 5300T   | 8.1 | 3 | 6257A   | 8.1 | 3 |
| 246C    | 8.1 | 3 | 5592G   | 8.1 | 3 | 13401C  | 8.1 | 3 |
| 12432T  | 8.1 | 3 | 211G    | 8.1 | 3 | 325T    | 8.1 | 3 |
| 11380G  | 8.1 | 3 | 10493C  | 8.1 | 3 | 431A    | 8.1 | 3 |
| 5298G   | 8.1 | 3 | 11881T  | 8.1 | 3 | 11923G  | 8.1 | 3 |
| 11172G  | 8.1 | 3 | 7852A   | 8.1 | 3 | 6284G   | 8.1 | 3 |
| 4136G   | 8.1 | 3 | 9962A   | 8.1 | 3 | 6071C   | 8.1 | 3 |
| 12714C  | 8.1 | 3 | 4824G   | 8.1 | 3 | 10861C  | 8.1 | 3 |
| 3204T   | 8.1 | 3 | 960.1C  | 8.1 | 3 | 15900C  | 8.1 | 3 |
| 11197T  | 8.1 | 3 | 8784G   | 8.1 | 3 | 3513T   | 8.1 | 3 |
| 12882T  | 8.1 | 3 | 5744A   | 8.1 | 3 | 15803A  | 8.1 | 3 |
| 10042G  | 8.1 | 3 | 14750G  | 8.1 | 3 | 3336C   | 8.1 | 3 |
| 13422G  | 8.1 | 3 | 5417A   | 8.1 | 3 | 16171G  | 8.1 | 3 |
| 6515C   | 8.1 | 3 | 8860G!  | 8.1 | 3 | 16166C  | 8.1 | 3 |
| 9389G   | 8.1 | 3 | 14800T  | 8.1 | 3 | 15968C  | 8.1 | 3 |
| 8104C   | 8.1 | 3 | 1040C   | 8.1 | 3 | 199C!   | 8.1 | 3 |
| 7828G   | 8.1 | 3 | 338T    | 8.1 | 3 | 6713T   | 8.1 | 3 |
| 12338C  | 8.1 | 3 | 6480A   | 8.1 | 3 | 8943T   | 8.1 | 3 |
| 6791G   | 8.1 | 3 | 3816G   | 8.1 | 3 | 5291C   | 8.1 | 3 |
| 15908C  | 8.1 | 3 | 7624C   | 8.1 | 3 | 5063C   | 8.1 | 3 |
| 16365T  | 8.1 | 3 | 7569G   | 8.1 | 3 | 14152G  | 8.1 | 3 |
| 10238C  | 8.1 | 3 | 3738T   | 8.1 | 3 | 4928C   | 8.1 | 3 |
| 15905C  | 8.1 | 3 | 12121C  | 8.1 | 3 | 189G!   | 8.1 | 3 |
| 15221A  | 8.1 | 3 | 9509C   | 8.1 | 3 | 16292T! | 8.1 | 3 |
| 14683G  | 8.1 | 3 | 374G    | 8.1 | 3 | 13263G  | 8.1 | 3 |
| 9809G   | 8.1 | 3 | 11116C  | 8.1 | 3 | 9127G   | 8.1 | 3 |



|         |     |   |         |     |   |        |     |   |
|---------|-----|---|---------|-----|---|--------|-----|---|
| 10245C  | 8.1 | 3 | 14302C  | 8.1 | 3 | 7604A  | 8.8 | 2 |
| 4363C   | 8.1 | 3 | 4197T   | 8.1 | 3 | 4859C  | 8.8 | 2 |
| 6806G   | 8.1 | 3 | 15622C  | 8.1 | 3 | 14258A | 8.8 | 2 |
| 15211T  | 8.1 | 3 | 13174C  | 8.1 | 3 | 9356T  | 8.8 | 2 |
| 12354C  | 8.1 | 3 | 265C    | 8.1 | 3 | 9986A  | 8.8 | 2 |
| 6092C   | 8.1 | 3 | 16309G! | 8.1 | 3 | 14129T | 8.8 | 2 |
| 10801A  | 8.1 | 3 | 10920T  | 8.1 | 3 | 7975G  | 8.8 | 2 |
| 8392A   | 8.1 | 3 | 7972G   | 8.1 | 3 | 10314T | 8.8 | 2 |
| 12092A  | 8.1 | 3 | 198T!   | 8.1 | 3 | 10410A | 8.8 | 2 |
| 15226G  | 8.1 | 3 | 6716G   | 8.8 | 2 | 15646T | 8.8 | 2 |
| 813G    | 8.1 | 3 | 263G    | 8.8 | 2 | 7412T  | 8.8 | 2 |
| 3736A   | 8.1 | 3 | 3388A   | 8.8 | 2 | 16456A | 8.8 | 2 |
| 6896C   | 8.1 | 3 | 6173T   | 8.8 | 2 | 4435G  | 8.8 | 2 |
| 4248C   | 8.1 | 3 | 4769G   | 8.8 | 2 | 4674G  | 8.8 | 2 |
| 8548C   | 8.1 | 3 | 8679G   | 8.8 | 2 | 7471T  | 8.8 | 2 |
| 3308C   | 8.1 | 3 | 8065A   | 8.8 | 2 | 8429T  | 8.8 | 2 |
| 16111T! | 8.1 | 3 | 113T    | 8.8 | 2 | 15844G | 8.8 | 2 |
| 111d    | 8.1 | 3 | 444G    | 8.8 | 2 | 14467G | 8.8 | 2 |
| 6374C   | 8.1 | 3 | 11140T  | 8.8 | 2 | 8478T  | 8.8 | 2 |
| 14944T  | 8.1 | 3 | 11233C  | 8.8 | 2 | 1531T  | 8.8 | 2 |
| 12816T  | 8.1 | 3 | 42.1G   | 8.8 | 2 | 9722C  | 8.8 | 2 |
| 5563A   | 8.1 | 3 | 8468T   | 8.8 | 2 | 12454A | 8.8 | 2 |
| 15317A  | 8.1 | 3 | 11950G  | 8.8 | 2 | 15016T | 8.8 | 2 |
| 3593C   | 8.1 | 3 | 15789T  | 8.8 | 2 | 4418C  | 8.8 | 2 |
| 11908G  | 8.1 | 3 | 8537G   | 8.8 | 2 | 5213T  | 8.8 | 2 |
| 2232.1A | 8.1 | 3 | 7080C   | 8.8 | 2 | 6351C  | 8.8 | 2 |
| 16254G  | 8.1 | 3 | 8348G   | 8.8 | 2 | 13813A | 8.8 | 2 |
| 5255T   | 8.1 | 3 | 9698C   | 8.8 | 2 | 14200C | 8.8 | 2 |
| 10640C  | 8.1 | 3 | 8286C   | 8.8 | 2 | 260A   | 8.8 | 2 |
| 711C    | 8.1 | 3 | 327T    | 8.8 | 2 | 761G   | 8.8 | 2 |
| 12280G  | 8.1 | 3 | 11428T  | 8.8 | 2 | 15781T | 8.8 | 2 |
| 8577G   | 8.1 | 3 | 10632C  | 8.8 | 2 | 3970T  | 8.8 | 2 |
| 10667C  | 8.1 | 3 | 4131G   | 8.8 | 2 | 7148C  | 8.8 | 2 |
| 6179A   | 8.1 | 3 | 15047A  | 8.8 | 2 | 14319C | 8.8 | 2 |
| 4973C   | 8.1 | 3 | 9150G   | 8.8 | 2 | 15380G | 8.8 | 2 |
| 5252A   | 8.1 | 3 | 10192T  | 8.8 | 2 | 8841T  | 8.8 | 2 |
| 7844G   | 8.1 | 3 | 13203G  | 8.8 | 2 | 12401T | 8.8 | 2 |
| 14128G  | 8.1 | 3 | 8645G   | 8.8 | 2 | 3615G  | 8.8 | 2 |
| 11701C  | 8.1 | 3 | 10365A  | 8.8 | 2 | 493G   | 8.8 | 2 |
| 15449C  | 8.1 | 3 | 12636T  | 8.8 | 2 | 6266G  | 8.8 | 2 |
| 13563G  | 8.1 | 3 | 7379A   | 8.8 | 2 | 1018A  | 8.8 | 2 |
| 15697C  | 8.1 | 3 | 8512G   | 8.8 | 2 | 9316C  | 8.8 | 2 |
| 15184C  | 8.1 | 3 | 16111A  | 8.8 | 2 | 4024G  | 8.8 | 2 |
| 5951G   | 8.1 | 3 | 7196T   | 8.8 | 2 | 10044G | 8.8 | 2 |
| 869T    | 8.1 | 3 | 12070A  | 8.8 | 2 | 10124C | 8.8 | 2 |
| 459.1C  | 8.1 | 3 | 983T    | 8.8 | 2 | 14956C | 8.8 | 2 |
| 463T    | 8.1 | 3 | 4883T   | 8.8 | 2 | 13889A | 8.8 | 2 |
| 15951G  | 8.1 | 3 | 9110C   | 8.8 | 2 | 12642G | 8.8 | 2 |
| 9165C   | 8.1 | 3 | 7119A   | 8.8 | 2 | 16286G | 8.8 | 2 |
| 16269G  | 8.1 | 3 | 7013A   | 8.8 | 2 | 15833T | 8.8 | 2 |
| 7673G   | 8.1 | 3 | 2851G   | 8.8 | 2 | 9804A  | 8.8 | 2 |
| 11959G  | 8.1 | 3 | 14420T  | 8.8 | 2 | 5051G  | 8.8 | 2 |
| 3588T   | 8.1 | 3 | 15394C  | 8.8 | 2 | 12384C | 8.8 | 2 |
| 3828G   | 8.1 | 3 | 4733C   | 8.8 | 2 | 12648G | 8.8 | 2 |
| 7954C   | 8.1 | 3 | 447G    | 8.8 | 2 | 15139C | 8.8 | 2 |
| 16320T! | 8.1 | 3 | 5249C   | 8.8 | 2 | 15175T | 8.8 | 2 |
| 8964T   | 8.1 | 3 | 16312G  | 8.8 | 2 | 8343G  | 8.8 | 2 |
| 15440C  | 8.1 | 3 | 7295G   | 8.8 | 2 | 722T   | 8.8 | 2 |

|        |     |   |        |     |   |        |     |   |
|--------|-----|---|--------|-----|---|--------|-----|---|
| 4796T  | 8.8 | 2 | 11788T | 8.8 | 2 | 9531G  | 8.8 | 2 |
| 12855G | 8.8 | 2 | 4317d  | 8.8 | 2 | 11764G | 8.8 | 2 |
| 16482G | 8.8 | 2 | 2159C  | 8.8 | 2 | 295A   | 8.8 | 2 |
| 7325G  | 8.8 | 2 | 12904G | 8.8 | 2 | 5823G  | 8.8 | 2 |
| 13953C | 8.8 | 2 | 15658T | 8.8 | 2 | 8388C  | 8.8 | 2 |
| 11155T | 8.8 | 2 | 7382A  | 8.8 | 2 | 10658G | 8.8 | 2 |
| 14185T | 8.8 | 2 | 16220G | 8.8 | 2 | 241G   | 8.8 | 2 |
| 4793G  | 8.8 | 2 | 8596G  | 8.8 | 2 | 1095C  | 8.8 | 2 |
| 9833C  | 8.8 | 2 | 8911C  | 8.8 | 2 | 13167G | 8.8 | 2 |
| 10253C | 8.8 | 2 | 3535C  | 8.8 | 2 | 16071T | 8.8 | 2 |
| 5348T  | 8.8 | 2 | 5618C  | 8.8 | 2 | 9738A  | 8.8 | 2 |
| 3335C  | 8.8 | 2 | 16258G | 8.8 | 2 | 12793C | 8.8 | 2 |
| 14162A | 8.8 | 2 | 9921A  | 8.8 | 2 | 8143C  | 8.8 | 2 |
| 11971T | 8.8 | 2 | 6410T  | 8.8 | 2 | 462T   | 8.8 | 2 |
| 13101C | 8.8 | 2 | 3200C  | 8.8 | 2 | 242T   | 8.8 | 2 |
| 12490G | 8.8 | 2 | 4580A  | 8.8 | 2 | 13308G | 8.8 | 2 |
| 13711A | 8.8 | 2 | 14770T | 8.8 | 2 | 271T   | 8.8 | 2 |
| 14071G | 8.8 | 2 | 5420C  | 8.8 | 2 | 9083C  | 8.8 | 2 |
| 13572C | 8.8 | 2 | 11337G | 8.8 | 2 | 4696C  | 8.8 | 2 |
| 335G   | 8.8 | 2 | 16216G | 8.8 | 2 | 11623T | 8.8 | 2 |
| 14220G | 8.8 | 2 | 15250T | 8.8 | 2 | 13899C | 8.8 | 2 |
| 7220C  | 8.8 | 2 | 16203G | 8.8 | 2 | 13398G | 8.8 | 2 |
| 14727C | 8.8 | 2 | 8910T  | 8.8 | 2 | 5276G  | 8.8 | 2 |
| 9801A  | 8.8 | 2 | 14121T | 8.8 | 2 | 4790G  | 8.8 | 2 |
| 16244A | 8.8 | 2 | 8179G  | 8.8 | 2 | 13506T | 8.8 | 2 |
| 15001C | 8.8 | 2 | 9887C  | 8.8 | 2 | 222T   | 8.8 | 2 |
| 8266G  | 8.8 | 2 | 11620G | 8.8 | 2 | 3456C  | 8.8 | 2 |
| 4107T  | 8.8 | 2 | 12795A | 8.8 | 2 | 9145A  | 8.8 | 2 |
| 13620C | 8.8 | 2 | 8982G  | 8.8 | 2 | 8868C  | 8.8 | 2 |
| 197G   | 8.8 | 2 | 72C!   | 8.8 | 2 | 5162C  | 8.8 | 2 |
| 55C    | 8.8 | 2 | 14629T | 8.8 | 2 | 8727T  | 8.8 | 2 |
| 11410C | 8.8 | 2 | 569T   | 8.8 | 2 | 7891T  | 8.8 | 2 |
| 13818C | 8.8 | 2 | 8706G  | 8.8 | 2 | 12891T | 8.8 | 2 |
| 14869C | 8.8 | 2 | 4227G  | 8.8 | 2 | 13557G | 8.8 | 2 |
| 2835T  | 8.8 | 2 | 6150A  | 8.8 | 2 | 15367T | 8.8 | 2 |
| 10115C | 8.8 | 2 | 4739T  | 8.8 | 2 | 4829G  | 8.8 | 2 |
| 186T   | 8.8 | 2 | 3547G  | 8.8 | 2 | 16063C | 8.8 | 2 |
| 10211T | 8.8 | 2 | 13143C | 8.8 | 2 | 10497T | 8.8 | 2 |
| 9620T  | 8.8 | 2 | 9336G  | 8.8 | 2 | 9632G  | 8.8 | 2 |
| 11152C | 8.8 | 2 | 12972G | 8.8 | 2 | 9052G  | 8.8 | 2 |
| 196C   | 8.8 | 2 | 11671G | 8.8 | 2 | 11252G | 8.8 | 2 |
| 11399C | 8.8 | 2 | 1715T  | 8.8 | 2 | 13917G | 8.8 | 2 |
| 186A   | 8.8 | 2 | 6248C  | 8.8 | 2 | 12123T | 8.8 | 2 |
| 11191T | 8.8 | 2 | 480C   | 8.8 | 2 | 2140A  | 8.8 | 2 |
| 14979C | 8.8 | 2 | 549T   | 8.8 | 2 | 3213G  | 8.8 | 2 |
| 11447A | 8.8 | 2 | 16038G | 8.8 | 2 | 15836G | 8.8 | 2 |
| 14553T | 8.8 | 2 | 4254C  | 8.8 | 2 | 9725C  | 8.8 | 2 |
| 5892C  | 8.8 | 2 | 337G   | 8.8 | 2 | 9090C  | 8.8 | 2 |
| 7621C  | 8.8 | 2 | 9027T  | 8.8 | 2 | 9041G  | 8.8 | 2 |
| 7678C  | 8.8 | 2 | 58C    | 8.8 | 2 | 10499G | 8.8 | 2 |
| 262T   | 8.8 | 2 | 13188T | 8.8 | 2 | 319C   | 8.8 | 2 |
| 11989G | 8.8 | 2 | 8292A  | 8.8 | 2 | 1850C  | 8.8 | 2 |
| 14149T | 8.8 | 2 | 10652C | 8.8 | 2 | 430C   | 8.8 | 2 |
| 11044T | 8.8 | 2 | 5120G  | 8.8 | 2 | 11518A | 8.8 | 2 |
| 13662T | 8.8 | 2 | 60.1T  | 8.8 | 2 | 11386C | 8.8 | 2 |
| 9530C  | 8.8 | 2 | 12542T | 8.8 | 2 | 9103C  | 8.8 | 2 |
| 12633T | 8.8 | 2 | 9337C  | 8.8 | 2 | 13419G | 8.8 | 2 |
| 8756C  | 8.8 | 2 | 7471d  | 8.8 | 2 | 5915T  | 8.8 | 2 |

|         |     |   |         |     |   |        |     |   |
|---------|-----|---|---------|-----|---|--------|-----|---|
| 12672G  | 8.8 | 2 | 11215T  | 8.8 | 2 | 1041G  | 8.8 | 2 |
| 5493C   | 8.8 | 2 | 15565C  | 8.8 | 2 | 16175G | 8.8 | 2 |
| 2404C   | 8.8 | 2 | 9944C   | 8.8 | 2 | 9605T  | 8.8 | 2 |
| 8290A   | 8.8 | 2 | 6599G   | 8.8 | 2 | 7241G  | 8.8 | 2 |
| 14950T  | 8.8 | 2 | 1927A   | 8.8 | 2 | 4755C  | 8.8 | 2 |
| 16242A  | 8.8 | 2 | 4732G   | 8.8 | 2 | 8702T  | 8.8 | 2 |
| 7391C   | 8.8 | 2 | 15954G  | 8.8 | 2 | 4122G  | 8.8 | 2 |
| 5414G   | 8.8 | 2 | 15193G  | 8.8 | 2 | 6119T  | 8.8 | 2 |
| 12308G  | 8.8 | 2 | 5508C   | 8.8 | 2 | 3766C  | 8.8 | 2 |
| 7783C   | 8.8 | 2 | 3202C   | 8.8 | 2 | 10248C | 8.8 | 2 |
| 11266T  | 8.8 | 2 | 1734T   | 8.8 | 2 | 12400G | 8.8 | 2 |
| 384G    | 8.8 | 2 | 7738C   | 8.8 | 2 | 3843G  | 8.8 | 2 |
| 97A     | 8.8 | 2 | 13749T  | 8.8 | 2 | 5899d  | 8.8 | 2 |
| 3867T   | 8.8 | 2 | 15022T  | 8.8 | 2 | 13740C | 8.8 | 2 |
| 14500G  | 8.8 | 2 | 11326T  | 8.8 | 2 | 16152C | 8.8 | 2 |
| 15853T  | 8.8 | 2 | 14218C  | 8.8 | 2 | 10792G | 8.8 | 2 |
| 11812G  | 8.8 | 2 | 16291T! | 8.8 | 2 | 3927G  | 8.8 | 2 |
| 2141C   | 8.8 | 2 | 4811G   | 8.8 | 2 | 7376T  | 8.8 | 2 |
| 1420C   | 8.8 | 2 | 6570T   | 8.8 | 2 | 16270G | 8.8 | 2 |
| 55.1T   | 8.8 | 2 | 15418T  | 8.8 | 2 | 2220G  | 8.8 | 2 |
| 13743C  | 8.8 | 2 | 1009T   | 8.8 | 2 | 16131C | 8.8 | 2 |
| 15445C  | 8.8 | 2 | 10005G  | 8.8 | 2 | 14783C | 8.8 | 2 |
| 458T    | 8.8 | 2 | 5913A   | 8.8 | 2 | 3981G  | 8.8 | 2 |
| 1836G   | 8.8 | 2 | 14013G  | 8.8 | 2 | 11239G | 8.8 | 2 |
| 10490C  | 8.8 | 2 | 11038G  | 8.8 | 2 | 546G   | 8.8 | 2 |
| 15090C  | 8.8 | 2 | 281G    | 8.8 | 2 | 6836T  | 8.8 | 2 |
| 5811G   | 8.8 | 2 | 8603C   | 8.8 | 2 | 6614C  | 8.8 | 2 |
| 11800G  | 8.8 | 2 | 8278.XC | 8.8 | 2 | 11941G | 8.8 | 2 |
| 8775T   | 8.8 | 2 | 9452A   | 8.8 | 2 | 15391T | 8.8 | 2 |
| 9617G   | 8.8 | 2 | 5894C   | 8.8 | 2 | 3435T  | 8.8 | 2 |
| 15499T  | 8.8 | 2 | 16093C! | 8.8 | 2 | 5441G  | 8.8 | 2 |
| 15787C  | 8.8 | 2 | 5465C   | 8.8 | 2 | 14088C | 8.8 | 2 |
| 8230T   | 8.8 | 2 | 15746G  | 8.8 | 2 | 16266A | 8.8 | 2 |
| 5277C   | 8.8 | 2 | 6905G   | 8.8 | 2 | 14989T | 8.8 | 2 |
| 11818G  | 8.8 | 2 | 10364A  | 8.8 | 2 | 11149A | 8.8 | 2 |
| 10496G  | 8.8 | 2 | 16261T! | 8.8 | 2 | 5027T  | 8.8 | 2 |
| 14839G  | 8.8 | 2 | 16305G  | 8.8 | 2 | 15508T | 8.8 | 2 |
| 1977C   | 8.8 | 2 | 1185T   | 8.8 | 2 | 103A!  | 8.8 | 2 |
| 507C    | 8.8 | 2 | 11407T  | 8.8 | 2 | 14959G | 8.8 | 2 |
| 11467G  | 8.8 | 2 | 7058C   | 8.8 | 2 | 7771G  | 8.8 | 2 |
| 11778A  | 8.8 | 2 | 9977C   | 8.8 | 2 | 8467T  | 8.8 | 2 |
| 13980A  | 8.8 | 2 | 7271G   | 8.8 | 2 | 6116G  | 8.8 | 2 |
| 16266T! | 8.8 | 2 | 12237T  | 8.8 | 2 | 10807G | 8.8 | 2 |
| 11075C  | 8.8 | 2 | 15038G  | 8.8 | 2 | 13477A | 8.8 | 2 |
| 6305A   | 8.8 | 2 | 16194C  | 8.8 | 2 | 14410A | 8.8 | 2 |
| 8650T   | 8.8 | 2 | 16000A  | 8.8 | 2 | 9644G  | 8.8 | 2 |
| 13674C  | 8.8 | 2 | 16266G  | 8.8 | 2 | 9067G  | 8.8 | 2 |
| 1804G   | 8.8 | 2 | 5824A   | 8.8 | 2 | 9109G  | 8.8 | 2 |
| 11776C  | 8.8 | 2 | 13413G  | 8.8 | 2 | 7388G  | 8.8 | 2 |
| 3817T   | 8.8 | 2 | 5814C   | 8.8 | 2 | 15055C | 8.8 | 2 |
| 12246T  | 8.8 | 2 | 62A     | 8.8 | 2 | 9242G  | 8.8 | 2 |
| 11497T  | 8.8 | 2 | 6497C   | 8.8 | 2 | 10688A | 8.8 | 2 |
| 4017T   | 8.8 | 2 | 6473T   | 8.8 | 2 | 13161C | 8.8 | 2 |
| 13191C  | 8.8 | 2 | 10895G  | 8.8 | 2 | 4062C  | 8.8 | 2 |
| 16157C  | 8.8 | 2 | 551G    | 8.8 | 2 | 8988G  | 8.8 | 2 |
| 479G    | 8.8 | 2 | 3663G   | 8.8 | 2 | 9116C  | 8.8 | 2 |
| 7684C   | 8.8 | 2 | 5987T   | 8.8 | 2 | 212C   | 8.8 | 2 |
| 4086T   | 8.8 | 2 | 13221G  | 8.8 | 2 | 12711G | 8.8 | 2 |

|        |     |   |        |     |   |         |     |   |
|--------|-----|---|--------|-----|---|---------|-----|---|
| 14890G | 8.8 | 2 | 14926G | 8.8 | 2 | 9903C   | 8.8 | 2 |
| 13958C | 8.8 | 2 | 13789C | 8.8 | 2 | 12161C  | 8.8 | 2 |
| 15839T | 8.8 | 2 | 340T   | 8.8 | 2 | 8901G   | 8.8 | 2 |
| 128T   | 8.8 | 2 | 11732C | 8.8 | 2 | 16189A  | 8.8 | 2 |
| 3645C  | 8.8 | 2 | 3116T  | 8.8 | 2 | 15652G  | 8.8 | 2 |
| 15937G | 8.8 | 2 | 7109T  | 8.8 | 2 | 11491G  | 8.8 | 2 |
| 14696G | 8.8 | 2 | 7151T  | 8.8 | 2 | 6641C   | 8.8 | 2 |
| 10914A | 8.8 | 2 | 4132A  | 8.8 | 2 | 16172C! | 8.8 | 2 |
| 7419A  | 8.8 | 2 | 4736C  | 8.8 | 2 | 15547T  | 8.8 | 2 |
| 15970C | 8.8 | 2 | 309d   | 8.8 | 2 | 1342T   | 8.8 | 2 |
| 12235C | 8.8 | 2 | 6518T  | 8.8 | 2 | 4023C   | 8.8 | 2 |
| 14788C | 8.8 | 2 | 723C   | 8.8 | 2 | 6227C   | 8.8 | 2 |
| 13104G | 8.8 | 2 | 14620T | 8.8 | 2 | 8161T   | 8.8 | 2 |
| 663G   | 8.8 | 2 | 2246G  | 8.8 | 2 | 14299C  | 8.8 | 2 |
| 8395T  | 8.8 | 2 | 1978G  | 8.8 | 2 | 9851T   | 8.8 | 2 |
| 16214A | 8.8 | 2 | 12297C | 8.8 | 2 | 5096C   | 8.8 | 2 |
| 13617C | 8.8 | 2 | 11674T | 8.8 | 2 | 8562T   | 8.8 | 2 |
| 13802T | 8.8 | 2 | 8433C  | 8.8 | 2 | 15052G  | 8.8 | 2 |
| 5583T  | 8.8 | 2 | 6146G  | 8.8 | 2 | 10955T  | 8.8 | 2 |
| 6584T  | 8.8 | 2 | 3654T  | 8.8 | 2 | 4904T   | 8.8 | 2 |
| 3564G  | 8.8 | 2 | 5984G  | 8.8 | 2 | 8264T   | 8.8 | 2 |
| 8610C  | 8.8 | 2 | 6938T  | 8.8 | 2 | 9957C   | 8.8 | 2 |
| 11296T | 8.8 | 2 | 11350G | 8.8 | 2 | 4967C   | 8.8 | 2 |
| 11938T | 8.8 | 2 | 8137T  | 8.8 | 2 | 4735A   | 8.8 | 2 |
| 14893G | 8.8 | 2 | 8684T  | 8.8 | 2 | 13129T  | 8.8 | 2 |
| 10619T | 8.8 | 2 | 10142T | 8.8 | 2 | 4065G   | 8.8 | 2 |
| 3768G  | 8.8 | 2 | 9852G  | 8.8 | 2 | 15884C  | 8.8 | 2 |
| 15097C | 8.8 | 2 | 282C   | 8.8 | 2 | 12669T  | 8.8 | 2 |
| 10927C | 8.8 | 2 | 6455T  | 8.8 | 2 | 10086G  | 8.8 | 2 |
| 4059T  | 8.8 | 2 | 9365T  | 8.8 | 2 | 9278T   | 8.8 | 2 |
| 10907C | 8.8 | 2 | 10733T | 8.8 | 2 | 16082T  | 8.8 | 2 |
| 1047G  | 8.8 | 2 | 12768G | 8.8 | 2 | 10097G  | 8.8 | 2 |
| 8413G  | 8.8 | 2 | 1811G! | 8.8 | 2 | 8658T   | 8.8 | 2 |
| 5788C  | 8.8 | 2 | 5165T  | 8.8 | 2 | 9211T   | 8.8 | 2 |
| 16074G | 8.8 | 2 | 3696T  | 8.8 | 2 | 3357A   | 8.8 | 2 |
| 16336A | 8.8 | 2 | 11582G | 8.8 | 2 | 14634C  | 8.8 | 2 |
| 2757G  | 8.8 | 2 | 14530C | 8.8 | 2 | 5048C   | 8.8 | 2 |
| 4209C  | 8.8 | 2 | 5177A  | 8.8 | 2 | 5553C   | 8.8 | 2 |
| 6674C  | 8.8 | 2 | 6260A! | 8.8 | 2 | 11617C  | 8.8 | 2 |
| 11329G | 8.8 | 2 | 15880G | 8.8 | 2 | 10370C  | 8.8 | 2 |
| 4843T  | 8.8 | 2 | 16246T | 8.8 | 2 | 12906T  | 8.8 | 2 |
| 3861G  | 8.8 | 2 | 942G   | 8.8 | 2 | 16250T  | 8.8 | 2 |
| 9670G  | 8.8 | 2 | 7118G  | 8.8 | 2 | 453A    | 8.8 | 2 |
| 7226A  | 8.8 | 2 | 8531G  | 8.8 | 2 | 15080G  | 8.8 | 2 |
| 6461G  | 8.8 | 2 | 9428C  | 8.8 | 2 | 11368C  | 8.8 | 2 |
| 960d   | 8.8 | 2 | 8870C  | 8.8 | 2 | 9410G   | 8.8 | 2 |
| 15383C | 8.8 | 2 | 6367C  | 8.8 | 2 | 2010C   | 8.8 | 2 |
| 9100G  | 8.8 | 2 | 16T    | 8.8 | 2 | 14311C  | 8.8 | 2 |
| 13569C | 8.8 | 2 | 15791G | 8.8 | 2 | 8928C   | 8.8 | 2 |
| 8557C  | 8.8 | 2 | 15650A | 8.8 | 2 | 16232T  | 8.8 | 2 |
| 13440T | 8.8 | 2 | 11878C | 8.8 | 2 | 8867C   | 8.8 | 2 |
| 11734G | 8.8 | 2 | 4158G  | 8.8 | 2 | 178G    | 8.8 | 2 |
| 15632T | 8.8 | 2 | 9287A  | 8.8 | 2 | 14384C  | 8.8 | 2 |
| 12950C | 8.8 | 2 | 3702G  | 8.8 | 2 | 9512T   | 8.8 | 2 |
| 12603T | 8.8 | 2 | 15381T | 8.8 | 2 | 12025T  | 8.8 | 2 |
| 11947G | 8.8 | 2 | 6053T  | 8.8 | 2 | 9713A   | 8.8 | 2 |
| 4970G  | 8.8 | 2 | 12019T | 8.8 | 2 | 9650T   | 8.8 | 2 |
| 9094T  | 8.8 | 2 | 12188C | 8.8 | 2 | 14911T  | 8.8 | 2 |

|        |     |   |        |     |   |         |     |   |
|--------|-----|---|--------|-----|---|---------|-----|---|
| 676A   | 8.8 | 2 | 494T   | 8.8 | 2 | 1120T   | 8.8 | 2 |
| 13855T | 8.8 | 2 | 9941G  | 8.8 | 2 | 4586C   | 8.8 | 2 |
| 14280G | 8.8 | 2 | 7129G  | 8.8 | 2 | 9063G   | 8.8 | 2 |
| 11548G | 8.8 | 2 | 13926C | 8.8 | 2 | 7948T   | 8.8 | 2 |
| 9344T  | 8.8 | 2 | 189C   | 8.8 | 2 | 8108G   | 8.8 | 2 |
| 11248G | 8.8 | 2 | 294C   | 8.8 | 2 | 16234T! | 8.8 | 2 |
| 1738C  | 8.8 | 2 | 990C   | 8.8 | 2 | 4833G   | 8.8 | 2 |
| 14791T | 8.8 | 2 | 12469G | 8.8 | 2 | 7867T   | 8.8 | 2 |
| 15229C | 8.8 | 2 | 16359C | 8.8 | 2 | 8566G   | 8.8 | 2 |
| 5910A  | 8.8 | 2 | 8521G  | 8.8 | 2 | 4833G!  | 8.8 | 2 |
| 6794G  | 8.8 | 2 | 13152G | 8.8 | 2 | 8748T   | 8.8 | 2 |
| 11482C | 8.8 | 2 | 9845C  | 8.8 | 2 | 13383T  | 8.8 | 2 |
| 92A    | 8.8 | 2 | 954T   | 8.8 | 2 | 5782C   | 8.8 | 2 |
| 14211T | 8.8 | 2 | 14356T | 8.8 | 2 | 8877C   | 8.8 | 2 |
| 8654C  | 8.8 | 2 | 2045G  | 8.8 | 2 | 191.1A  | 8.8 | 2 |
| 808T   | 8.8 | 2 | 14315T | 8.8 | 2 | 7660C   | 8.8 | 2 |
| 105d   | 8.8 | 2 | 14527G | 8.8 | 2 | 11506C  | 8.8 | 2 |
| 6602T  | 8.8 | 2 | 3999C  | 8.8 | 2 | 4394T   | 8.8 | 2 |
| 8459G  | 8.8 | 2 | 14417G | 8.8 | 2 | 527T    | 8.8 | 2 |
| 8393T  | 8.8 | 2 | 1780C  | 8.8 | 2 | 2080C   | 8.8 | 2 |
| 15874G | 8.8 | 2 | 13254C | 8.8 | 2 | 6231T   | 8.8 | 2 |
| 12880C | 8.8 | 2 | 1677T  | 8.8 | 2 | 15025T  | 8.8 | 2 |
| 12909G | 8.8 | 2 | 15777C | 8.8 | 2 | 3453T   | 8.8 | 2 |
| 7694T  | 8.8 | 2 | 644G   | 8.8 | 2 | 13812C  | 8.8 | 2 |
| 15300C | 8.8 | 2 | 195A   | 8.8 | 2 | 870T    | 8.8 | 2 |
| 15852C | 8.8 | 2 | 11963A | 8.8 | 2 | 15263T  | 8.8 | 2 |
| 6167C  | 8.8 | 2 | 9374G  | 8.8 | 2 | 4212G   | 8.8 | 2 |
| 66A    | 8.8 | 2 | 8886A  | 8.8 | 2 | 1053G   | 8.8 | 2 |
| 15664T | 8.8 | 2 | 15896G | 8.8 | 2 | 13803G  | 8.8 | 2 |
| 5090C  | 8.8 | 2 | 8110C  | 8.8 | 2 | 13065T  | 8.8 | 2 |
| 7498A  | 8.8 | 2 | 4958G  | 8.8 | 2 | 5843G   | 8.8 | 2 |
| 1375T  | 8.8 | 2 | 3756G  | 8.8 | 2 | 16241G! | 8.8 | 2 |
| 10188G | 8.8 | 2 | 7175C  | 8.8 | 2 | 16488T  | 8.8 | 2 |
| 7533T  | 8.8 | 2 | 3140G  | 8.8 | 2 | 7816T   | 8.8 | 2 |
| 8140T  | 8.8 | 2 | 12804C | 8.8 | 2 | 228T    | 8.8 | 2 |
| 794C   | 8.8 | 2 | 9797C  | 8.8 | 2 | 5075C   | 8.8 | 2 |
| 226C   | 8.8 | 2 | 12049T | 8.8 | 2 | 2768G   | 8.8 | 2 |
| 5375T  | 8.8 | 2 | 16471A | 8.8 | 2 | 61T     | 8.8 | 2 |
| 9151G  | 8.8 | 2 | 12375C | 8.8 | 2 | 14407T  | 8.8 | 2 |
| 8406T  | 8.8 | 2 | 291d   | 8.8 | 2 | 12189C  | 8.8 | 2 |
| 5111T  | 8.8 | 2 | 4167T  | 8.8 | 2 | 8668C   | 8.8 | 2 |
| 14566G | 8.8 | 2 | 8848C  | 8.8 | 2 | 16178C  | 8.8 | 2 |
| 13887G | 8.8 | 2 | 12978G | 8.8 | 2 | 6917A   | 8.8 | 2 |
| 2332T  | 8.8 | 2 | 7697A  | 8.8 | 2 | 8925G   | 8.8 | 2 |
| 15550T | 8.8 | 2 | 194T!  | 8.8 | 2 | 16225T  | 8.8 | 2 |
| 5601T  | 8.8 | 2 | 10834T | 8.8 | 2 | 3592A   | 8.8 | 2 |
| 745.1T | 8.8 | 2 | 16150T | 8.8 | 2 | 3894T   | 8.8 | 2 |
| 7394G  | 8.8 | 2 | 8014G  | 8.8 | 2 | 553T    | 8.8 | 2 |
| 13884G | 8.8 | 2 | 5036G  | 8.8 | 2 | 3546T   | 8.8 | 2 |
| 200G!  | 8.8 | 2 | 9248T  | 8.8 | 2 | 13149G  | 8.8 | 2 |
| 8703T  | 8.8 | 2 | 11254C | 8.8 | 2 | 15644G  | 8.8 | 2 |
| 4395G  | 8.8 | 2 | 12780G | 8.8 | 2 | 5655C   | 8.8 | 2 |
| 12215C | 8.8 | 2 | 11902A | 8.8 | 2 | 7353G   | 8.8 | 2 |
| 3852T  | 8.8 | 2 | 2780T  | 8.8 | 2 | 15805G  | 8.8 | 2 |
| 10335C | 8.8 | 2 | 9115G  | 8.8 | 2 | 8116G   | 8.8 | 2 |
| 9490T  | 8.8 | 2 | 8631G  | 8.8 | 2 | 2885C   | 8.8 | 2 |
| 13317A | 8.8 | 2 | 12362T | 8.8 | 2 | 3349G   | 8.8 | 2 |
| 11260C | 8.8 | 2 | 16158G | 8.8 | 2 | 6285A   | 8.8 | 2 |

|         |     |   |          |    |   |        |    |   |
|---------|-----|---|----------|----|---|--------|----|---|
| 15889C  | 8.8 | 2 | 2145A    | 10 | 1 | 16276C | 10 | 1 |
| 297G    | 8.8 | 2 | 16080G   | 10 | 1 | 13035T | 10 | 1 |
| 280T    | 8.8 | 2 | 7691C    | 10 | 1 | 8245G  | 10 | 1 |
| 6176C   | 8.8 | 2 | 11029G   | 10 | 1 | 267C   | 10 | 1 |
| 9042T   | 8.8 | 2 | 9066G    | 10 | 1 | 6446T  | 10 | 1 |
| 14755G  | 8.8 | 2 | 7309C    | 10 | 1 | 10003C | 10 | 1 |
| 11059T  | 8.8 | 2 | 8602C    | 10 | 1 | 10348C | 10 | 1 |
| 13819C  | 8.8 | 2 | 5206T    | 10 | 1 | 8740T  | 10 | 1 |
| 8434T   | 8.8 | 2 | 477C     | 10 | 1 | 4316G  | 10 | 1 |
| 10427A  | 8.8 | 2 | 1926G    | 10 | 1 | 6515G  | 10 | 1 |
| 1310T   | 8.8 | 2 | 12858T   | 10 | 1 | 16239G | 10 | 1 |
| 4092A   | 8.8 | 2 | 15315T   | 10 | 1 | 14125T | 10 | 1 |
| 13984T  | 8.8 | 2 | 6074T    | 10 | 1 | 10754C | 10 | 1 |
| 4964T   | 8.8 | 2 | 8803G    | 10 | 1 | 15377G | 10 | 1 |
| 2789T   | 8.8 | 2 | 14350T   | 10 | 1 | 13611G | 10 | 1 |
| 731G    | 8.8 | 2 | 14182A   | 10 | 1 | 5893T  | 10 | 1 |
| 5196C   | 8.8 | 2 | 8417A    | 10 | 1 | 12217G | 10 | 1 |
| 143A!   | 8.8 | 2 | 4484T    | 10 | 1 | 2581G  | 10 | 1 |
| 719A    | 8.8 | 2 | 12627G   | 10 | 1 | 1290T  | 10 | 1 |
| 9018C   | 8.8 | 2 | 12310.1A | 10 | 1 | 3832A  | 10 | 1 |
| 264T    | 8.8 | 2 | 15325C   | 10 | 1 | 6638C  | 10 | 1 |
| 14812T  | 8.8 | 2 | 5387T    | 10 | 1 | 12447G | 10 | 1 |
| 7298G   | 8.8 | 2 | 14491T   | 10 | 1 | 1536G  | 10 | 1 |
| 9072G   | 8.8 | 2 | 11113C   | 10 | 1 | 5896T  | 10 | 1 |
| 16293G! | 8.8 | 2 | 11371G   | 10 | 1 | 1618G  | 10 | 1 |
| 16360T! | 8.8 | 2 | 1900C    | 10 | 1 | 15592G | 10 | 1 |
| 11854C  | 8.8 | 2 | 2320G    | 10 | 1 | 5960T  | 10 | 1 |
| 14007G  | 8.8 | 2 | 12915A   | 10 | 1 | 13713T | 10 | 1 |
| 4012G   | 8.8 | 2 | 4781G    | 10 | 1 | 14501G | 10 | 1 |
| 12720G! | 8.8 | 2 | 453C     | 10 | 1 | 6953G  | 10 | 1 |
| 11974G  | 8.8 | 2 | 1812T    | 10 | 1 | 8939C  | 10 | 1 |
| 16390T  | 8.8 | 2 | 4673G    | 10 | 1 | 3613T  | 10 | 1 |
| 8182T   | 10  | 1 | 15817G   | 10 | 1 | 4512A  | 10 | 1 |
| 8860G   | 10  | 1 | 10922G   | 10 | 1 | 293C   | 10 | 1 |
| 15326G  | 10  | 1 | 6237A    | 10 | 1 | 4315G  | 10 | 1 |
| 8634C   | 10  | 1 | 11144T   | 10 | 1 | 15917T | 10 | 1 |
| 750G    | 10  | 1 | 11963C   | 10 | 1 | 10247G | 10 | 1 |
| 13095C  | 10  | 1 | 1821G    | 10 | 1 | 9693T  | 10 | 1 |
| 979T    | 10  | 1 | 9290A    | 10 | 1 | 251A   | 10 | 1 |
| 3567T   | 10  | 1 | 3084G    | 10 | 1 | 15224T | 10 | 1 |
| 13272T  | 10  | 1 | 2222G    | 10 | 1 | 9525A  | 10 | 1 |
| 9862A   | 10  | 1 | 4171T    | 10 | 1 | 14582G | 10 | 1 |
| 11077G  | 10  | 1 | 2098A    | 10 | 1 | 14365T | 10 | 1 |
| 14494C  | 10  | 1 | 15742A   | 10 | 1 | 1656G  | 10 | 1 |
| 2195G   | 10  | 1 | 552A     | 10 | 1 | 6951A  | 10 | 1 |
| 751G    | 10  | 1 | 11551G   | 10 | 1 | 8380C  | 10 | 1 |
| 14189G  | 10  | 1 | 14224G   | 10 | 1 | 16179A | 10 | 1 |
| 2749G   | 10  | 1 | 9923T    | 10 | 1 | 3624G  | 10 | 1 |
| 11086G  | 10  | 1 | 8966C    | 10 | 1 | 9276A  | 10 | 1 |
| 205A    | 10  | 1 | 3411G    | 10 | 1 | 4095T  | 10 | 1 |
| 3334G   | 10  | 1 | 15088T   | 10 | 1 | 8803T  | 10 | 1 |
| 1438G   | 10  | 1 | 9621A    | 10 | 1 | 1284C  | 10 | 1 |
| 6365C   | 10  | 1 | 4763A    | 10 | 1 | 7517G  | 10 | 1 |
| 8271T   | 10  | 1 | 5309G    | 10 | 1 | 9392T  | 10 | 1 |
| 9341T   | 10  | 1 | 5780A    | 10 | 1 | 11221G | 10 | 1 |
| 8334A   | 10  | 1 | 15304A   | 10 | 1 | 15638T | 10 | 1 |
| 10455G  | 10  | 1 | 11890G   | 10 | 1 | 5839T  | 10 | 1 |
| 11962G  | 10  | 1 | 11515A   | 10 | 1 | 3310T  | 10 | 1 |

|        |    |   |         |    |   |         |    |   |
|--------|----|---|---------|----|---|---------|----|---|
| 9515T  | 10 | 1 | 3381G   | 10 | 1 | 13147T  | 10 | 1 |
| 7025G  | 10 | 1 | 8888C   | 10 | 1 | 5174T   | 10 | 1 |
| 5450T  | 10 | 1 | 14872T  | 10 | 1 | 8347G   | 10 | 1 |
| 14497G | 10 | 1 | 2259T   | 10 | 1 | 4221A   | 10 | 1 |
| 6923G  | 10 | 1 | 4745G   | 10 | 1 | 7002T   | 10 | 1 |
| 8011G  | 10 | 1 | 2701A   | 10 | 1 | 9677T   | 10 | 1 |
| 14311G | 10 | 1 | 8381G   | 10 | 1 | 12063T  | 10 | 1 |
| 15157G | 10 | 1 | 4231G   | 10 | 1 | 8068T   | 10 | 1 |
| 7474G  | 10 | 1 | 7903G   | 10 | 1 | 5435T   | 10 | 1 |
| 15082T | 10 | 1 | 1008G   | 10 | 1 | 9497C   | 10 | 1 |
| 8975C  | 10 | 1 | 13762G  | 10 | 1 | 11069G  | 10 | 1 |
| 13725T | 10 | 1 | 13575T  | 10 | 1 | 10403G  | 10 | 1 |
| 8593G  | 10 | 1 | 15713G  | 10 | 1 | 3798T   | 10 | 1 |
| 3525A  | 10 | 1 | 14863T  | 10 | 1 | 2706G   | 10 | 1 |
| 8578T  | 10 | 1 | 2713T   | 10 | 1 | 7028T   | 10 | 1 |
| 13056T | 10 | 1 | 5568G   | 10 | 1 | 15904T  | 10 | 1 |
| 16070G | 10 | 1 | 10217G  | 10 | 1 | 10196T  | 10 | 1 |
| 4727G  | 10 | 1 | 3906C   | 10 | 1 | 16346C  | 10 | 1 |
| 9362G  | 10 | 1 | 7610T   | 10 | 1 | 9088C   | 10 | 1 |
| 9773T  | 10 | 1 | 9689G   | 10 | 1 | 15773A  | 10 | 1 |
| 11662C | 10 | 1 | 12834G  | 10 | 1 | 4550C   | 10 | 1 |
| 5785C  | 10 | 1 | 15715G  | 10 | 1 | 14550C  | 10 | 1 |
| 10936T | 10 | 1 | 8699C   | 10 | 1 | 3549T   | 10 | 1 |
| 288G   | 10 | 1 | 10394T  | 10 | 1 | 11581T  | 10 | 1 |
| 6218G  | 10 | 1 | 15340G  | 10 | 1 | 9368G   | 10 | 1 |
| 12975G | 10 | 1 | 9071T   | 10 | 1 | 9098G   | 10 | 1 |
| 13869C | 10 | 1 | 14155T  | 10 | 1 | 4221T   | 10 | 1 |
| 6869T  | 10 | 1 | 9129T   | 10 | 1 | 10308T  | 10 | 1 |
| 12351C | 10 | 1 | 14249A  | 10 | 1 | 1537T   | 10 | 1 |
| 13323T | 10 | 1 | 6296T   | 10 | 1 | 14914C  | 10 | 1 |
| 6296A  | 10 | 1 | 8895A   | 10 | 1 | 3573T   | 10 | 1 |
| 13959T | 10 | 1 | 9391T   | 10 | 1 | 8014T   | 10 | 1 |
| 15409T | 10 | 1 | 4838C   | 10 | 1 | 14443T  | 10 | 1 |
| 14871C | 10 | 1 | 380A    | 10 | 1 | 14161G  | 10 | 1 |
| 14405G | 10 | 1 | 85A     | 10 | 1 | 7372C   | 10 | 1 |
| 8639G  | 10 | 1 | 16328A  | 10 | 1 | 7193C   | 10 | 1 |
| 8026T  | 10 | 1 | 292C    | 10 | 1 | 12061T  | 10 | 1 |
| 9527T  | 10 | 1 | 9756G   | 10 | 1 | 13866G  | 10 | 1 |
| 7472T  | 10 | 1 | 7334C   | 10 | 1 | 7094C   | 10 | 1 |
| 3984T  | 10 | 1 | 3822T   | 10 | 1 | 16221T! | 10 | 1 |
| 9114G  | 10 | 1 | 3333T   | 10 | 1 | 10356T  | 10 | 1 |
| 7930T  | 10 | 1 | 10562G  | 10 | 1 | 16113C  | 10 | 1 |
| 10771G | 10 | 1 | 2239G   | 10 | 1 | 13449T  | 10 | 1 |
| 15247T | 10 | 1 | 13635A  | 10 | 1 | 9000G   | 10 | 1 |
| 8448C  | 10 | 1 | 6323G   | 10 | 1 | 12492T  | 10 | 1 |
| 961G   | 10 | 1 | 3342T   | 10 | 1 | 4997T   | 10 | 1 |
| 8898T  | 10 | 1 | 13362T  | 10 | 1 | 1601T   | 10 | 1 |
| 9521T  | 10 | 1 | 5752.1A | 10 | 1 | 3892G   | 10 | 1 |
| 9911T  | 10 | 1 | 11458G  | 10 | 1 | 15682G  | 10 | 1 |
| 3936T  | 10 | 1 | 13020A  | 10 | 1 | 594T    | 10 | 1 |
| 14552G | 10 | 1 | 15058T  | 10 | 1 | 8774G   | 10 | 1 |
| 3808G  | 10 | 1 | 10704A  | 10 | 1 | 14766T  | 10 | 1 |
| 6743C  | 10 | 1 | 3387C   | 10 | 1 | 11761T  | 10 | 1 |
| 4243G  | 10 | 1 | 4709T   | 10 | 1 | 2069C   | 10 | 1 |
| 14470A | 10 | 1 | 12674G  | 10 | 1 | 13479T  | 10 | 1 |
| 14548G | 10 | 1 | 6971C   | 10 | 1 | 5333C   | 10 | 1 |
| 9091G  | 10 | 1 | 3509C   | 10 | 1 | 26T     | 10 | 1 |
| 14602G | 10 | 1 | 14193G  | 10 | 1 | 15674C  | 10 | 1 |

|        |    |   |        |    |   |         |    |   |
|--------|----|---|--------|----|---|---------|----|---|
| 2355G  | 10 | 1 | 12020T | 10 | 1 | 9872G   | 10 | 1 |
| 7249T  | 10 | 1 | 12379T | 10 | 1 | 6830A   | 10 | 1 |
| 16305T | 10 | 1 | 15199T | 10 | 1 | 13612T  | 10 | 1 |
| 10728T | 10 | 1 | 15936T | 10 | 1 | 14029G  | 10 | 1 |
| 4106T  | 10 | 1 | 8923G  | 10 | 1 | 12633A  | 10 | 1 |
| 10493G | 10 | 1 | 8558T  | 10 | 1 | 12028C  | 10 | 1 |
| 7837C  | 10 | 1 | 15947G | 10 | 1 | 15965G  | 10 | 1 |
| 12295C | 10 | 1 | 9836C  | 10 | 1 | 13132T  | 10 | 1 |
| 2179G  | 10 | 1 | 8847T  | 10 | 1 | 4155T   | 10 | 1 |
| 14392T | 10 | 1 | 10227C | 10 | 1 | 15213C  | 10 | 1 |
| 12474T | 10 | 1 | 14296G | 10 | 1 | 16269C  | 10 | 1 |
| 2351C  | 10 | 1 | 12083G | 10 | 1 | 3308G   | 10 | 1 |
| 5205C  | 10 | 1 | 5198G  | 10 | 1 | 8530G   | 10 | 1 |
| 10775A | 10 | 1 | 10334T | 10 | 1 | 469T    | 10 | 1 |
| 15628G | 10 | 1 | 8734A  | 10 | 1 | 8974T   | 10 | 1 |
| 3360G  | 10 | 1 | 3721G  | 10 | 1 | 4917G!  | 10 | 1 |
| 5586T  | 10 | 1 | 15916C | 10 | 1 | 14274G  | 10 | 1 |
| 6557T  | 10 | 1 | 2969G  | 10 | 1 | 15607G! | 10 | 1 |
| 7547C  | 10 | 1 | 15913T | 10 | 1 | 7258C   | 10 | 1 |
| 10825G | 10 | 1 | 6554T  | 10 | 1 | 7001G   | 10 | 1 |
| 13948T | 10 | 1 | 6464A  | 10 | 1 | 91T     | 10 | 1 |
| 14632T | 10 | 1 | 4084A  | 10 | 1 | 8412C   | 10 | 1 |
| 4026G  | 10 | 1 | 13581C | 10 | 1 | 13791T  | 10 | 1 |
| 8765T  | 10 | 1 | 9219G  | 10 | 1 | 10376G  | 10 | 1 |
| 11977T | 10 | 1 | 11503T | 10 | 1 | 512G    | 10 | 1 |
| 12245C | 10 | 1 | 8940T  | 10 | 1 | 2850C   | 10 | 1 |
| 6683T  | 10 | 1 | 6887T  | 10 | 1 | 7022C   | 10 | 1 |
| 11122A | 10 | 1 | 5024T  | 10 | 1 | 4808T   | 10 | 1 |
| 14062G | 10 | 1 | 12453C | 10 | 1 | 7268C   | 10 | 1 |
| 14185G | 10 | 1 | 15113G | 10 | 1 | 4931T   | 10 | 1 |
| 11251G | 10 | 1 | 7963G  | 10 | 1 | 3350C   | 10 | 1 |
| 15452A | 10 | 1 | 8633G  | 10 | 1 | 8256C   | 10 | 1 |
| 295T   | 10 | 1 | 5297T  | 10 | 1 | 4464A   | 10 | 1 |
| 5463T  | 10 | 1 | 15894A | 10 | 1 | 11242G  | 10 | 1 |
| 6911C  | 10 | 1 | 7476T  | 10 | 1 | 59C     | 10 | 1 |
| 10C    | 10 | 1 | 310.1T | 10 | 1 | 7150C   | 10 | 1 |
| 6345C  | 10 | 1 | 7501C  | 10 | 1 | 5527G   | 10 | 1 |
| 7747T  | 10 | 1 | 6635C  | 10 | 1 | 8711G   | 10 | 1 |
| 10942G | 10 | 1 | 11857T | 10 | 1 | 8504C   | 10 | 1 |
| 1733T  | 10 | 1 | 12570G | 10 | 1 | 11533T  | 10 | 1 |
| 15172T | 10 | 1 | 15679G | 10 | 1 | 16257d  | 10 | 1 |
| 15490T | 10 | 1 | 8386T  | 10 | 1 | 10559G  | 10 | 1 |
| 4013T  | 10 | 1 | 11797G | 10 | 1 | 634C    | 10 | 1 |
| 9324G  | 10 | 1 | 14061T | 10 | 1 | 13692T  | 10 | 1 |
| 14455T | 10 | 1 | 4802C  | 10 | 1 | 14836G  | 10 | 1 |
| 6045A  | 10 | 1 | 8078A  | 10 | 1 | 3820T   | 10 | 1 |
| 5501G  | 10 | 1 | 11416T | 10 | 1 | 12223G  | 10 | 1 |
| 203C   | 10 | 1 | 8958T  | 10 | 1 | 9224C   | 10 | 1 |
| 266C   | 10 | 1 | 5633T  | 10 | 1 | 321C    | 10 | 1 |
| 10601A | 10 | 1 | 6893T  | 10 | 1 | 8934T   | 10 | 1 |
| 9635C  | 10 | 1 | 7302C  | 10 | 1 | 1871G   | 10 | 1 |
| 7184G  | 10 | 1 | 15014C | 10 | 1 | 1530G   | 10 | 1 |
| 15725T | 10 | 1 | 6491T  | 10 | 1 | 9843G   | 10 | 1 |
| 11227T | 10 | 1 | 9016G  | 10 | 1 | 10822T  | 10 | 1 |
| 7245G  | 10 | 1 | 6962T  | 10 | 1 | 8455T   | 10 | 1 |
| 6915A  | 10 | 1 | 10389C | 10 | 1 | 13973T  | 10 | 1 |
| 16370A | 10 | 1 | 7211A  | 10 | 1 | 6998T   | 10 | 1 |
| 16261A | 10 | 1 | 15453C | 10 | 1 | 5817T   | 10 | 1 |



|         |    |   |         |    |   |         |    |   |
|---------|----|---|---------|----|---|---------|----|---|
| 5187T   | 10 | 1 | 548T    | 10 | 1 | 7740G   | 10 | 1 |
| 7873T   | 10 | 1 | 6098G   | 10 | 1 | 8338G   | 10 | 1 |
| 12363T  | 10 | 1 | 5985A   | 10 | 1 | 16289T  | 10 | 1 |
| 7679C   | 10 | 1 | 13748G  | 10 | 1 | 70A     | 10 | 1 |
| 6445T   | 10 | 1 | 15452T  | 10 | 1 | 11203T  | 10 | 1 |
| 41T!    | 10 | 1 | 53A     | 10 | 1 | 13416G  | 10 | 1 |
| 8864C   | 10 | 1 | 54C     | 10 | 1 | 3909T   | 10 | 1 |
| 10682T  | 10 | 1 | 13044T  | 10 | 1 | 7346G   | 10 | 1 |
| 9139A   | 10 | 1 | 10976T  | 10 | 1 | 13908T  | 10 | 1 |
| 6489A   | 10 | 1 | 16232A  | 10 | 1 | 14449G  | 10 | 1 |
| 15028A  | 10 | 1 | 5049T   | 10 | 1 | 8525G   | 10 | 1 |
| 7984A   | 10 | 1 | 4705C   | 10 | 1 | 6492T   | 10 | 1 |
| 8854A   | 10 | 1 | 14103A  | 10 | 1 | 16268T  | 10 | 1 |
| 751T    | 10 | 1 | 10235C  | 10 | 1 | 15292T  | 10 | 1 |
| 5322C   | 10 | 1 | 12633T! | 10 | 1 | 73C     | 10 | 1 |
| 1766C   | 10 | 1 | 1709T   | 10 | 1 | 7052G   | 10 | 1 |
| 9234G   | 10 | 1 | 10045C  | 10 | 1 | 9822A   | 10 | 1 |
| 8041G   | 10 | 1 | 5628C   | 10 | 1 | 11632T  | 10 | 1 |
| 9422C   | 10 | 1 | 15402T  | 10 | 1 | 3960T   | 10 | 1 |
| 11812G! | 10 | 1 | 5587C   | 10 | 1 | 7927T   | 10 | 1 |
| 8271G   | 10 | 1 | 15024A  | 10 | 1 | 9812T   | 10 | 1 |
| 10446G  | 10 | 1 | 15496G  | 10 | 1 | 9069G   | 10 | 1 |
| 11062T  | 10 | 1 | 2389T   | 10 | 1 | 15632A  | 10 | 1 |
| 1829G   | 10 | 1 | 3621C   | 10 | 1 | 15983C  | 10 | 1 |
| 13956G  | 10 | 1 | 1824C   | 10 | 1 | 193G    | 10 | 1 |
| 15509G  | 10 | 1 | 16092A  | 10 | 1 | 14751T  | 10 | 1 |
| 8594C   | 10 | 1 | 747G    | 10 | 1 | 9968T   | 10 | 1 |
| 8987C   | 10 | 1 | 6156T   | 10 | 1 | 13547T  | 10 | 1 |
| 11293G  | 10 | 1 | 2281G   | 10 | 1 | 2378T   | 10 | 1 |
| 15385T  | 10 | 1 | 13782A  | 10 | 1 | 6482T   | 10 | 1 |
| 597.1T  | 10 | 1 | 9612C   | 10 | 1 | 16217C! | 10 | 1 |
| 14990T  | 10 | 1 | 275A    | 10 | 1 | 6302G   | 10 | 1 |
| 11409T  | 10 | 1 | 11323T  | 10 | 1 | 15535T  | 10 | 1 |
| 12285C  | 10 | 1 | 10320A  | 10 | 1 | 16483A  | 10 | 1 |
| 14058T  | 10 | 1 | 12621T  | 10 | 1 | 12729G  | 10 | 1 |
| 9051G   | 10 | 1 | 5076T   | 10 | 1 | 12890T  | 10 | 1 |
| 2282T   | 10 | 1 | 11065G! | 10 | 1 | 9097G   | 10 | 1 |
| 14064T  | 10 | 1 | 16265G! | 10 | 1 | 4226C   | 10 | 1 |
| 6254G   | 10 | 1 | 8337C   | 10 | 1 | 209C    | 10 | 1 |
| 3384G   | 10 | 1 | 317A    | 10 | 1 | 11968G  | 10 | 1 |
| 7759C   | 10 | 1 | 7561C   | 10 | 1 | 8641G   | 10 | 1 |
| 5510G   | 10 | 1 | 6653T   | 10 | 1 | 15521A  | 10 | 1 |
| 13782T  | 10 | 1 | 8575T   | 10 | 1 | 7262G   | 10 | 1 |
| 8646T   | 10 | 1 | 10097C  | 10 | 1 | 14757C  | 10 | 1 |
| 243G    | 10 | 1 | 356.1C  | 10 | 1 | 13661G  | 10 | 1 |
| 12462A  | 10 | 1 | 12239T  | 10 | 1 | 4123G   | 10 | 1 |
| 4205C   | 10 | 1 | 14022G  | 10 | 1 | 8875C   | 10 | 1 |
| 14041T  | 10 | 1 | 16247G  | 10 | 1 | 14049T  | 10 | 1 |
| 6485G   | 10 | 1 | 13479G  | 10 | 1 | 13833G  | 10 | 1 |
| 154C    | 10 | 1 | 10931C  | 10 | 1 | 114G    | 10 | 1 |
| 456.1T  | 10 | 1 | 14540C  | 10 | 1 | 1002T   | 10 | 1 |
| 1541C   | 10 | 1 | 13943T  | 10 | 1 | 11821G  | 10 | 1 |
| 10736T  | 10 | 1 | 16182T  | 10 | 1 | 470G    | 10 | 1 |
| 2322A   | 10 | 1 | 7534T   | 10 | 1 | 4259T   | 10 | 1 |
| 8724G   | 10 | 1 | 9734G   | 10 | 1 | 5270T   | 10 | 1 |
| 11422T  | 10 | 1 | 1473T   | 10 | 1 | 16361A  | 10 | 1 |
| 11308T  | 10 | 1 | 3423A   | 10 | 1 | 4371C   | 10 | 1 |
| 14227T  | 10 | 1 | 6581G   | 10 | 1 | 16422C  | 10 | 1 |

|        |    |   |         |    |   |         |    |   |
|--------|----|---|---------|----|---|---------|----|---|
| 16519A | 10 | 1 | 7542G   | 10 | 1 | 1309G   | 10 | 1 |
| 4191G  | 10 | 1 | 15758G! | 10 | 1 | 2763C   | 10 | 1 |
| 16467T | 10 | 1 | 481T    | 10 | 1 | 5503C   | 10 | 1 |
| 8146G  | 10 | 1 | 4161T   | 10 | 1 | 7046G   | 10 | 1 |
| 16323C | 10 | 1 | 131C!   | 10 | 1 | 8400C   | 10 | 1 |
| 202G   | 10 | 1 | 12451G  | 10 | 1 | 8464T   | 10 | 1 |
| 13599T | 10 | 1 | 10103G  | 10 | 1 | 8743A   | 10 | 1 |
| 14004T | 10 | 1 | 7170T   | 10 | 1 | 6077T   | 10 | 1 |
| 3648T  | 10 | 1 | 14028G  | 10 | 1 | 10118C  | 10 | 1 |
| 9338T  | 10 | 1 | 4260T   | 10 | 1 | 5969T   | 10 | 1 |
| 9101G  | 10 | 1 | 9759T   | 10 | 1 | 8859T   | 10 | 1 |
| 13942G | 10 | 1 | 11710T  | 10 | 1 | 16176T! | 10 | 1 |
| 8379G  | 10 | 1 | 12483T  | 10 | 1 | 1673C   | 10 | 1 |
| 8855T  | 10 | 1 | 4200G   | 10 | 1 | 4314C   | 10 | 1 |
| 9701C  | 10 | 1 | 8906G   | 10 | 1 | 6740G   | 10 | 1 |
| 15512C | 10 | 1 | 9881C   | 10 | 1 | 8158T   | 10 | 1 |
| 12135T | 10 | 1 | 2397T   | 10 | 1 | 8664G   | 10 | 1 |
| 5418C  | 10 | 1 | 4711T   | 10 | 1 | 13810A  | 10 | 1 |
| 5084G  | 10 | 1 | 8279C   | 10 | 1 | 15811T  | 10 | 1 |
| 9212T  | 10 | 1 | 10610T  | 10 | 1 | 12756A  | 10 | 1 |
| 16155G | 10 | 1 | 12510T  | 10 | 1 | 15521C  | 10 | 1 |
| 6122T  | 10 | 1 | 56T     | 10 | 1 | 16241T  | 10 | 1 |
| 13911G | 10 | 1 | 4002C   | 10 | 1 | 14338T  | 10 | 1 |
| 14248T | 10 | 1 | 7022G   | 10 | 1 | 15748C  | 10 | 1 |
| 1119C  | 10 | 1 | 11321G  | 10 | 1 | 15937T  | 10 | 1 |
| 3497T  | 10 | 1 | 16304G  | 10 | 1 | 259G    | 10 | 1 |
| 8844T  | 10 | 1 | 329A    | 10 | 1 | 517G    | 10 | 1 |
| 6416G  | 10 | 1 | 6770G   | 10 | 1 | 9587G   | 10 | 1 |
| 7319C  | 10 | 1 | 634A    | 10 | 1 | 14512C  | 10 | 1 |
| 14452G | 10 | 1 | 7007T   | 10 | 1 | 13468T  | 10 | 1 |
| 5826C  | 10 | 1 | 10987G  | 10 | 1 | 11288T  | 10 | 1 |
| 7909T  | 10 | 1 | 12151G  | 10 | 1 | 591A    | 10 | 1 |
| 8167A  | 10 | 1 | 12459G  | 10 | 1 | 10088T  | 10 | 1 |
| 3571T  | 10 | 1 | 13885A  | 10 | 1 | 16337T  | 10 | 1 |
| 1716C  | 10 | 1 | 6764A   | 10 | 1 | 12831T  | 10 | 1 |
| 13629G | 10 | 1 | 11047A  | 10 | 1 | 3172A   | 10 | 1 |
| 14209G | 10 | 1 | 11735T  | 10 | 1 | 13452A  | 10 | 1 |
| 8823C  | 10 | 1 | 9142A   | 10 | 1 | 285T    | 10 | 1 |
| 4612C  | 10 | 1 | 9869G   | 10 | 1 | 14070G  | 10 | 1 |
| 5127G  | 10 | 1 | 13773G  | 10 | 1 | 15954C  | 10 | 1 |
| 6332G  | 10 | 1 | 299d    | 10 | 1 | 2218T   | 10 | 1 |
| 8291G  | 10 | 1 | 7268G   | 10 | 1 | 3158.1T | 10 | 1 |
| 16523G | 10 | 1 | 7490G   | 10 | 1 | 8766T   | 10 | 1 |
| 15235G | 10 | 1 | 8805G   | 10 | 1 | 6041T   | 10 | 1 |
| 6960T  | 10 | 1 | 9174C   | 10 | 1 | 7253G   | 10 | 1 |
| 10523G | 10 | 1 | 10631A  | 10 | 1 | 10885C  | 10 | 1 |
| 9189T  | 10 | 1 | 13236G  | 10 | 1 | 11566G  | 10 | 1 |
| 14158T | 10 | 1 | 14194T  | 10 | 1 | 4224T   | 10 | 1 |
| 15046G | 10 | 1 | 15307T  | 10 | 1 | 10972G  | 10 | 1 |
| 8059T  | 10 | 1 | 6290T   | 10 | 1 | 10326A  | 10 | 1 |
| 16243A | 10 | 1 | 7280T   | 10 | 1 | 14278C  | 10 | 1 |
| 8829T  | 10 | 1 | 13539G  | 10 | 1 | 7792T   | 10 | 1 |
| 15851G | 10 | 1 | 7981T   | 10 | 1 | 14574T  | 10 | 1 |
| 11146T | 10 | 1 | 10631T  | 10 | 1 | 1187C   | 10 | 1 |
| 11207T | 10 | 1 | 13768A  | 10 | 1 | 12582G  | 10 | 1 |
| 4895G  | 10 | 1 | 15334T  | 10 | 1 | 16428A  | 10 | 1 |
| 15850C | 10 | 1 | 237G    | 10 | 1 | 12331G  | 10 | 1 |
| 8894T  | 10 | 1 | 2248C   | 10 | 1 | 10544T  | 10 | 1 |

|         |    |   |         |    |   |         |    |   |
|---------|----|---|---------|----|---|---------|----|---|
| 13002A  | 10 | 1 | 13017G  | 10 | 1 | 9614G   | 10 | 1 |
| 4924C   | 10 | 1 | 6920A   | 10 | 1 | 5790A   | 10 | 1 |
| 10858C  | 10 | 1 | 10262G  | 10 | 1 | 14935C  | 10 | 1 |
| 12491T  | 10 | 1 | 14259A  | 10 | 1 | 8676T   | 10 | 1 |
| 3192T   | 10 | 1 | 16169A  | 10 | 1 | 9767T   | 10 | 1 |
| 12103A  | 10 | 1 | 3535A   | 10 | 1 | 8938G   | 10 | 1 |
| 14003T  | 10 | 1 | 3348G   | 10 | 1 | 7277G   | 10 | 1 |
| 3198G   | 10 | 1 | 14179G  | 10 | 1 | 7894G   | 10 | 1 |
| 4745T   | 10 | 1 | 3969T   | 10 | 1 | 6045T   | 10 | 1 |
| 252C    | 10 | 1 | 4172A   | 10 | 1 | 13734C  | 10 | 1 |
| 9293T   | 10 | 1 | 1472A   | 10 | 1 | 15907G  | 10 | 1 |
| 14198A  | 10 | 1 | 12376G  | 10 | 1 | 16129C  | 10 | 1 |
| 15903G  | 10 | 1 | 12727C  | 10 | 1 | 108G    | 10 | 1 |
| 8933T   | 10 | 1 | 10336C  | 10 | 1 | 10127G  | 10 | 1 |
| 12308G! | 10 | 1 | 14562T  | 10 | 1 | 988A    | 10 | 1 |
| 13285G  | 10 | 1 | 9896G   | 10 | 1 | 3229.1A | 10 | 1 |
| 455d    | 10 | 1 | 10784G  | 10 | 1 | 2526T   | 10 | 1 |
| 14684T  | 10 | 1 | 12022T  | 10 | 1 | 9664G   | 10 | 1 |
| 13351T  | 10 | 1 | 9891C   | 10 | 1 | 15891T  | 10 | 1 |
| 9469T   | 10 | 1 | 8282T   | 10 | 1 | 5686T   | 10 | 1 |
| 10768G  | 10 | 1 | 11539T  | 10 | 1 | 394T    | 10 | 1 |
| 7960C   | 10 | 1 | 9335A   | 10 | 1 | 3170A   | 10 | 1 |
| 10709C  | 10 | 1 | 15790T  | 10 | 1 | 14139G  | 10 | 1 |
| 3750T   | 10 | 1 | 11268T  | 10 | 1 | 2294G   | 10 | 1 |
| 7978T   | 10 | 1 | 15634G  | 10 | 1 | 10506G  | 10 | 1 |
| 11107T  | 10 | 1 | 4021G   | 10 | 1 | 6452T   | 10 | 1 |
| 14577G  | 10 | 1 | 12097T  | 10 | 1 | 14921A  | 10 | 1 |
| 7768G   | 10 | 1 | 13928A  | 10 | 1 | 2766A   | 10 | 1 |
| 7028T!  | 10 | 1 | 5554A   | 10 | 1 | 12843C  | 10 | 1 |
| 7385G   | 10 | 1 | 11272G  | 10 | 1 | 4188G   | 10 | 1 |
| 1341T   | 10 | 1 | 14215C  | 10 | 1 | 4640A   | 10 | 1 |
| 8428A   | 10 | 1 | 16079T  | 10 | 1 | 3546A   | 10 | 1 |
| 10301G  | 10 | 1 | 9031T   | 10 | 1 | 8778T   | 10 | 1 |
| 15533G  | 10 | 1 | 8407A   | 10 | 1 | 2707G   | 10 | 1 |
| 55A     | 10 | 1 | 9779T   | 10 | 1 | 9770C   | 10 | 1 |
| 516T    | 10 | 1 | 794A    | 10 | 1 | 8490C   | 10 | 1 |
| 6341T   | 10 | 1 | 1692T   | 10 | 1 | 15327T  | 10 | 1 |
| 5437T   | 10 | 1 | 2672G   | 10 | 1 | 6047G   | 10 | 1 |
| 742C    | 10 | 1 | 11929C  | 10 | 1 | 11332T  | 10 | 1 |
| 2225A   | 10 | 1 | 7735G   | 10 | 1 | 15693C  | 10 | 1 |
| 15631G  | 10 | 1 | 16219G! | 10 | 1 | 8818T   | 10 | 1 |
| 7085C   | 10 | 1 | 14179G! | 10 | 1 | 12937G  | 10 | 1 |
| 3507A   | 10 | 1 | 7700T   | 10 | 1 | 15544A  | 10 | 1 |
| 3498T   | 10 | 1 | 9571T   | 10 | 1 | 745G    | 10 | 1 |
| 1721T   | 10 | 1 | 12535T  | 10 | 1 | 296T    | 10 | 1 |
| 16270T! | 10 | 1 | 12842C  | 10 | 1 | 13158G  | 10 | 1 |
| 896G    | 10 | 1 | 15892C  | 10 | 1 | 16356C! | 10 | 1 |
| 1834C   | 10 | 1 | 12530G  | 10 | 1 | 8496C   | 10 | 1 |
| 5452T   | 10 | 1 | 437T    | 10 | 1 | 6047G!  | 10 | 1 |
| 3212T   | 10 | 1 | 793T    | 10 | 1 | 2792G   | 10 | 1 |
| 16398A  | 10 | 1 | 3688C   | 10 | 1 | 6665T   | 10 | 1 |
| 12678C  | 10 | 1 | 4965G   | 10 | 1 | 7705C   | 10 | 1 |
| 14767C  | 10 | 1 | 11013T  | 10 | 1 | 3672G   | 10 | 1 |
| 11725G  | 10 | 1 | 16206C  | 10 | 1 | 8642G   | 10 | 1 |
| 13630G  | 10 | 1 | 14883T  | 10 | 1 | 5752d   | 10 | 1 |
| 13420T  | 10 | 1 | 5186T   | 10 | 1 | 9989C   | 10 | 1 |
| 4616T   | 10 | 1 | 12106T  | 10 | 1 | 7265G   | 10 | 1 |
| 517T    | 10 | 1 | 15049T  | 10 | 1 | 11965T  | 10 | 1 |

|         |    |   |         |    |   |         |    |   |
|---------|----|---|---------|----|---|---------|----|---|
| 13528G  | 10 | 1 | 7927G   | 10 | 1 | 16491C  | 10 | 1 |
| 13565T  | 10 | 1 | 15850G  | 10 | 1 | 16494T  | 10 | 1 |
| 15373G  | 10 | 1 | 14605T  | 10 | 1 | 2628C   | 10 | 1 |
| 9070G   | 10 | 1 | 15625A  | 10 | 1 | 382T    | 10 | 1 |
| 14866T  | 10 | 1 | 8952C   | 10 | 1 | 1900G   | 10 | 1 |
| 10676T  | 10 | 1 | 12134C  | 10 | 1 | 8519A   | 10 | 1 |
| 2405.1C | 10 | 1 | 15031T  | 10 | 1 | 5074C   | 10 | 1 |
| 5319T   | 10 | 1 | 15544T  | 10 | 1 | 12961G  | 10 | 1 |
| 5567C   | 10 | 1 | 15946T  | 10 | 1 | 8742G   | 10 | 1 |
| 10692T  | 10 | 1 | 9371T   | 10 | 1 | 6278C   | 10 | 1 |
| 6386T   | 10 | 1 | 12738G  | 10 | 1 | 9190T   | 10 | 1 |
| 12615G  | 10 | 1 | 6845T   | 10 | 1 | 12073T  | 10 | 1 |
| 3741T   | 10 | 1 | 10154G  | 10 | 1 | 574C    | 10 | 1 |
| 5360T   | 10 | 1 | 368G    | 10 | 1 | 12408A  | 10 | 1 |
| 270G    | 10 | 1 | 9093G   | 10 | 1 | 6506T   | 10 | 1 |
| 5486T   | 10 | 1 | 7082T   | 10 | 1 | 7804G   | 10 | 1 |
| 4502C   | 10 | 1 | 10698T  | 10 | 1 | 3534T   | 10 | 1 |
| 5265G   | 10 | 1 | 9006G   | 10 | 1 | 953C    | 10 | 1 |
| 12094T  | 10 | 1 | 6890G   | 10 | 1 | 3783A   | 10 | 1 |
| 14533T  | 10 | 1 | 1819C   | 10 | 1 | 16201T  | 10 | 1 |
| 8574T   | 10 | 1 | 10478T  | 10 | 1 | 210G!   | 10 | 1 |
| 14245T  | 10 | 1 | 14142G  | 10 | 1 | 3672T   | 10 | 1 |
| 9480C   | 10 | 1 | 7930G   | 10 | 1 | 5981C   | 10 | 1 |
| 5240G   | 10 | 1 | 15325G  | 10 | 1 | 2639T   | 10 | 1 |
| 12135A  | 10 | 1 | 11348T  | 10 | 1 | 8836G   | 10 | 1 |
| 4053G   | 10 | 1 | 512C    | 10 | 1 | 16176G  | 10 | 1 |
| 9777A   | 10 | 1 | 13293T  | 10 | 1 | 1703T   | 10 | 1 |
| 9338G   | 10 | 1 | 11549T  | 10 | 1 | 3921A   | 10 | 1 |
| 14167T  | 10 | 1 | 324T    | 10 | 1 | 4960T   | 10 | 1 |
| 6546T   | 10 | 1 | 5130C   | 10 | 1 | 8472T   | 10 | 1 |
| 10550G  | 10 | 1 | 2217T   | 10 | 1 | 12822G  | 10 | 1 |
| 497T    | 10 | 1 | 14037G  | 10 | 1 | 9335T   | 10 | 1 |
| 6060G   | 10 | 1 | 11869A  | 10 | 1 | 11362G  | 10 | 1 |
| 8276.1C | 10 | 1 | 11374G  | 10 | 1 | 1703T!  | 10 | 1 |
| 14388G  | 10 | 1 | 560T    | 10 | 1 | 8084G   | 10 | 1 |
| 8842C   | 10 | 1 | 9852T   | 10 | 1 | 8309T   | 10 | 1 |
| 7729G   | 10 | 1 | 7031T   | 10 | 1 | 8763C   | 10 | 1 |
| 9800C   | 10 | 1 | 12705T  | 10 | 1 | 8261G   | 10 | 1 |
| 7278C   | 10 | 1 | 13780G  | 10 | 1 | 7010T   | 10 | 1 |
| 4748T   | 10 | 1 | 669C    | 10 | 1 | 8469C   | 10 | 1 |
| 7918T   | 10 | 1 | 2702A   | 10 | 1 | 12092T  | 10 | 1 |
| 13117G  | 10 | 1 | 5315G   | 10 | 1 | 1719A!  | 10 | 1 |
| 7559G   | 10 | 1 | 16147G  | 10 | 1 | 5507A   | 10 | 1 |
| 10697T  | 10 | 1 | 2702A!  | 10 | 1 | 11626C  | 10 | 1 |
| 8522T   | 10 | 1 | 1711T   | 10 | 1 | 6974G   | 10 | 1 |
| 11840T  | 10 | 1 | 7750T   | 10 | 1 | 7864T   | 10 | 1 |
| 4295G   | 10 | 1 | 4721G   | 10 | 1 | 119C    | 10 | 1 |
| 8098G   | 10 | 1 | 250C    | 10 | 1 | 14981C  | 10 | 1 |
| 8856C   | 10 | 1 | 4529T   | 10 | 1 | 513C    | 10 | 1 |
| 10029G  | 10 | 1 | 8616T   | 10 | 1 | 12923T  | 10 | 1 |
| 280G    | 10 | 1 | 3990T   | 10 | 1 | 192C    | 10 | 1 |
| 9448G   | 10 | 1 | 9966A!  | 10 | 1 | 11947G! | 10 | 1 |
| 6975C   | 10 | 1 | 13488C  | 10 | 1 | 15775G  | 10 | 1 |
| 5264T   | 10 | 1 | 16391A! | 10 | 1 | 9275G   | 10 | 1 |
| 11071T  | 10 | 1 | 7796G   | 10 | 1 | 139C    | 10 | 1 |
| 12017G  | 10 | 1 | 5922T   | 10 | 1 | 16177G  | 10 | 1 |
| 1926T   | 10 | 1 | 2835A   | 10 | 1 | 60.1TT  | 10 | 1 |
| 4640T   | 10 | 1 | 2849A   | 10 | 1 | 64d     | 10 | 1 |

|         |    |   |         |    |   |         |    |   |
|---------|----|---|---------|----|---|---------|----|---|
| 65d     | 10 | 1 | 3330T   | 10 | 1 | 5514G   | 10 | 1 |
| 66C     | 10 | 1 | 9301T   | 10 | 1 | 9126C   | 10 | 1 |
| 8002T   | 10 | 1 | 12166C  | 10 | 1 | 15436T  | 10 | 1 |
| 16211T  | 10 | 1 | 16331G  | 10 | 1 | 449C    | 10 | 1 |
| 14097T  | 10 | 1 | 6308T   | 10 | 1 | 9524G   | 10 | 1 |
| 571T    | 10 | 1 | 7112T   | 10 | 1 | 9716A   | 10 | 1 |
| 8653G   | 10 | 1 | 2638C   | 10 | 1 | 13752C  | 10 | 1 |
| 9815T   | 10 | 1 | 14275T  | 10 | 1 | 2857C   | 10 | 1 |
| 11128G  | 10 | 1 | 7724T   | 10 | 1 | 8962G   | 10 | 1 |
| 15945T  | 10 | 1 | 3307.1A | 10 | 1 | 9711T   | 10 | 1 |
| 75T     | 10 | 1 | 15386T  | 10 | 1 | 13140G  | 10 | 1 |
| 6710G   | 10 | 1 | 8947T   | 10 | 1 | 15379T  | 10 | 1 |
| 16466G  | 10 | 1 | 5494G   | 10 | 1 | 6950T   | 10 | 1 |
| 5135T   | 10 | 1 | 10199T  | 10 | 1 | 7228G   | 10 | 1 |
| 8483G   | 10 | 1 | 6488C   | 10 | 1 | 8340A   | 10 | 1 |
| 14485T  | 10 | 1 | 16178G  | 10 | 1 | 11536T  | 10 | 1 |
| 2760G   | 10 | 1 | 2071C   | 10 | 1 | 8628T   | 10 | 1 |
| 7885C   | 10 | 1 | 6491A   | 10 | 1 | 16160G  | 10 | 1 |
| 16257A  | 10 | 1 | 7124G   | 10 | 1 | 13461C  | 10 | 1 |
| 15095G  | 10 | 1 | 16239A  | 10 | 1 | 15341C  | 10 | 1 |
| 4688A   | 10 | 1 | 15074C  | 10 | 1 | 10637T  | 10 | 1 |
| 5553G   | 10 | 1 | 9473C   | 10 | 1 | 12777G  | 10 | 1 |
| 13857G  | 10 | 1 | 8471T   | 10 | 1 | 7468T   | 10 | 1 |
| 3729G   | 10 | 1 | 487G    | 10 | 1 | 10094T  | 10 | 1 |
| 13742T  | 10 | 1 | 2762A   | 10 | 1 | 16227C  | 10 | 1 |
| 10530C  | 10 | 1 | 16175T  | 10 | 1 | 9140T   | 10 | 1 |
| 11968T  | 10 | 1 | 3840G   | 10 | 1 | 509T    | 10 | 1 |
| 9821G   | 10 | 1 | 10343T  | 10 | 1 | 15885T  | 10 | 1 |
| 10607T  | 10 | 1 | 13443C  | 10 | 1 | 16303A  | 10 | 1 |
| 13183G  | 10 | 1 | 15847T  | 10 | 1 | 150G    | 10 | 1 |
| 14996A  | 10 | 1 | 93.1T   | 10 | 1 | 271G    | 10 | 1 |
| 16187d  | 10 | 1 | 97C     | 10 | 1 | 8506C   | 10 | 1 |
| 7933G   | 10 | 1 | 10344G  | 10 | 1 | 10786C  | 10 | 1 |
| 15460T  | 10 | 1 | 16097C  | 10 | 1 | 4181G   | 10 | 1 |
| 6941C   | 10 | 1 | 16098G  | 10 | 1 | 9866T   | 10 | 1 |
| 2856T   | 10 | 1 | 9668T   | 10 | 1 | 3169T   | 10 | 1 |
| 3543T   | 10 | 1 | 16466C  | 10 | 1 | 13770A  | 10 | 1 |
| 3873G   | 10 | 1 | 3516T   | 10 | 1 | 6371T   | 10 | 1 |
| 6245G   | 10 | 1 | 6935T   | 10 | 1 | 15654C  | 10 | 1 |
| 8130T   | 10 | 1 | 9518T   | 10 | 1 | 256T    | 10 | 1 |
| 9459T   | 10 | 1 | 8552C   | 10 | 1 | 225A    | 10 | 1 |
| 16291A  | 10 | 1 | 16083T  | 10 | 1 | 8913G   | 10 | 1 |
| 11581A  | 10 | 1 | 654C    | 10 | 1 | 6113G   | 10 | 1 |
| 10908C  | 10 | 1 | 3687T   | 10 | 1 | 16213A! | 10 | 1 |
| 14431C  | 10 | 1 | 13287T  | 10 | 1 | 8422G   | 10 | 1 |
| 261T    | 10 | 1 | 4257G   | 10 | 1 | 16254C  | 10 | 1 |
| 5234T   | 10 | 1 | 6707C   | 10 | 1 | 2120A   | 10 | 1 |
| 9503G   | 10 | 1 | 9754G   | 10 | 1 | 15469G  | 10 | 1 |
| 9596G   | 10 | 1 | 16039A  | 10 | 1 | 8814T   | 10 | 1 |
| 11728T  | 10 | 1 | 97T     | 10 | 1 | 4722G   | 10 | 1 |
| 14357G  | 10 | 1 | 6101T   | 10 | 1 | 7400A   | 10 | 1 |
| 5704T   | 10 | 1 | 14067T  | 10 | 1 | 14818C  | 10 | 1 |
| 337d    | 10 | 1 | 3408T   | 10 | 1 | 10532G  | 10 | 1 |
| 10583G  | 10 | 1 | 8409T   | 10 | 1 | 13251T  | 10 | 1 |
| 292.1AT | 10 | 1 | 298A    | 10 | 1 | 4577T   | 10 | 1 |
| 9159T   | 10 | 1 | 11557G  | 10 | 1 | 7570G   | 10 | 1 |
| 1736G   | 10 | 1 | 14929T  | 10 | 1 | 5427G   | 10 | 1 |
| 8794T   | 10 | 1 | 16292A  | 10 | 1 | 9830T   | 10 | 1 |

|         |    |   |               |    |   |          |    |   |
|---------|----|---|---------------|----|---|----------|----|---|
| 8425G   | 10 | 1 | 5372G         | 10 | 1 | 5813G    | 10 | 1 |
| 5186G   | 10 | 1 | 14272T        | 10 | 1 | 5930C    | 10 | 1 |
| 6626C   | 10 | 1 | 14584C        | 10 | 1 | 9965C    | 10 | 1 |
| 8463G   | 10 | 1 | 3498G         | 10 | 1 | 13080T   | 10 | 1 |
| 15310C  | 10 | 1 | 10899G        | 10 | 1 | 13755T   | 10 | 1 |
| 12084T  | 10 | 1 | 15208G        | 10 | 1 | 10400T   | 10 | 1 |
| 3948G   | 10 | 1 | 6587T         | 10 | 1 | 12403T   | 10 | 1 |
| 13327G  | 10 | 1 | 5774A         | 10 | 1 | 16249C!  | 10 | 1 |
| 15358G  | 10 | 1 | 11024T        | 10 | 1 | 375G     | 10 | 1 |
| 15793T  | 10 | 1 | 16325d        | 10 | 1 | 1820G    | 10 | 1 |
| 1656d   | 10 | 1 | 3675G         | 10 | 1 | 13542C   | 10 | 1 |
| 9840A   | 10 | 1 | 8289.1CCCCCTC | 10 | 1 | 3906A    | 10 | 1 |
| 13035A  | 10 | 1 | TACCCCTCTA    |    |   | 9629G    | 10 | 1 |
| 9540C   | 10 | 1 | 12738C        | 10 | 1 | 12873C   | 10 | 1 |
| 10873C  | 10 | 1 | 9327G         | 10 | 1 | 9740T    | 10 | 1 |
| 14461C  | 10 | 1 | 14571A        | 10 | 1 | 8607T    | 10 | 1 |
| 14851G  | 10 | 1 | 90A           | 10 | 1 | 10694G   | 10 | 1 |
| 4088T   | 10 | 1 | 4219A         | 10 | 1 | 14515C   | 10 | 1 |
| 2357T   | 10 | 1 | 4844G         | 10 | 1 | 15770T   | 10 | 1 |
| 10184T  | 10 | 1 | 11318C        | 10 | 1 | 15247G   | 10 | 1 |
| 573T    | 10 | 1 | 1737G         | 10 | 1 | 4385T    | 10 | 1 |
| 3450T   | 10 | 1 | 15076G        | 10 | 1 | 7433T    | 10 | 1 |
| 15311G  | 10 | 1 | 5102G         | 10 | 1 | 14974T   | 10 | 1 |
| 15824G  | 10 | 1 | 3277A         | 10 | 1 | 15691G   | 10 | 1 |
| 1710C   | 10 | 1 | 7370T         | 10 | 1 | 4697T    | 10 | 1 |
| 3385G   | 10 | 1 | 2000T         | 10 | 1 | 732G     | 10 | 1 |
| 16124C! | 10 | 1 | 10816G        | 10 | 1 | 12715G   | 10 | 1 |
| 3441G   | 10 | 1 | 16265T        | 10 | 1 | 5461T    | 10 | 1 |
| 5211T   | 10 | 1 | 10286G        | 10 | 1 | 12012T   | 10 | 1 |
| 13790G  | 10 | 1 | 12248G        | 10 | 1 | 11083G   | 10 | 1 |
| 9079G   | 10 | 1 | 13197T        | 10 | 1 | 8502G    | 10 | 1 |
| 3420T   | 10 | 1 | 5584G         | 10 | 1 | 8396G    | 10 | 1 |
| 4350T   | 10 | 1 | 398C          | 10 | 1 | 16274A!  | 10 | 1 |
| 5194T   | 10 | 1 | 16041G        | 10 | 1 | 7472G    | 10 | 1 |
| 7819A   | 10 | 1 | 12591T        | 10 | 1 | 15700T   | 10 | 1 |
| 8527G   | 10 | 1 | 12173C        | 10 | 1 | 526A     | 10 | 1 |
| 8932T   | 10 | 1 | 13800A        | 10 | 1 | 7702A    | 10 | 1 |
| 10070T  | 10 | 1 | 13687T        | 10 | 1 | 11041A   | 10 | 1 |
| 272G    | 10 | 1 | 14818G        | 10 | 1 | 12657C   | 10 | 1 |
| 7235A   | 10 | 1 | 15388C        | 10 | 1 | 6035G    | 10 | 1 |
| 8799G   | 10 | 1 | 6620G         | 10 | 1 | 1453G    | 10 | 1 |
| 374.1A  | 10 | 1 | 8649G         | 10 | 1 | 2831T    | 10 | 1 |
| 5342T   | 10 | 1 | 9467C         | 10 | 1 | 3630T    | 10 | 1 |
| 959T    | 10 | 1 | 13992T        | 10 | 1 | 16169.1C | 10 | 1 |
| 4643A   | 10 | 1 | 9007T         | 10 | 1 | 8632C    | 10 | 1 |
| 5181G   | 10 | 1 | 13862G        | 10 | 1 | 6128T    | 10 | 1 |
| 10604C  | 10 | 1 | 6401G         | 10 | 1 | 8556C    | 10 | 1 |
| 11770C  | 10 | 1 | 8311C         | 10 | 1 | 10845T   | 10 | 1 |
| 498.1C  | 10 | 1 | 8817G         | 10 | 1 | 5783A    | 10 | 1 |
| 678C    | 10 | 1 | 368.1AGAA     | 10 | 1 | 10727T   | 10 | 1 |
| 3582T   | 10 | 1 | 650C          | 10 | 1 | 9010A    | 10 | 1 |
| 13886C  | 10 | 1 | 4388G         | 10 | 1 | 12031A   | 10 | 1 |
| 921C    | 10 | 1 | 8781A         | 10 | 1 | 14440G   | 10 | 1 |
| 7648T   | 10 | 1 | 12175C        | 10 | 1 | 13820C   | 10 | 1 |
| 3579G   | 10 | 1 | 14862T        | 10 | 1 | 12813T   | 10 | 1 |
| 10837T  | 10 | 1 | 16256A        | 10 | 1 | 13836G   | 10 | 1 |
| 8014C   | 10 | 1 | 606G          | 10 | 1 | 511T     | 10 | 1 |
| 3957G   | 10 | 1 | 3879G         | 10 | 1 | 11413G   | 10 | 1 |

|                     |    |   |         |    |   |          |    |   |
|---------------------|----|---|---------|----|---|----------|----|---|
| 9863T               | 10 | 1 | 6228T   | 10 | 1 | 3576T    | 10 | 1 |
| 12498T              | 10 | 1 | 10232G  | 10 | 1 | 4884G    | 10 | 1 |
| 4099T               | 10 | 1 | 3995G   | 10 | 1 | 10891G   | 10 | 1 |
| 15487G              | 10 | 1 | 14115T  | 10 | 1 | 5846T    | 10 | 1 |
| 1808G               | 10 | 1 | 15912T  | 10 | 1 | 9263G    | 10 | 1 |
| 3987G               | 10 | 1 | 958T    | 10 | 1 | 12624C   | 10 | 1 |
| 9186T               | 10 | 1 | 14314G  | 10 | 1 | 10304C   | 10 | 1 |
| 10748G              | 10 | 1 | 5324T   | 10 | 1 | 47A      | 10 | 1 |
| 12103T              | 10 | 1 | 4850T   | 10 | 1 | 16259.1A | 10 | 1 |
| 16260A              | 10 | 1 | 11665T  | 10 | 1 | 15145T   | 10 | 1 |
| 488G                | 10 | 1 | 12091C  | 10 | 1 | 1788T    | 10 | 1 |
| 8289.1CCCCCTC<br>TA | 10 | 1 | 14755T  | 10 | 1 | 3392C    | 10 | 1 |
| 14706G              | 10 | 1 | 12906A  | 10 | 1 | 14433T   | 10 | 1 |
| 15259T              | 10 | 1 | 11815A  | 10 | 1 | 96T      | 10 | 1 |
| 10160T              | 10 | 1 | 3606G   | 10 | 1 | 473T     | 10 | 1 |
| 13303T              | 10 | 1 | 13204A  | 10 | 1 | 15523T   | 10 | 1 |
| 10556T              | 10 | 1 | 146A    | 10 | 1 | 7100G    | 10 | 1 |
| 2074d               | 10 | 1 | 5775C   | 10 | 1 | 7307G    | 10 | 1 |
| 16000T              | 10 | 1 | 630T    | 10 | 1 | 595.1C   | 10 | 1 |
| 4734G               | 10 | 1 | 6681C   | 10 | 1 | 16327T!  | 10 | 1 |
| 7049G               | 10 | 1 | 16392C  | 10 | 1 | 1719.1G  | 10 | 1 |
| 15848G              | 10 | 1 | 3912G   | 10 | 1 | 16518T   | 10 | 1 |
| 12897G              | 10 | 1 | 10897T  | 10 | 1 | 1670T    | 10 | 1 |
| 13089C              | 10 | 1 | 11932T  | 10 | 1 | 10682G   | 10 | 1 |
| 9061T               | 10 | 1 | 15338T  | 10 | 1 | 13968A   | 10 | 1 |
| 3921T               | 10 | 1 | 11527T  | 10 | 1 | 6338G    | 10 | 1 |
| 3399G               | 10 | 1 | 7196A   | 10 | 1 | 333C     | 10 | 1 |
| 16144A              | 10 | 1 | 15487T  | 10 | 1 | 2905G    | 10 | 1 |
| 8547C               | 10 | 1 | 8453G   | 10 | 1 | 13635G   | 10 | 1 |
| 7421G               | 10 | 1 | 16470A  | 10 | 1 | 15261A   | 10 | 1 |
| 10547T              | 10 | 1 | 4670T   | 10 | 1 | 740A     | 10 | 1 |
| 8784T               | 10 | 1 | 13993T  | 10 | 1 | 12930G   | 10 | 1 |
| 14066T              | 10 | 1 | 5100T   | 10 | 1 | 11078G   | 10 | 1 |
| 14410C              | 10 | 1 | 3552A   | 10 | 1 | 10208C   | 10 | 1 |
| 4851T               | 10 | 1 | 14318C  | 10 | 1 | 8931G    | 10 | 1 |
| 13368A!             | 10 | 1 | 290d    | 10 | 1 | 11782T   | 10 | 1 |
| 472G                | 10 | 1 | 11147C  | 10 | 1 | 15475G   | 10 | 1 |
| 1888A!              | 10 | 1 | 4242T   | 10 | 1 | 3520G    | 10 | 1 |
| 461T                | 10 | 1 | 9557T   | 10 | 1 | 11719A!  | 10 | 1 |
| 3486T               | 10 | 1 | 14524G  | 10 | 1 | 4841A    | 10 | 1 |
| 15094T              | 10 | 1 | 5157T   | 10 | 1 | 10653A   | 10 | 1 |
| 16256G              | 10 | 1 | 4381G   | 10 | 1 | 255A     | 10 | 1 |
| 9824C               | 10 | 1 | 4911G   | 10 | 1 | 814G     | 10 | 1 |
| 11722C              | 10 | 1 | 9130T   | 10 | 1 | 4712T    | 10 | 1 |
| 15886T              | 10 | 1 | 258T    | 10 | 1 | 14052T   | 10 | 1 |
| 6018A               | 10 | 1 | 7091G   | 10 | 1 | 7142C    | 10 | 1 |
| 13110T              | 10 | 1 | 12411T  | 10 | 1 | 15671G   | 10 | 1 |
| 7784G               | 10 | 1 | 11794C  | 10 | 1 | 11872T   | 10 | 1 |
| 13788T              | 10 | 1 | 7022A   | 10 | 1 | 3522T    | 10 | 1 |
| 15422G              | 10 | 1 | 7343G   | 10 | 1 | 10951A   | 10 | 1 |
| 8176C               | 10 | 1 | 928G    | 10 | 1 | 6842C    | 10 | 1 |
| 4071T               | 10 | 1 | 12378T  | 10 | 1 | 7609C    | 10 | 1 |
| 12405T              | 10 | 1 | 3395G   | 10 | 1 | 13626T   | 10 | 1 |
| 5351G               | 10 | 1 | 7331T   | 10 | 1 | 9020T    | 10 | 1 |
| 11659T              | 10 | 1 | 14324C  | 10 | 1 | 4102A    | 10 | 1 |
| 10159T              | 10 | 1 | 7999C   | 10 | 1 | 723T     | 10 | 1 |
| 6125G               | 10 | 1 | 2232.2A | 10 | 1 | 6340T    | 10 | 1 |
|                     |    |   | 8508G   | 10 | 1 | 9080G    | 10 | 1 |

|         |    |   |        |    |   |         |    |   |
|---------|----|---|--------|----|---|---------|----|---|
| 15178G  | 10 | 1 | 6032A  | 10 | 1 | 16086C! | 10 | 1 |
| 10742C  | 10 | 1 | 10130G | 10 | 1 | 16429T  | 10 | 1 |
| 4140T   | 10 | 1 | 11008T | 10 | 1 | 9663A   | 10 | 1 |
| 12549T  | 10 | 1 | 16343T | 10 | 1 | 3651G   | 10 | 1 |
| 15071C  | 10 | 1 | 11810T | 10 | 1 | 6275G   | 10 | 1 |
| 3172.1C | 10 | 1 | 5582C  | 10 | 1 | 15481A  | 10 | 1 |
| 7250G   | 10 | 1 | 11629T | 10 | 1 | 13246C  | 10 | 1 |
| 3083C   | 10 | 1 | 13659C | 10 | 1 | 14122G  | 10 | 1 |
| 14337T  | 10 | 1 | 16147A | 10 | 1 | 2135G   | 10 | 1 |
| 10529G  | 10 | 1 | 930C   | 10 | 1 | 13754T  | 10 | 1 |
| 326G    | 10 | 1 | 12973T | 10 | 1 | 464G    | 10 | 1 |
| 6531T   | 10 | 1 | 862G   | 10 | 1 | 4230T   | 10 | 1 |
| 13074G  | 10 | 1 | 10324C | 10 | 1 | 4050T   | 10 | 1 |
| 14340T  | 10 | 1 | 15802G | 10 | 1 | 13452T  | 10 | 1 |
| 13890T  | 10 | 1 | 12465T | 10 | 1 | 7681T   | 10 | 1 |
| 14790G  | 10 | 1 | 240G   | 10 | 1 | 208C    | 10 | 1 |
| 13928T  | 10 | 1 | 390T   | 10 | 1 | 92A!    | 10 | 1 |
| 5192G   | 10 | 1 | 572T   | 10 | 1 | 7993C   | 10 | 1 |
| 3523G   | 10 | 1 | 9302T  | 10 | 1 | 4707T   | 10 | 1 |
| 1289A   | 10 | 1 | 11023G | 10 | 1 | 14404T  | 10 | 1 |
| 4170T   | 10 | 1 | 965d   | 10 | 1 | 2359T   | 10 | 1 |
| 12030G  | 10 | 1 | 1763G  | 10 | 1 | 10924T  | 10 | 1 |
| 15010G  | 10 | 1 | 8509T  | 10 | 1 | 1407A   | 10 | 1 |
| 15463G  | 10 | 1 | 8360G  | 10 | 1 | 4913C   | 10 | 1 |
| 15651T  | 10 | 1 | 7313T  | 10 | 1 | 13047G  | 10 | 1 |
| 318C!   | 10 | 1 | 16068C | 10 | 1 | 9037G   | 10 | 1 |
| 11359G  | 10 | 1 | 7040C  | 10 | 1 | 10214T  | 10 | 1 |
| 1331G   | 10 | 1 | 375T   | 10 | 1 | 10978C  | 10 | 1 |
| 1331G!  | 10 | 1 | 12398T | 10 | 1 | 4787G   | 10 | 1 |
| 8749C   | 10 | 1 | 16330C | 10 | 1 | 12675T  | 10 | 1 |
| 3897T   | 10 | 1 | 16545C | 10 | 1 | 15516T  | 10 | 1 |
| 5336T   | 10 | 1 | 13113G | 10 | 1 | 11554T  | 10 | 1 |
| 15884T  | 10 | 1 | 8776T  | 10 | 1 | 744G    | 10 | 1 |
| 9604G   | 10 | 1 | 13144T | 10 | 1 | 5456T   | 10 | 1 |
| 15860G  | 10 | 1 | 16290A | 10 | 1 | 12267G  | 10 | 1 |
| 1299G   | 10 | 1 | 11521G | 10 | 1 | 12268C  | 10 | 1 |
| 6167G   | 10 | 1 | 12190G | 10 | 1 | 15070T  | 10 | 1 |
| 12178T  | 10 | 1 | 13932T | 10 | 1 | 4335T   | 10 | 1 |
| 12040G  | 10 | 1 | 9201T  | 10 | 1 | 8454G   | 10 | 1 |
| 2226C   | 10 | 1 | 537T   | 10 | 1 | 12684A  | 10 | 1 |
| 7600A   | 10 | 1 | 11554G | 10 | 1 | 14484C  | 10 | 1 |
| 8063C   | 10 | 1 | 15451T | 10 | 1 | 12876T  | 10 | 1 |
| 16194G  | 10 | 1 | 16077T | 10 | 1 | 1524G   | 10 | 1 |
| 6737G   | 10 | 1 | 8857A  | 10 | 1 | 3975T   | 10 | 1 |
| 4505T   | 10 | 1 | 656C   | 10 | 1 | 8973G   | 10 | 1 |
| 7503d   | 10 | 1 | 2315G  | 10 | 1 | 11014T  | 10 | 1 |
| 4680A   | 10 | 1 | 4342G  | 10 | 1 | 868T    | 10 | 1 |
| 8861T   | 10 | 1 | 14137T | 10 | 1 | 11023T  | 10 | 1 |
| 6086C   | 10 | 1 | 14370G | 10 | 1 | 15258G  | 10 | 1 |
| 9599T   | 10 | 1 | 14674C | 10 | 1 | 15676T  | 10 | 1 |
| 10411G  | 10 | 1 | 4198T  | 10 | 1 | 6299G   | 10 | 1 |
| 5045G   | 10 | 1 | 12370T | 10 | 1 | 9269T   | 10 | 1 |
| 8405G   | 10 | 1 | 14870G | 10 | 1 | 15754T  | 10 | 1 |
| 9182A   | 10 | 1 | 6281G  | 10 | 1 | 8768T   | 10 | 1 |
| 11665A  | 10 | 1 | 9590G  | 10 | 1 | 14130T  | 10 | 1 |
| 15468T  | 10 | 1 | 7145T  | 10 | 1 | 14260G  | 10 | 1 |
| 9012G   | 10 | 1 | 10691T | 10 | 1 | 15625T  | 10 | 1 |
| 15924G! | 10 | 1 | 15363G | 10 | 1 | 5423G   | 10 | 1 |



|        |    |   |         |    |   |         |    |   |
|--------|----|---|---------|----|---|---------|----|---|
| 13731G | 10 | 1 | 10514G  | 10 | 1 | 57G     | 10 | 1 |
| 5124A  | 10 | 1 | 6605G   | 10 | 1 | 15719C  | 10 | 1 |
| 15796C | 10 | 1 | 11542T  | 10 | 1 | 10816T  | 10 | 1 |
| 4079G  | 10 | 1 | 4688G   | 10 | 1 | 13059T  | 10 | 1 |
| 6563T  | 10 | 1 | 8297T   | 10 | 1 | 6314T   | 10 | 1 |
| 10969T | 10 | 1 | 1462T   | 10 | 1 | 14047G  | 10 | 1 |
| 15865G | 10 | 1 | 6020T   | 10 | 1 | 8674G   | 10 | 1 |
| 10361C | 10 | 1 | 16275G  | 10 | 1 | 16142T  | 10 | 1 |
| 16095T | 10 | 1 | 15349T  | 10 | 1 | 10874T  | 10 | 1 |
| 7406T  | 10 | 1 | 4525C   | 10 | 1 | 10644A  | 10 | 1 |
| 4020T  | 10 | 1 | 614G    | 10 | 1 | 14027T  | 10 | 1 |
| 14743G | 10 | 1 | 173C    | 10 | 1 | 16325C! | 10 | 1 |
| 502T   | 10 | 1 | 3540C   | 10 | 1 | 56G     | 10 | 1 |
| 5432G  | 10 | 1 | 8279.1T | 10 | 1 | 245C    | 10 | 1 |
| 10670T | 10 | 1 | 1409d   | 10 | 1 | 9419T   | 10 | 1 |
| 5118T  | 10 | 1 | 13407G  | 10 | 1 | 3402G   | 10 | 1 |
| 8056G  | 10 | 1 | 3209G   | 10 | 1 | 1943G   | 10 | 1 |
| 4234T  | 10 | 1 | 8345T   | 10 | 1 | 15877A  | 10 | 1 |
| 11224G | 10 | 1 | 15760T  | 10 | 1 | 15868T  | 10 | 1 |
| 15328G | 10 | 1 | 6728G   | 10 | 1 | 5325T   | 10 | 1 |
| 10565T | 10 | 1 | 15910T  | 10 | 1 | 3206T   | 10 | 1 |
| 6320C  | 10 | 1 | 2735A   | 10 | 1 | 15757G  | 10 | 1 |
| 9036T  | 10 | 1 | 15510G  | 10 | 1 | 5459T   | 10 | 1 |
| 12410G | 10 | 1 | 15520G  | 10 | 1 | 5466G   | 10 | 1 |
| 13371T | 10 | 1 | 4763T   | 10 | 1 | 15448T  | 10 | 1 |
| 4101C  | 10 | 1 | 9935C   | 10 | 1 | 10601C  | 10 | 1 |
| 4102T  | 10 | 1 | 11431T  | 10 | 1 | 469G    | 10 | 1 |
| 4135C  | 10 | 1 | 292d    | 10 | 1 | 10181T  | 10 | 1 |
| 15352G | 10 | 1 | 293d    | 10 | 1 | 8450C   | 10 | 1 |
| 3523T  | 10 | 1 | 294d    | 10 | 1 | 14091G  | 10 | 1 |
| 59d    | 10 | 1 | 4902C   | 10 | 1 | 14815T  | 10 | 1 |
| 60d    | 10 | 1 | 5489A   | 10 | 1 | 13720T  | 10 | 1 |
| 65.1T  | 10 | 1 | 13806T  | 10 | 1 | 431T    | 10 | 1 |
| 66T    | 10 | 1 | 7664A!  | 10 | 1 | 6689T   | 10 | 1 |
| 15938T | 10 | 1 | 736T    | 10 | 1 | 14560C  | 10 | 1 |
| 8704G  | 10 | 1 | 4392T   | 10 | 1 | 6578G   | 10 | 1 |
| 9383T  | 10 | 1 | 5499T   | 10 | 1 | 15370T  | 10 | 1 |
| 15589A | 10 | 1 | 6050C   | 10 | 1 | 9785T   | 10 | 1 |
| 9297T  | 10 | 1 | 1872C   | 10 | 1 | 1382C   | 10 | 1 |
| 4508T  | 10 | 1 | 15820T  | 10 | 1 | 9824A   | 10 | 1 |
| 2880G  | 10 | 1 | 2263A   | 10 | 1 | 15524G  | 10 | 1 |
| 7229T  | 10 | 1 | 3399T   | 10 | 1 | 10104T  | 10 | 1 |
| 8597C  | 10 | 1 | 3533T   | 10 | 1 | 14287C  | 10 | 1 |
| 10310C | 10 | 1 | 11708G  | 10 | 1 | 6005T   | 10 | 1 |
| 6083T  | 10 | 1 | 3442T   | 10 | 1 | 9296T   | 10 | 1 |
| 15241G | 10 | 1 | 3669G   | 10 | 1 | 14867T  | 10 | 1 |
| 10268T | 10 | 1 | 7661T   | 10 | 1 | 13707A  | 10 | 1 |
| 6575G  | 10 | 1 | 8437T   | 10 | 1 | 15331A  | 10 | 1 |
| 12850G | 10 | 1 | 14341T  | 10 | 1 | 13182C  | 10 | 1 |
| 8080A  | 10 | 1 | 7793T   | 10 | 1 | 15832T  | 10 | 1 |
| 8616A  | 10 | 1 | 7064C   | 10 | 1 | 13239T  | 10 | 1 |
| 6884T  | 10 | 1 | 647G    | 10 | 1 | 2766T   | 10 | 1 |
| 8251A! | 10 | 1 | 1352A   | 10 | 1 | 856G    | 10 | 1 |
| 8554G  | 10 | 1 | 2695A   | 10 | 1 | 14692G  | 10 | 1 |
| 3780T  | 10 | 1 | 7939T   | 10 | 1 | 9431T   | 10 | 1 |
| 11263T | 10 | 1 | 5178A   | 10 | 1 | 4233C   | 10 | 1 |
| 3780T! | 10 | 1 | 8414T   | 10 | 1 | 15391A  | 10 | 1 |
| 15647T | 10 | 1 | 2092T   | 10 | 1 | 6503C   | 10 | 1 |

|         |    |   |         |    |   |          |    |   |
|---------|----|---|---------|----|---|----------|----|---|
| 7757A   | 10 | 1 | 1107C   | 10 | 1 | 4104G    | 10 | 1 |
| 12085T  | 10 | 1 | 752T    | 10 | 1 | 9221G    | 10 | 1 |
| 9536T   | 10 | 1 | 68A     | 10 | 1 | 7274T    | 10 | 1 |
| 9495C   | 10 | 1 | 3496T   | 10 | 1 | 12693G   | 10 | 1 |
| 14207A  | 10 | 1 | 13278G  | 10 | 1 | 5285G    | 10 | 1 |
| 7493T   | 10 | 1 | 16102C  | 10 | 1 | 15421G   | 10 | 1 |
| 8910A   | 10 | 1 | 8071G   | 10 | 1 | 13615G   | 10 | 1 |
| 1106T   | 10 | 1 | 3528T   | 10 | 1 | 15735T   | 10 | 1 |
| 14857C  | 10 | 1 | 8479G   | 10 | 1 | 11692T   | 10 | 1 |
| 13716G  | 10 | 1 | 13356C  | 10 | 1 | 6663G    | 10 | 1 |
| 1935G   | 10 | 1 | 681C    | 10 | 1 | 8604C    | 10 | 1 |
| 8683G   | 10 | 1 | 15724G  | 10 | 1 | 6311T    | 10 | 1 |
| 5021C   | 10 | 1 | 3759G   | 10 | 1 | 10954T   | 10 | 1 |
| 4538T   | 10 | 1 | 12666C  | 10 | 1 | 10903T   | 10 | 1 |
| 11255C  | 10 | 1 | 15724G! | 10 | 1 | 7858T    | 10 | 1 |
| 4343G   | 10 | 1 | 15769C  | 10 | 1 | 9854C    | 10 | 1 |
| 15518T  | 10 | 1 | 16292G  | 10 | 1 | 14965G   | 10 | 1 |
| 9004T   | 10 | 1 | 9992T   | 10 | 1 | 12976T   | 10 | 1 |
| 13512G  | 10 | 1 | 13954T  | 10 | 1 | 3495A    | 10 | 1 |
| 298T    | 10 | 1 | 4200T   | 10 | 1 | 8541A    | 10 | 1 |
| 12966A  | 10 | 1 | 16190T  | 10 | 1 | 14599G   | 10 | 1 |
| 504C    | 10 | 1 | 7669T   | 10 | 1 | 2746C    | 10 | 1 |
| 11092G  | 10 | 1 | 8580T   | 10 | 1 | 14464G   | 10 | 1 |
| 7181T   | 10 | 1 | 15737A  | 10 | 1 | 12903C   | 10 | 1 |
| 8946G   | 10 | 1 | 6701G   | 10 | 1 | 5366A    | 10 | 1 |
| 9458T   | 10 | 1 | 7879G   | 10 | 1 | 3573A    | 10 | 1 |
| 12990G  | 10 | 1 | 4679C   | 10 | 1 | 8553T    | 10 | 1 |
| 71d     | 10 | 1 | 5441T   | 10 | 1 | 16229C   | 10 | 1 |
| 16301T! | 10 | 1 | 11344G  | 10 | 1 | 15939T   | 10 | 1 |
| 16234G  | 10 | 1 | 16207T  | 10 | 1 | 11767T   | 10 | 1 |
| 1810G   | 10 | 1 | 10813T  | 10 | 1 | 8721G    | 10 | 1 |
| 7785C   | 10 | 1 | 4029A   | 10 | 1 | 13068G   | 10 | 1 |
| 9046G   | 10 | 1 | 8974G   | 10 | 1 | 14894C   | 10 | 1 |
| 3558G   | 10 | 1 | 12661T  | 10 | 1 | 593A     | 10 | 1 |
| 15295T  | 10 | 1 | 13497G  | 10 | 1 | 13125T   | 10 | 1 |
| 7980C   | 10 | 1 | 244G    | 10 | 1 | 6959T    | 10 | 1 |
| 6852A   | 10 | 1 | 9855G   | 10 | 1 | 12480T   | 10 | 1 |
| 11218T  | 10 | 1 | 16293T  | 10 | 1 | 6040C    | 10 | 1 |
| 7445C   | 10 | 1 | 709A!   | 10 | 1 | 7624A    | 10 | 1 |
| 13086T  | 10 | 1 | 1413C   | 10 | 1 | 1706T    | 10 | 1 |
| 9578G   | 10 | 1 | 547G    | 10 | 1 | 2358G    | 10 | 1 |
| 13573A  | 10 | 1 | 4949G   | 10 | 1 | 4370C    | 10 | 1 |
| 8273T   | 10 | 1 | 10783C  | 10 | 1 | 5331A    | 10 | 1 |
| 15529A  | 10 | 1 | 11137C  | 10 | 1 | 8080T    | 10 | 1 |
| 2330C   | 10 | 1 | 391C    | 10 | 1 | 12948G   | 10 | 1 |
| 2178G   | 10 | 1 | 5128G   | 10 | 1 | 14059G   | 10 | 1 |
| 9355G   | 10 | 1 | 10265C  | 10 | 1 | 418T     | 10 | 1 |
| 8762C   | 10 | 1 | 2220T   | 10 | 1 | 10828C   | 10 | 1 |
| 12651C  | 10 | 1 | 4206G   | 10 | 1 | 13924T   | 10 | 1 |
| 1148G   | 10 | 1 | 3594T   | 10 | 1 | 9350G    | 10 | 1 |
| 12088T  | 10 | 1 | 185C    | 10 | 1 | 15944.1T | 10 | 1 |
| 1222G   | 10 | 1 | 770T    | 10 | 1 | 4185T    | 10 | 1 |
| 3492G   | 10 | 1 | 1461G   | 10 | 1 | 12011C   | 10 | 1 |
| 16042A  | 10 | 1 | 5267C   | 10 | 1 | 680C     | 10 | 1 |
| 12750T  | 10 | 1 | 6002G   | 10 | 1 | 3200A    | 10 | 1 |
| 16355A  | 10 | 1 | 9332T   | 10 | 1 | 15849T   | 10 | 1 |
| 6704G   | 10 | 1 | 11743T  | 10 | 1 | 93G!     | 10 | 1 |
| 15901G  | 10 | 1 | 14533A  | 10 | 1 | 13184C   | 10 | 1 |

|         |    |   |          |    |   |         |    |   |
|---------|----|---|----------|----|---|---------|----|---|
| 15574T  | 10 | 1 | 9272T    | 10 | 1 | 2245C   | 10 | 1 |
| 8733C   | 10 | 1 | 1291C    | 10 | 1 | 8191G   | 10 | 1 |
| 3254A   | 10 | 1 | 8619T    | 10 | 1 | 14106C  | 10 | 1 |
| 14845T  | 10 | 1 | 14393G   | 10 | 1 | 15099C  | 10 | 1 |
| 15703G  | 10 | 1 | 11335T   | 10 | 1 | 5608T   | 10 | 1 |
| 5069T   | 10 | 1 | 10793T   | 10 | 1 | 7568C   | 10 | 1 |
| 6014C   | 10 | 1 | 11654G   | 10 | 1 | 16168T! | 10 | 1 |
| 9971T   | 10 | 1 | 7744C    | 10 | 1 | 5060T   | 10 | 1 |
| 825A    | 10 | 1 | 5899.1C! | 10 | 1 | 14001G  | 10 | 1 |
| 8655T   | 10 | 1 | 7070T    | 10 | 1 | 14142T  | 10 | 1 |
| 15301A! | 10 | 1 | 7160T    | 10 | 1 | 16259A  | 10 | 1 |
| 3423C   | 10 | 1 | 7301G    | 10 | 1 | 185A!   | 10 | 1 |
| 851G    | 10 | 1 | 6723A    | 10 | 1 | 5711G   | 10 | 1 |
| 8582T   | 10 | 1 | 7741C    | 10 | 1 | 4598C   | 10 | 1 |
| 455.2T  | 10 | 1 | 14127G   | 10 | 1 | 9178A   | 10 | 1 |
| 4496T   | 10 | 1 | 11164G   | 10 | 1 | 13116T  | 10 | 1 |
| 8754T   | 10 | 1 | 6209T    | 10 | 1 | 9734T   | 10 | 1 |
| 14819C  | 10 | 1 | 7675T    | 10 | 1 | 3372C   | 10 | 1 |
| 13105G! | 10 | 1 | 5087C    | 10 | 1 | 11269T  | 10 | 1 |
| 535T    | 10 | 1 | 9108G    | 10 | 1 | 4466G   | 10 | 1 |
| 2417G   | 10 | 1 | 3275G    | 10 | 1 | 4943G   | 10 | 1 |
| 4976G   | 10 | 1 | 633G     | 10 | 1 | 5141T   | 10 | 1 |
| 9809C   | 10 | 1 | 5894d    | 10 | 1 | 5603T!  | 10 | 1 |
| 12546T  | 10 | 1 | 10071C   | 10 | 1 | 8224G   | 10 | 1 |
| 1717C   | 10 | 1 | 13741G   | 10 | 1 | 10039G  | 10 | 1 |
| 2484T   | 10 | 1 | 4706G    | 10 | 1 | 12528A  | 10 | 1 |
| 4676T   | 10 | 1 | 2251G    | 10 | 1 | 12705T! | 10 | 1 |
| 12950G! | 10 | 1 | 291T     | 10 | 1 | 13767A  | 10 | 1 |
| 7146G   | 10 | 1 | 12425G   | 10 | 1 | 14109T  | 10 | 1 |
| 185T    | 10 | 1 | 6221A    | 10 | 1 | 4194T   | 10 | 1 |
| 357G    | 10 | 1 | 7055G!   | 10 | 1 | 978G    | 10 | 1 |
| 6548T   | 10 | 1 | 11302T   | 10 | 1 | 5321T   | 10 | 1 |
| 6989G   | 10 | 1 | 15978T   | 10 | 1 | 184A    | 10 | 1 |
| 8248G   | 10 | 1 | 13981T   | 10 | 1 | 783G    | 10 | 1 |
| 13880A  | 10 | 1 | 14794T   | 10 | 1 | 850C    | 10 | 1 |
| 7915T   | 10 | 1 | 3210T    | 10 | 1 | 7257G   | 10 | 1 |
| 15103T  | 10 | 1 | 8417T    | 10 | 1 | 8922T   | 10 | 1 |
| 15763G  | 10 | 1 | 11317G   | 10 | 1 | 9136G   | 10 | 1 |
| 5509C   | 10 | 1 | 1686G    | 10 | 1 | 14020C  | 10 | 1 |
| 12512T  | 10 | 1 | 2283T!   | 10 | 1 | 14374C  | 10 | 1 |
| 13893G  | 10 | 1 | 3096C    | 10 | 1 | 16291G  | 10 | 1 |
| 16264T! | 10 | 1 | 248G     | 10 | 1 | 2836A   | 10 | 1 |
| 2395d   | 10 | 1 | 3525T    | 10 | 1 | 10939T  | 10 | 1 |
| 13485G  | 10 | 1 | 3600T    | 10 | 1 | 8922T!  | 10 | 1 |
| 3796T   | 10 | 1 | 11852A   | 10 | 1 | 2060G   | 10 | 1 |
| 4454A   | 10 | 1 | 14669G   | 10 | 1 | 9347G!  | 10 | 1 |
| 8087C   | 10 | 1 | 4312T    | 10 | 1 | 9884T   | 10 | 1 |
| 467T    | 10 | 1 | 10664T   | 10 | 1 | 9136G!  | 10 | 1 |
| 12930T  | 10 | 1 | 13276G   | 10 | 1 | 8113A   | 10 | 1 |
| 9311C   | 10 | 1 | 3516A    | 10 | 1 | 12142G  | 10 | 1 |
| 8769G   | 10 | 1 | 9347G    | 10 | 1 | 12798T  | 10 | 1 |
| 9580G   | 10 | 1 | 9818T    | 10 | 1 | 10319G  | 10 | 1 |
| 12164A  | 10 | 1 | 2245G    | 10 | 1 | 2491.1C | 10 | 1 |
| 2863C   | 10 | 1 | 5603T    | 10 | 1 | 5104T   | 10 | 1 |
| 4506G   | 10 | 1 | 15136T   | 10 | 1 | 13506T! | 10 | 1 |
| 4634C   | 10 | 1 | 8428T    | 10 | 1 | 15731A  | 10 | 1 |
| 7692C   | 10 | 1 | 16188G   | 10 | 1 | 9105T   | 10 | 1 |
| 7693T   | 10 | 1 | 2759C    | 10 | 1 | 7967T   | 10 | 1 |

---

|         |    |   |        |    |   |
|---------|----|---|--------|----|---|
| 114A    | 10 | 1 | 2623G  | 10 | 1 |
| 16294G  | 10 | 1 | 4574G  | 10 | 1 |
| 12609A  | 10 | 1 | 1386C  | 10 | 1 |
| 3618C   | 10 | 1 | 5515G  | 10 | 1 |
| 2484.1C | 10 | 1 | 3756G! | 10 | 1 |
| 4562C   | 10 | 1 | 9776T  | 10 | 1 |
| 10707G  | 10 | 1 | 13466C | 10 | 1 |
| 11341G  | 10 | 1 | 14326C | 10 | 1 |
| 2285C   | 10 | 1 | 9476G  | 10 | 1 |
| 2758A!  | 10 | 1 | 10745T | 10 | 1 |
| 2882C   | 10 | 1 | 294A   | 10 | 1 |
| 14659T  | 10 | 1 | 4038G  | 10 | 1 |
| 6692G   | 10 | 1 | 4204C  | 10 | 1 |
| 16474T  | 10 | 1 | 6644T  | 10 | 1 |
| 2951G   | 10 | 1 | 8284T  | 10 | 1 |
| 13062G  | 10 | 1 | 8420G  | 10 | 1 |
| 957T    | 10 | 1 | 4052T  | 10 | 1 |
| 8970T   | 10 | 1 | 6134T  | 10 | 1 |
| 12303T  | 10 | 1 | 12562T | 10 | 1 |
| 12436T  | 10 | 1 | 8725G  | 10 | 1 |
| 15337T  | 10 | 1 | 15541C | 10 | 1 |
| 15692G  | 10 | 1 | 9090A  | 10 | 1 |
| 16230G! | 10 | 1 | 6377T  | 10 | 1 |
| 5029C   | 10 | 1 | 9488T  | 10 | 1 |
| 4044G   | 10 | 1 | 15312C | 10 | 1 |
| 7154G   | 10 | 1 | 15461C | 10 | 1 |
| 597T    | 10 | 1 | 15586C | 10 | 1 |
| 2072G   | 10 | 1 | 6170T  | 10 | 1 |
| 4896C   | 10 | 1 | 10114C | 10 | 1 |
| 2609C   | 10 | 1 | 10128A | 10 | 1 |

---

Suppl.Table 2: Data from Li et al. (1) checked according haplogroup concordance in HaploGrep 2 with Phylotree 16. Out of the 2,000 samples in this NGS study, 91 show minor haplogroup discordances, which HaploGrep 2 highlights mostly because of incomplete data. The sample name contains the haplogroup used by the authors as of Phylotree 13. Raw data can be found in their Supplementary Table 1: <http://www.nature.com/ejhg/journal/v22/n8/extref/ejhg2013282x1.xls>

| Sample         | Kulczynski (Quality)      | Hamming         | Jaccard     | Kimura2P                      |
|----------------|---------------------------|-----------------|-------------|-------------------------------|
| 123804_J1c5    | J1c5f (0.920)             | J1c5f           | J1c5f       | J1c5                          |
| 122765_H1a3    | H (0.767)                 | H               | H1a3        | H1a3, H, H3+73                |
| 100200536_T2f1 | T2f1a1 (0.973)            | T2f1a1          | T2f1a1      | T2                            |
| 55926_T2f1     | T2f1a1 (0.961)            | T2f1a1          | T2f1a1      | T2                            |
| 14546-3_H1     | H1 (0.793)                | H1              | H1e+16129   | H1, H1e+16129, H1j1, H2+16129 |
| 128343_H2a2a   | H1ab (0.560)              | H2a2a1          | H1ab        | H2a2a1                        |
| 5217785_V3     | V+@72 (0.902)             | V3a1            | V3a1        | V3, V3a1, V+@72               |
| 115006_T2f     | T2f7 (0.963)              | T2f7            | T2f7        | T2                            |
| 5152350_H2a2a  | H1ba (0.579)              | H2a2a1          | H1ba        | H2a2a1                        |
| 5198911_H1     | H1 (0.898)                | H1              | H1bx        | H1, H1bx                      |
| 82526_J2a1a1   | J2a1a1 (0.962)            | J2a1a1, J2a1a1a | J2a1a1a     | J2a1a1a                       |
| 5173313_U5b1   | U5b1+16189+@16192 (0.921) | U5b1            | U5b1        | U5b1, U5b1+16189+@16192       |
| 135074_T2f1    | T2f1a1 (0.982)            | T2f1a1          | T2f1a1      | T2+16189                      |
| 100200907_U7   | U7 (0.731)                | H2a             | U7          | H2a                           |
| 5190920_H2a2a  | H2a2a1 (0.500)            | H2a2a1          | B4a1a1a12   | H2a2a1                        |
| 146635_U4a3    | U4a2g (0.723)             | H6              | U4a2g       | H6                            |
| 104812_T2f1    | T2f1a1 (0.962)            | T2f1a1          | T2f1a1      | T2                            |
| 100200419_H26  | H26a1a1 (0.880)           | H26a1a          | H26a1a1     | H26a1a, H26a1a1               |
| 135785_T2f1    | T2f1a1 (0.991)            | T2f1a1          | T2f1a1      | T2+16189                      |
| 5188676_J1c3   | J1c3c (0.909)             | J1c3            | J1c3        | J1c3, J1c3c                   |
| 77254_H2a2a    | H1bm (0.541)              | H2a2a1          | H1bm        | H2a2a1                        |
| 5236_H2a2a     | H2a2a1 (0.500)            | H2a2a1          | P3          | H2a2a1                        |
| 5054_I2a       | I2a (0.770)               | H2+16129        | I2a         | H2+16129                      |
| 5190205_H6     | H6 (0.920)                | H6              | H6c         | H6, H6c                       |
| 5197780_T2f1   | T2f1a1 (0.973)            | T2f1a1          | T2f1a1      | T2                            |
| 5165532_T2b7   | T2b7a (0.969)             | T2b7a           | T2b7a       | T2b7a1                        |
| 100201194_T2f1 | T2f1a1 (0.943)            | T2f1a1          | T2f1a1      | T2                            |
| 59673_H2a2a    | H2a2a1 (0.500)            | H2a2a1          | H1as        | H2a2a1, H2a2a2                |
| 100200094_H1f  | H1ap (0.882)              | H1ap            | H1ap        | H1ap1                         |
| 90902-6_K1a11  | K1a11 (0.953)             | K1a11           | K1a11       | K1a+150                       |
| 5162555_H2a2a  | U4a2a (0.515)             | H2a2a1          | U4a2, U4a2a | H2a2a1                        |
| 100200313_HV   | H2+152 (0.834)            | H2+152          | HV          | H2+152                        |
| 41753_T2f      | T2f7 (0.967)              | T2f7            | T2f7        | T2+16189                      |
| 5152685_H27    | H (0.772)                 | H               | H           | H10+(16093)                   |
| 115743_U5a2b1a | U5a2b1a (0.941)           | U5a2b           | U5a2b1a     | U5a2b1a                       |
| 137686_T2f1    | T2f1a1 (0.960)            | T2f1a1          | T2f1a1      | T2                            |

|                   |                |                 |             |                            |
|-------------------|----------------|-----------------|-------------|----------------------------|
| 30682_T2f1        | T2f1a1 (0.977) | T2f1a1          | T2f1a1      | T2                         |
| 28206_K1a11       | K1a11 (0.984)  | K1a11           | K1a11       | K1a+150                    |
| 5254782_H2a2a     | R2c (0.515)    | H2a2a1          | H2a2a2      | H2a2a1, H2a2a2             |
| 5160886_H1c2      | H1c2a (0.746)  | H1c             | H1c2a       | H1c, H1c2a                 |
| 66102_J1c5        | J1c5f (0.881)  | J1c5f           | J1c5f       | J1c5                       |
| 100200778_T2f     | T2f7 (0.947)   | T2f7            | T2f7        | T2                         |
| 100200673_J2a1a1  | J2a1a1 (0.953) | J2a1a1, J2a1a1a | J2a1a1a     | J2a1a1a                    |
| 5249090_H5'36     | H5u (0.754)    | H2a2            | H5u         | H5'36, H2a2, H2, H5u       |
| 100201181_I4      | I4a (0.805)    | N1a1b           | N1a1b       | N1a1b                      |
| 5246371_H2a2a     | H86 (0.562)    | H2a2a1          | H86         | H2a2a1                     |
| 14313_H2a2a       | H39a (0.536)   | H2a2a1          | H39a        | H2a2a1                     |
| 158362_HV0        | HV (0.827)     | HV              | HV0+195     | HV0+195, HV0f              |
| 48801_R9b1a3      | R9b1a3 (0.901) | R9b1            | R9b1        | R9b1                       |
| 90464_J2a1a1      | J2a1a1 (0.959) | J2a1a1, J2a1a1a | J2a1a1a     | J2a1a1a                    |
| 91280_H2a2a       | U4a2a (0.515)  | H2a2a1          | U4a2, U4a2a | H2a2a1                     |
| 100200668_H6      | H6c1 (0.971)   | H6c1            | H6c1        | H6c                        |
| 5254465_H32       | H2+152 (0.777) | H2+152          | H1a3        | H32, H2a+152 16311, H2+152 |
| 125506_T2f        | T2f (0.918)    | T2f             | T2f         | T2+16189                   |
| 5184270_H2a2a     | U4a2a (0.515)  | H2a2a1          | U4a2, U4a2a | H2a2a1                     |
| 5222_T2b          | T2b (0.779)    | T2              | T2          | T2                         |
| 81620_H2a2a       | L4b (0.518)    | H2a2a1          | L4b         | H2a2a1                     |
| 100200732_HV0     | V+@72 (0.919)  | HV              | HV          | V+@72                      |
| 100200441_J1c5    | J1c5f (0.931)  | J1c5f           | J1c5f       | J1c5                       |
| 5210240_T2f1      | T2f1a1 (0.977) | T2f1a1          | T2f1a1      | T2+16189                   |
| F468-3_U5a2a      | U5a2 (0.915)   | U5a2            | U5a2        | U5a2a                      |
| 5192692_HV0b_HV0c | HV0e (0.671)   | H2a             | HV0e        | HV0+195                    |
| 126431_J2a1a1     | J2a1a1 (0.953) | J2a1a1, J2a1a1a | J2a1a1a     | J2a1a1a                    |
| 100200773_H2a2a   | H2a2a1 (0.500) | H2a2a1          | H26b        | H2a2a1                     |
| 99234_T2b7        | T2b7a (0.985)  | T2b7a           | T2b7a       | T2b7a1                     |
| 5242613_I1        | I (0.783)      | I               | I           | I1                         |
| 5204091_K1a11     | K1a11 (0.929)  | K1a11           | K1a11       | K1a+150                    |
| 34521_H2a2a       | R1 (0.533)     | H2a2a1          | H3+73       | H2a2a1                     |
| 5158123_H2a2a     | H2a1f (0.548)  | H2a2a1          | H2a1f       | H2a2a1                     |
| 5209960_T2f1      | T2f1a1 (0.973) | T2f1a1          | T2f1a1      | T2                         |
| 31845-6_T2        | T2 (0.895)     | T2j1            | T2j1        | T2                         |
| 2911705_H2a2a     | H2a2a1 (0.500) | H2a2a1          | H2a1f       | H2a2a1                     |
| 45603_T2f1        | T2f1a1 (0.973) | T2f1a1          | T2f1a1      | T2                         |
| 5221801_H13a1a1a  | H50 (0.850)    | H50             | H13a1a1a    | H13a1a1a, H2+152, H50, H66 |
| 90168_T2f1        | T2f1a1 (0.977) | T2f1a1          | T2f1a1      | T2                         |
| 136942_T2f        | T2f7 (0.967)   | T2f7            | T2f7        | T2+16189                   |
| 13054_T2f1        | T2f1a1 (0.972) | T2f1a1          | T2f1a1      | T2                         |
| 1005_H1a          | H1a (0.871)    | H2              | H1a         | H1a, H2                    |
| 112921_T2f1       | T2f1a1 (0.991) | T2f1a1          | T2f1a1      | T2+16189                   |

|                       |                    |          |             |                                              |
|-----------------------|--------------------|----------|-------------|----------------------------------------------|
| <b>127061_J1c5</b>    | J1c5f (0.913)      | J1c5f    | J1c5f       | J1c5                                         |
| <b>68703_H</b>        | H2+152 (0.808)     | H2+152   | H35a        | H2+152                                       |
| <b>5139_U3a</b>       | U3a1c (0.785)      | U3       | U3a1c       | U3                                           |
| <b>5024_H</b>         | H1a3 (0.806)       | H        | H1a3        | H, H1a3, H3+73                               |
| <b>158970_H2a2a</b>   | H2a2a1 (0.500)     | H2a2a1   | H39a        | H2a2a1                                       |
| <b>5014_J1c</b>       | J1c2o (0.716)      | H2a2a1   | J1c2o       | H2a2a1, R2'JT                                |
| <b>5222755_J1c3</b>   | J1c3c (0.865)      | J1c3     | J1c3        | J1c3, J1c3c                                  |
| <b>31426_T2f</b>      | T2f1 (0.977)       | T2f1     | T2f1        | T2+16189                                     |
| <b>100200836_H</b>    | H2+195+146 (0.896) | H        | H2+195+146  | H, H2a, H1+16311,<br>H3+16311,<br>H2+195+146 |
| <b>31452_H32</b>      | H2+152 (0.831)     | H2+152   | H32         | H32, H2+152                                  |
| <b>100200663_T2f1</b> | T2f1 (0.956)       | T2+16189 | T2+16189    | T2+16189                                     |
| <b>84022_H1</b>       | H1 (0.898)         | H1       | H1bx        | H1, H1bx                                     |
| <b>100201176_T2f1</b> | T2f1a1 (0.937)     | T2f1a1   | T2f1a1      | T2                                           |
| <b>57713_H2a2a</b>    | U4a2a (0.515)      | H2a2a1   | U4a2, U4a2a | H2a2a1                                       |
| <b>5153002_H2a2a</b>  | H1ah (0.546)       | H2a2a1   | H1ah        | H2a2a1                                       |
| <b>86623_T</b>        | T2b7a3 (0.750)     | H1bd     | T2b7a3      | H1bd, H1bm,<br>H1+16311                      |
| <b>87986_H15</b>      | H (0.809)          | H        | H15b        | H, H15b                                      |
| <b>100200409_H27</b>  | H1aa (0.876)       | H1aa     | H1aa        | H                                            |
| <b>5153094_H1c</b>    | H1c (0.784)        | H2       | H1c         | H2                                           |

Suppl.Table 3: Data from the 1000G Phase 1 (2) of 1,074 samples. The different classifications in this higher quality data especially seen in Kimura2P are here mostly the result of the weighting of polymorphisms: here the distance is based on an evolutionary model of transition and transversion rate, instead of the phylogenetic weights (see Suppl.Table1) otherwise applied. Input data can be found on:

[ftp://ftp.1000genomes.ebi.ac.uk/vol1/ftp/phase1/analysis\\_results/integrated\\_call\\_sets/ALL.chrMT.phase1\\_samtools\\_si.20101123.snps.low\\_coverage.genotypes.vcf.gz](ftp://ftp.1000genomes.ebi.ac.uk/vol1/ftp/phase1/analysis_results/integrated_call_sets/ALL.chrMT.phase1_samtools_si.20101123.snps.low_coverage.genotypes.vcf.gz)

| Sample  | Kulczynski (Quality) | Hamming     | Jaccard   | Kimura2P                         |
|---------|----------------------|-------------|-----------|----------------------------------|
| NA19782 | A2+(64) (0.951)      | A2+(64)     | A2+(64)   | A2v1+152                         |
| HG00635 | D4j15 (0.902)        | D4j15       | D4j15     | D4j+146                          |
| HG00581 | D4j15 (0.902)        | D4j15       | D4j15     | D4j+146                          |
| HG00578 | D4j15 (0.902)        | D4j15       | D4j15     | D4j+146                          |
| NA18573 | D5b1c1a (0.957)      | D5b1c1      | D5b1c1    | D5b1c1, D5b1c1a                  |
| NA20802 | H2+152 (0.801)       | H18         | H18       | H2+152, H32                      |
| NA20282 | L1b1a (0.982)        | L1b1a       | L1b1a     | L1b1a4                           |
| NA18519 | L2a1+143 (0.968)     | L2a1+143    | L2a1+143  | L2a1n                            |
| NA19625 | L2a1b+143 (0.970)    | L2a1b+143   | L2a1b+143 | L2a1+143                         |
| NA20414 | L2a1b+143 (0.970)    | L2a1b+143   | L2a1b+143 | L2a1+143                         |
| NA19225 | L2a1n (0.949)        | L2a1n       | L2a1n     | L2a1+143, L2a1+143+16189 (16192) |
| NA19247 | L2b (0.943)          | L2b3c, L2b  | L2b3c     | L2b3c                            |
| HG00406 | N9a10+16311 (0.956)  | N9a10+16311 | N9a10b    | N9a10b                           |
| HG00556 | N9a2'4'5 (0.861)     | N9a2'4'5    | N9a2      | N9a2, N9a2'4'5                   |
| NA12750 | T2f1a1 (0.958)       | T2f1a1      | T2f1a1    | T2+16189                         |
| HG00097 | T2f1a1 (0.977)       | T2f1a1      | T2f1a1    | T2+16189                         |
| NA12287 | U2e1b (0.944)        | U2e1b       | U2e1b     | U2e1b2                           |
| NA20765 | U5a2b2 (0.986)       | U5a2b2      | U5a2b2    | U5a2b2a1                         |
| HG00260 | U5b2a2c (0.976)      | U5b2a2c     | U5b2a2c   | U5b2a2                           |
| NA11893 | V+@72 (0.946)        | V23         | V23       | V23, V+@72                       |



Suppl.Table 4: Data from the 1000G Phase 3 (3) of 2,534 samples. Minor problems with the provided VCF file result in a higher number of discordant haplogroups. Input data to be found on the 1000G FTP Server: [http://ftp.1000genomes.ebi.ac.uk/vol1/ftp/release/20130502/ALL.chrMT.phase3\\_callmom.20130502.genotypes.vcf.gz](http://ftp.1000genomes.ebi.ac.uk/vol1/ftp/release/20130502/ALL.chrMT.phase3_callmom.20130502.genotypes.vcf.gz)

| Sample  | Kulczynski (Quality) | Hamming   | Jaccard   | Kimura2P         |
|---------|----------------------|-----------|-----------|------------------|
| HG02301 | A2+(64)+@153 (0,827) | A2        | A2        | A2+(64)+@153, A2 |
| HG01486 | A2+(64)+@153 (0,850) | A2        | A2        | A2+(64)+@153, A2 |
| HG01443 | A2+(64)+@153 (0,861) | A2        | A2        | A2+(64)+@153, A2 |
| HG01951 | A2+(64)+@153 (0,883) | A2        | A2        | A2+(64)+@153, A2 |
| HG01892 | A2+(64)+@153 (0,883) | A2        | A2        | A2+(64)+@153, A2 |
| NA19782 | A2+(64)+@153 (0,887) | A2        | A2        | A2+(64)+@153, A2 |
| HG02298 | A2+(64)+@153 (0,910) | A2        | A2        | A2+(64)+@153, A2 |
| NA19670 | A2d1a (0,917)        | A2d1a     | A2d1a     | A2, A2d          |
| NA19789 | A2d1a (0,923)        | A2d1a     | A2d1a     | A2, A2d          |
| HG01250 | A2q (0,879)          | A2        | A2q       | A2q, A2          |
| HG01259 | A2q (0,879)          | A2        | A2q       | A2q, A2          |
| HG01134 | A2q (0,879)          | A2        | A2q       | A2q, A2          |
| HG01372 | A2q (0,879)          | A2        | A2q       | A2q, A2          |
| HG01374 | A2q (0,879)          | A2        | A2q       | A2q, A2          |
| HG01342 | A2v (0,919)          | A2        | A2v       | A2v, A2          |
| HG01872 | B4 (0,742)           | B4        | B4        | R0+16189         |
| HG02072 | B4+16261 (0,827)     | B4+16261  | B4+16261  | R0+16189         |
| HG02122 | B4a (0,833)          | B4a       | B4a       | R0+16189         |
| NA18546 | B4a (0,833)          | B4a       | B4a       | R0+16189         |
| NA18617 | B4a1c+146 (0,854)    | B4a1c+146 | B4a1c+146 | R0+16189         |
| HG02409 | B4c (0,821)          | B4c       | B4c       | R0+16189         |
| HG02385 | B4c2 (0,903)         | B4c2      | B4c2      | R0+16189         |
| HG00419 | B4g (0,796)          | B4g       | B4g       | R                |
| HG00631 | B4g (0,933)          | B4g       | B4g       | R0+16189         |
| HG01869 | B4h (0,848)          | B4h       | B4h       | R0+16189         |
| HG02399 | B4h (0,855)          | B4h       | B4h       | R0+16189         |
| HG00654 | B4h (0,857)          | B4h       | B4h       | R0+16189         |
| HG00729 | B4h (0,866)          | B4h       | B4h       | R0+16189         |
| NA18614 | B4h1 (0,866)         | B4h1      | B4h1      | R0+16189         |
| NA18541 | B4i1 (0,895)         | B4i1      | B4i1      | R0+16189         |
| NA18536 | B4k (0,893)          | B4k       | B4k       | R0+16189         |
| NA18549 | B4k (0,938)          | B4k       | B4k       | R0+16189         |
| HG00543 | B5a2 (0,815)         | B5a2      | B5a2      | R30              |
| HG02164 | B6a (0,858)          | B6a       | B6a       | R11'B6           |
| HG02374 | B6a1 (0,813)         | B6a1      | B6a1      | R11'B6           |
| HG01982 | C (0,833)            | C         | C1b       | C1b              |
| HG01950 | C (0,839)            | C         | C1b       | C1b              |
| HG01303 | C (0,850)            | C         | C1c       | C1c              |

|                |                   |           |           |                                                       |
|----------------|-------------------|-----------|-----------|-------------------------------------------------------|
| <b>HG02292</b> | C (0,853)         | C         | C1b       | C1b                                                   |
| <b>HG01932</b> | C (0,857)         | C         | C1b       | C1b                                                   |
| <b>HG01942</b> | C (0,869)         | C         | C1b       | C1b                                                   |
| <b>HG02278</b> | C (0,870)         | C         | C1b       | C1b                                                   |
| <b>HG01961</b> | C (0,871)         | C         | C1b       | C1b                                                   |
| <b>HG01248</b> | C (0,872)         | C         | C1b       | C1b, C1d                                              |
| <b>HG02266</b> | C (0,880)         | C         | C         | C1b                                                   |
| <b>HG01571</b> | C1b (0,862)       | C         | C1b       | C1b                                                   |
| <b>HG01948</b> | C1b (0,887)       | C         | C         | C1b                                                   |
| <b>HG02275</b> | C1b (0,887)       | C         | C         | C1b                                                   |
| <b>HG01947</b> | C1b (0,899)       | C         | C         | C1b                                                   |
| <b>HG02265</b> | C1b (0,911)       | C         | C         | C1b                                                   |
| <b>NA19726</b> | C1b (0,913)       | C         | C         | C1b                                                   |
| <b>NA20299</b> | C1b+16311 (0,837) | C         | C1b+16311 | C1b+16311                                             |
| <b>HG01066</b> | C1c (0,862)       | C         | C1c       | C1c                                                   |
| <b>HG01944</b> | C1c (0,871)       | C         | C1c       | C1c                                                   |
| <b>NA19732</b> | C1c (0,875)       | C         | C1c       | C1c                                                   |
| <b>HG01369</b> | C1d1c1 (0,858)    | C         | C1d1d     | C1d1c1                                                |
| <b>HG02256</b> | C1d1c1 (0,880)    | C         | C         | C1d1c1, C1d, C1d1                                     |
| <b>HG01341</b> | C1d2 (0,901)      | C         | C         | C1d2, C1d                                             |
| <b>NA18566</b> | C5+16093 (0,871)  | C         | C5+16093  | C5+16093                                              |
| <b>HG02151</b> | C7a (0,937)       | C7a       | C7a       | C7a2                                                  |
| <b>HG00844</b> | C7a (0,937)       | C7a       | C7a       | C7a2                                                  |
| <b>HG01808</b> | C7a (0,944)       | C7a       | C7a       | C7a2                                                  |
| <b>HG00662</b> | D4b1b2 (0,911)    | D4b1b2    | D4b1b2    | D4b1b                                                 |
| <b>HG00635</b> | D4j15 (0,875)     | D4j15     | D4j15     | D4j+146                                               |
| <b>HG00581</b> | D4j15 (0,875)     | D4j15     | D4j15     | D4j+146                                               |
| <b>HG01852</b> | D5b1c1a (0,922)   | D5b1c1    | D5b1c1    | D5b1c1a, D5b1c1                                       |
| <b>NA18573</b> | D5b1c1a (0,924)   | D5b1c1    | D5b1c1    | D5b1c1a, D5b1c1                                       |
| <b>HG01800</b> | F1a1a (0,885)     | F1a1      | F1a1a     | F1a1a, F1a1                                           |
| <b>NA07051</b> | H (0,695)         | H         | H24b      | H, H1+16311, H3+16311, H3ao, H7a, H22, H24b, H76, H80 |
| <b>NA20809</b> | H3b3 (0,844)      | H3        | H3        | H3                                                    |
| <b>NA12778</b> | H52 (0,902)       | H52       | H52       | H10+(16093)                                           |
| <b>HG02652</b> | HV13 (0,766)      | HV13      | HV0       | HV13                                                  |
| <b>HG03238</b> | J1b8 (0,904)      | J1b8      | J1b8      | J1b                                                   |
| <b>NA12874</b> | J1c8a (0,953)     | J1c2      | J1c2      | J1c8a, J1c2, J1c8                                     |
| <b>HG02111</b> | L0a1a+200 (0,947) | L0a1a+200 | L0a1a+200 | L0a1a2                                                |
| <b>NA19042</b> | L0a1a+200 (0,948) | L0a1a+200 | L0a1a+200 | L0a1a2                                                |
| <b>NA19311</b> | L0a1a+200 (0,953) | L0a1a+200 | L0a1a+200 | L0a1a2                                                |
| <b>NA19027</b> | L0a1a+200 (0,953) | L0a1a+200 | L0a1a+200 | L0a1a2                                                |
| <b>NA19350</b> | L0a1a+200 (0,954) | L0a1a+200 | L0a1a+200 | L0a1a2                                                |
| <b>NA19379</b> | L0a1a+200 (0,956) | L0a1a+200 | L0a1a+200 | L0a1a2                                                |
| <b>HG01108</b> | L0a1a+200 (0,960) | L0a1a+200 | L0a1a+200 | L0a1a2                                                |

|                |                                   |                           |                           |                      |
|----------------|-----------------------------------|---------------------------|---------------------------|----------------------|
| <b>NA19440</b> | L0a1c (0,940)                     | L0a1                      | L0a1c                     | L0a1c, L0a1          |
| <b>HG02635</b> | L1b1a14 (0,963)                   | L1b1a14                   | L1b1a14                   | L1b1a+189            |
| <b>NA20282</b> | L1b1a4 (0,933)                    | L1b1a                     | L1b1a4                    | L1b1a4               |
| <b>HG03057</b> | L1b1a4 (0,954)                    | L1b1a                     | L1b1a4                    | L1b1a4               |
| <b>HG02562</b> | L1b1a7a (0,963)                   | L1b1a7                    | L1b1a7a                   | L1b1a7a, L1b1a7      |
| <b>HG03096</b> | L1c1c (0,891)                     | L1c1c                     | L1c1c                     | L1c1                 |
| <b>HG02611</b> | L1c1c (0,907)                     | L1c1c                     | L1c1c                     | L1c1'2'4'6           |
| <b>HG03464</b> | L1c1c (0,911)                     | L1c1c                     | L1c1c                     | L1c1                 |
| <b>NA18519</b> | L2a1+143 (0,941)                  | L2a1+143                  | L2a1+143                  | L2a1n                |
| <b>NA19225</b> | L2a1+143+16189<br>(16192) (0,937) | L2a1+143+16189<br>(16192) | L2a1+143+16189<br>(16192) | L2a1n                |
| <b>HG02325</b> | L2a1+143+16189<br>(16192) (0,941) | L2a1+143+16189<br>(16192) | L2a1+143+16189<br>(16192) | L2a1n                |
| <b>HG03342</b> | L2a1+143+16189<br>(16192) (0,955) | L2a1+143+16189<br>(16192) | L2a1+143+16189<br>(16192) | L2a1n                |
| <b>HG03121</b> | L2a1+143+16189<br>(16192) (0,965) | L2a1+143+16189<br>(16192) | L2a1+143+16189<br>(16192) | L2a1n                |
| <b>NA19099</b> | L2a1m1a (0,945)                   | L2a1m1a                   | L2a1m1a                   | L2a1m                |
| <b>HG02645</b> | L2b (0,947)                       | L2b                       | L2b                       | L2b3b                |
| <b>HG03294</b> | L3b1b (0,907)                     | L3b1b                     | L3b1b                     | L3b1                 |
| <b>HG02586</b> | L3d1b1b (0,908)                   | L3d1b1b                   | L3d1b1b                   | L3d1b1               |
| <b>HG02574</b> | L3d2a (0,895)                     | L3d2a                     | L3d2a                     | L3d2b                |
| <b>HG03247</b> | L3d2a (0,919)                     | L3d2a                     | L3d2a                     | L3d2b                |
| <b>HG03129</b> | L3d2a (0,938)                     | L3d2a                     | L3d2a                     | L3d2b                |
| <b>HG01073</b> | L3e1e2 (0,885)                    | L3e1e                     | L3e1e                     | L3e1e                |
| <b>HG01323</b> | L3e1e2 (0,904)                    | L3e1e                     | L3e1e                     | L3e1e                |
| <b>HG01326</b> | L3e1e2 (0,904)                    | L3e1e                     | L3e1e                     | L3e1e                |
| <b>HG03668</b> | M (0,765)                         | M                         | M3                        | M, M3, M9, M33+16362 |
| <b>HG04076</b> | M (0,848)                         | M                         | M3                        | M, M3                |
| <b>HG02024</b> | M10a1a1b1 (0,939)                 | M10a1a1b1                 | M10a1a1b1                 | M10a1a1b             |
| <b>HG02025</b> | M10a1a1b1 (0,939)                 | M10a1a1b1                 | M10a1a1b1                 | M10a1a1b             |
| <b>HG03730</b> | M18a (0,925)                      | M18                       | M18a                      | M18a, M18            |
| <b>HG03646</b> | M18a (0,941)                      | M18                       | M18                       | M18a, M18            |
| <b>HG04060</b> | M18a (0,957)                      | M18                       | M18                       | M18a, M18            |
| <b>HG02016</b> | M23 (0,763)                       | M23'75                    | M23                       | M23'75               |
| <b>HG02655</b> | M2a1a (0,901)                     | M2a1                      | M2a1                      | M2a1a, M2a1          |
| <b>HG02654</b> | M2a1a (0,912)                     | M2a1                      | M2a1                      | M2a1a, M2a1          |
| <b>HG02691</b> | M2a1a (0,920)                     | M2a1                      | M2a1                      | M2a1a, M2a1          |
| <b>HG03913</b> | M2a1a (0,931)                     | M2a1                      | M2a1                      | M2a1a, M2a1          |
| <b>HG04211</b> | M2a1a (0,939)                     | M2a1                      | M2a1                      | M2a1a, M2a1          |
| <b>HG02687</b> | M30 (0,865)                       | M4"67                     | M30                       | M30                  |
| <b>HG03660</b> | M30 (0,896)                       | M4"67                     | M30                       | M30                  |
| <b>HG03894</b> | M30 (0,899)                       | M4"67                     | M30                       | M30                  |
| <b>HG03693</b> | M30 (0,899)                       | M4"67                     | M30                       | M30                  |
| <b>HG03914</b> | M30 (0,902)                       | M4"67                     | M30                       | M30                  |
| <b>HG03782</b> | M30 (0,913)                       | M4"67                     | M30                       | M30                  |

|                |                     |                             |         |                    |
|----------------|---------------------|-----------------------------|---------|--------------------|
| <b>NA21100</b> | M30 (0,915)         | M4"67                       | M30     | M30                |
| <b>HG03716</b> | M30 (0,943)         | M4"67                       | M4"67   | M30                |
| <b>HG04090</b> | M4"67 (0,865)       | M4"67                       | M30     | M30                |
| <b>HG02780</b> | M4"67 (0,865)       | M4"67                       | M30     | M30                |
| <b>HG04176</b> | M65a+@16311 (0,877) | M65a+@16311,<br>M65a        | M65a1   | M65a+@16311, M65a1 |
| <b>HG04229</b> | M65a+@16311 (0,881) | M65a+@16311,<br>M65a        | M65a1   | M65a+@16311, M65a1 |
| <b>HG03808</b> | M65a+@16311 (0,886) | M65a+@16311,<br>M65a        | M65a1   | M65a+@16311, M65a1 |
| <b>HG03986</b> | M6b (0,856)         | M6b                         | M6b     | M6                 |
| <b>NA19011</b> | M7a+16324 (0,895)   | M7a+16324                   | M7a1    | M7a1               |
| <b>HG01840</b> | M7b1a1f (0,938)     | M7b1a1f                     | M7b1a1f | M7b1a1a            |
| <b>HG02079</b> | M7b1a1f (0,941)     | M7b1a1f                     | M7b1a1f | M7b1a1a            |
| <b>HG02355</b> | M7b1a1f (0,948)     | M7b1a1f                     | M7b1a1f | M7b1a1a            |
| <b>HG02031</b> | M7b1a1f (0,953)     | M7b1a1f                     | M7b1a1f | M7b1a1a            |
| <b>HG00406</b> | N9a10b (0,911)      | N9a10+16311                 | N9a10b  | N9a10b             |
| <b>HG00556</b> | N9a2'4'5 (0,807)    | N9a2'4'5                    | N9a2    | N9a2'4'5, N9a2     |
| <b>HG03851</b> | R (0,706)           | R                           | R7a'b   | R                  |
| <b>HG02774</b> | R (0,718)           | R                           | R31a    | R                  |
| <b>HG02184</b> | R0+16189 (0,657)    | B4                          | B4      | R0+16189           |
| <b>HG03706</b> | R31a (0,746)        | R                           | R31a    | R                  |
| <b>HG02790</b> | R31a (0,761)        | R                           | R31a    | R                  |
| <b>HG03770</b> | R5a2b (0,871)       | R5a2                        | R5a2b   | R5a2b              |
| <b>NA20821</b> | T2f (0,927)         | T2f                         | T2f     | T2+16189           |
| <b>NA12287</b> | U2e1b (0,934)       | U2e1b                       | U2e1b   | U2e1b2             |
| <b>HG01610</b> | U5a1+@16192 (0,879) | U5a1+@16192,<br>U5a1, U5a1e | U5a1e   | U5a1+@16192        |
| <b>HG01530</b> | U5a2 (0,923)        | U5a2                        | U5a2    | U5a2a              |
| <b>HG00260</b> | U5b2a2c (0,957)     | U5b2a2c                     | U5b2a2c | U5b2a2             |
| <b>HG01746</b> | U5b3a2 (0,889)      | U5b                         | U5b3a2  | U5b                |
| <b>HG01620</b> | V+@16298 (0,847)    | V2b                         | V2b     | V+@16298           |
| <b>HG00113</b> | X2b8 (0,916)        | X2b                         | X2b     | X2b8, X2b          |
| <b>HG00100</b> | X2b8 (0,916)        | X2b                         | X2b     | X2b8, X2b          |

## References

- Li, S., Besenbacher, S., Li, Y., Kristiansen, K., Grarup, N., Albrechtsen, A., Sparsø, T., Korneliussen, T., Hansen, T., Wang, J., *et al.* (2014) Variation and association to diabetes in 2000 full mtDNA sequences mined from an exome study in a Danish population. *Eur. J. Hum. Genet.*, **22**, 1040–1045.
- Abecasis, G.R., Auton, A., Brooks, L.D., DePristo, M. a, Durbin, R.M., Handsaker, R.E., Kang, H.M., Marth, G.T. and McVean, G. a (2012) An integrated map of genetic variation from 1,092 human genomes. *Nature*, **491**, 56–65.
- Auton, A., Abecasis, G.R., Altshuler, D.M., Durbin, R.M., Abecasis, G.R., Bentley, D.R., Chakravarti, A., Clark, A.G., Donnelly, P., Eichler, E.E., *et al.* (2015) A global reference for human genetic variation. *Nature*, **526**, 68–74.
